# Supplementary material for: Assessment of health-related quality of life and psychological well-being of children and adolescents with obesity enrolled in a New Zealand community-based intervention programme: an observational study
Source: PubMed Central journal article supplement — BMJ Open. 2017 Aug 9;7(8):e015776. doi: 10.1136/bmjopen-2016-015776 (PMC5629647; doi:10.1136/bmjopen-2016-015776), 2017-08-09
Supplement: bmjopen-2016-015776.draft_revisions.pdf [file bmjopen-2016-015776.draft_revisions.pdf]

# BMJ Open

## Health-related quality of life and psychological well-being in obese New Zealand children and adolescents at enrolment in an obesity intervention programme

|                                 |                                                                                                                                                                                                                                                                                                                                                                                                                                                                                                                                                                                                                                                                                                                                                                                                                                                        |
|---------------------------------|--------------------------------------------------------------------------------------------------------------------------------------------------------------------------------------------------------------------------------------------------------------------------------------------------------------------------------------------------------------------------------------------------------------------------------------------------------------------------------------------------------------------------------------------------------------------------------------------------------------------------------------------------------------------------------------------------------------------------------------------------------------------------------------------------------------------------------------------------------|
| Journal:                        | <i>BMJ Open</i>                                                                                                                                                                                                                                                                                                                                                                                                                                                                                                                                                                                                                                                                                                                                                                                                                                        |
| Manuscript ID                   | bmjopen-2016-015776                                                                                                                                                                                                                                                                                                                                                                                                                                                                                                                                                                                                                                                                                                                                                                                                                                    |
| Article Type:                   | Research                                                                                                                                                                                                                                                                                                                                                                                                                                                                                                                                                                                                                                                                                                                                                                                                                                               |
| Date Submitted by the Author:   | 04-Jan-2017                                                                                                                                                                                                                                                                                                                                                                                                                                                                                                                                                                                                                                                                                                                                                                                                                                            |
| Complete List of Authors:       | Anderson, Yvonne; Taranaki District Health Board, Paediatrics; University of Auckland, Liggins Institute<br>Wynter, Lisa; Taranaki District Health Board, Paediatrics<br>Treves, Katharine; Taranaki District Health Board, Paediatrics<br>Grant, Cameron; University of Auckland, Paediatrics; Starship Children's Hospital, Auckland District Health Board<br>Stewart, Joanna; University of Auckland, Biostatistics<br>Cave, Tami; University of Auckland, Liggins Institute<br>Wouldes, Trecia; University of Auckland Faculty of Medical and Health Sciences, Psychological Medicine<br>Derraik, José; University of Auckland, Liggins Institute<br>Cutfield, Wayne; University of Auckland, Liggins Institute and NRCGD<br>Hofman, Paul; University of Auckland, Liggins Institute; Starship Children's Hospital, Auckland District Health Board |
| <b>Primary Subject Heading</b>: | Paediatrics                                                                                                                                                                                                                                                                                                                                                                                                                                                                                                                                                                                                                                                                                                                                                                                                                                            |
| Secondary Subject Heading:      | Nutrition and metabolism, Mental health                                                                                                                                                                                                                                                                                                                                                                                                                                                                                                                                                                                                                                                                                                                                                                                                                |
| Keywords:                       | PAEDIATRICS, obesity, adolescent, quality of life, lifestyle intervention, Whānau Pakari                                                                                                                                                                                                                                                                                                                                                                                                                                                                                                                                                                                                                                                                                                                                                               |
|                                 |                                                                                                                                                                                                                                                                                                                                                                                                                                                                                                                                                                                                                                                                                                                                                                                                                                                        |

SCHOLARONE™  
Manuscripts

1  
2  
3 1 **Health-related quality of life and psychological well-being in obese New Zealand children**  
4  
5 2 **and adolescents at enrolment in an obesity intervention programme**  
6  
7  
8 3

9  
10 4 Yvonne C Anderson,<sup>1,2</sup> Lisa E Wynter,<sup>1</sup> Katharine F Treves,<sup>1</sup> Cameron C Grant,<sup>3,4,5</sup> Joanna M  
11  
12 5 Stewart,<sup>6</sup> Tami L Cave,<sup>2</sup> Trecia A Wouldes,<sup>7</sup> José G B Derraik,<sup>2</sup> Wayne S Cutfield,<sup>2,4</sup> Paul L  
13  
14 6 Hofman.<sup>2,4</sup>  
15  
16  
17  
18 7

19  
20 8 **Author Institutions/affiliations**

21  
22 9 <sup>1</sup> Department of Paediatrics, Taranaki District Health Board, New Plymouth, New Zealand.

23  
24 10 <sup>2</sup> Liggins Institute, University of Auckland, Auckland, New Zealand.

25  
26 11 <sup>3</sup> Department of Paediatrics, Child and Youth Health, University of Auckland, Auckland, New Zealand.

27  
28 12 <sup>4</sup> Starship Children's Hospital, Auckland District Health Board, Auckland, New Zealand.

29  
30 13 <sup>5</sup> Centre for Longitudinal Research - He Ara ki Mua, University of Auckland, Auckland, New Zealand.

31  
32 14 <sup>6</sup> Department of Epidemiology and Biostatistics, University of Auckland, Auckland, New Zealand.

33  
34 15 <sup>7</sup> Faculty of Medical and Health Sciences, University of Auckland, Auckland, New Zealand.  
35  
36  
37 16

38  
39 17 **Correspondence**

40  
41 18 Yvonne Anderson,

42  
43 19 Department of Paediatrics,

44  
45 20 Taranaki Base Hospital,

46  
47 21 David Street,

48  
49 22 New Plymouth 4310

50  
51 23 [yvonne.anderson@tdhb.org.nz](mailto:yvonne.anderson@tdhb.org.nz), +6468536139  
52  
53

54  
55 24 **Keywords:** Paediatric, obesity, adolescent, quality of life, lifestyle intervention, Whānau Pakari  
56  
57  
58  
59  
60

1  
2  
3 25  
4  
5  
6 26**ABSTRACT**

7  
8 27 **Objective:** To describe health-related quality of life (HRQOL) and psychological characteristics  
9  
10 28 of obese children/adolescents at enrolment in an obesity programme in Taranaki, New Zealand,  
11  
12 29 and whether these are related to ethnicity.

13  
14  
15 30 **Methods:** Participants had a body mass index (BMI)  $\geq 98^{\text{th}}$  percentile or  $> 91^{\text{st}}$  centile with  
16  
17 31 weight-related comorbidities. HRQOL and psychological characteristics were assessed using the  
18  
19 32 PedsQL 4.0<sup>TM</sup> (parent and child reports), and the Achenbach's Child Behaviour Checklist  
20  
21 33 (CBCL).

22  
23  
24 34 **Results:** Assessments were undertaken for 239 participants (45% Māori, 45% New Zealand  
25  
26 35 European, 10% other), aged 4.8-16.8 years. The mean BMI standard deviation score (SDS) was  
27  
28 36 3.09 (range 1.52-5.34). Total PedsQL generic scaled score on parent report was lower  
29  
30 37 (mean=65.4, SD=16.2) than a group of non-obese Australian children from the Health of Young  
31  
32 38 Victorians study (mean=83.1, SD=12.5). Behavioural difficulties (CBCL total score) were  
33  
34 39 reported in forty four percent of participants, with emotional/behavioural difficulties 6 times  
35  
36 40 higher than reported norms ( $p < 0.0001$ ), irrespective of ethnicity.

37  
38 41 **Conclusions:** Obese children and adolescents in this cohort had a low HRQOL, and a  
39  
40 42 concerning level of psychological difficulties.

**Strengths:**

- 43  
44  
45 44  
46  
47 45  
48  
49 46  
50  
51 47  
52  
53 48  
54  
55 49  
56  
57 50  
58  
59 51  
60
- This study is the first to report HRQOL in obese children and adolescents in New Zealand.
  - To our knowledge, there is very limited data regarding ethnicity and HRQOL. Due to the high participation rate from Māori, we were able to evaluate the impact of ethnicity on HRQOL.

48

**49 Limitations:**

- 50 • Due to the lack of NZ HRQOL data, comparisons have been made with population groups of  
51 varying age ranges, which may have affected results.
- 52 • The study participants were a referred cohort, which means our findings are not  
53 representative of the general population. The data from the Victorian cohort were collected in  
54 2000, and the differences noted may have been impacted by the difference in dates of data  
55 collection.
- 56 • Mean BMI SDS for the Victorian cohort identified as obese was not available, which would  
57 be important if it was considerably lower than the Whānau Pakari participants.

**59 INTRODUCTION**

60 Obesity in childhood and adolescence is well known to be associated with many weight-related  
61 comorbidities.<sup>1</sup> Indigenous populations often have higher rates of obesity compared with non-  
62 indigenous counterparts where this information has been collated.<sup>2,3</sup> In New Zealand,  
63 approximately 11% of New Zealand children aged two to fourteen years are obese, with Māori  
64 (New Zealand's indigenous population) being 1.6 times more likely to be obese compared with  
65 non-Māori counterparts.<sup>3</sup> In addition, children living in households in the most  
66 socioeconomically deprived quintile for New Zealand are five times more likely to be obese than  
67 children living in the least deprived areas.<sup>3</sup> In the United States, whilst rates of childhood obesity  
68 are not readily available for American Indian populations, rates of Type 2 Diabetes Mellitus (a  
69 known weight-related comorbidity) are higher.<sup>2</sup> Globally, indigenous populations have  
70 experienced historical trauma secondary to colonisation, are over-represented in socioeconomic

1  
2  
3 71 household deprivation, and both experience the resultant health disparities.<sup>2</sup> The social  
4  
5 72 determinants of health, such as poverty, limited educational attainment, and critically the loss of  
6  
7  
8 73 a traditional diet all contribute to the impact on these population groups in terms of health and  
9  
10 74 well being.<sup>2</sup> Overweight and obesity in adolescence have been shown to be strongly associated  
11  
12 75 with medical complications, including an increase in cardiovascular mortality in adulthood.<sup>4</sup>  
13  
14  
15 76 Emerging evidence suggests that obesity also affects the emotional health and wellbeing of  
16  
17 77 children and adolescents, commonly referred to as health-related quality of life (HRQOL).<sup>5</sup>  
18  
19 78 However, little is known about the HRQOL of indigenous children and adolescents.  
20  
21  
22 79  
23  
24 80 Quality of life is a broad construct that encompasses various aspects pertaining to health and  
25  
26 81 well-being.<sup>6</sup> The assessment of HRQOL is increasingly recognised as a necessary component of  
27  
28 82 health and wellbeing evaluation, assessing physical, emotional, and social health dimensions.<sup>7, 8</sup>  
29  
30 83 Measurement of HRQOL has been shown to have utility in paediatric healthcare settings  
31  
32 84 encompassing numerous chronic health conditions<sup>9-11</sup> and in the assessment of health in young  
33  
34 85 adults.<sup>6</sup>  
35  
36  
37  
38 86  
39  
40  
41 87 Obesity during childhood is associated with impaired HRQOL. In one United States (US) study,  
42  
43 88 106 severely obese children and adolescents attending an obesity clinic reported significantly  
44  
45 89 lower HRQOL than 401 healthy weight comparison children recruited through private practice  
46  
47 90 paediatrician offices and health clinics, and similar HRQOL to 106 children and adolescents  
48  
49 91 undergoing chemotherapy for cancer.<sup>12</sup> The HRQOL of 9 to 12-year-old children enrolled in an  
50  
51 92 Australian community-based longitudinal study was significantly lower among those with  
52  
53 93 obesity versus those without obesity, with the differences not as marked as in the US study, but  
54  
55  
56  
57  
58  
59  
60

1  
2  
3 94 more likely to represent those of obese children not being seen in a specialised clinic setting.<sup>13</sup>  
4  
5 95 Pooled results from 22 cross-sectional and population-based studies report that children and  
6  
7  
8 96 adolescents with obesity have reduced overall HRQOL compared with normal weight  
9  
10 97 counterparts, with 12 of these studies demonstrating an inverse relationship between overall  
11  
12 98 HRQOL and weight status.<sup>5</sup> Potential factors contributing to HRQOL in obese child and  
13  
14 99 adolescent populations include treatment seeking versus community counterparts, gender, age,  
15  
16 100 and weight-related comorbidities.<sup>5</sup>  
17  
18  
19  
20 101  
21  
22 102 Alongside, and likely to be contributing to lower HRQOL, children and adolescents with obesity  
23  
24 103 are at increased risk of behavioural and emotional difficulties. In addition to differences in  
25  
26 104 HRQOL, studies have found concerning levels of internalising (anxiety/depression, social  
27  
28 105 withdrawal, and somatic complaints) and externalising behaviours (delinquency and rule-  
29  
30 106 breaking behaviours) in obese children and adolescents.<sup>14, 15</sup> Others have identified higher rates  
31  
32 107 of depression, behavioural problems, and low self-esteem in obese adolescents attending obesity  
33  
34 108 clinics compared to obese counterparts in the community.<sup>16</sup> Children who are overweight and  
35  
36 109 obese have also been shown to be at risk for psychosocial difficulties such as body image  
37  
38 110 concerns, and emotional, social, and school difficulties.<sup>17</sup>  
39  
40  
41  
42  
43 111  
44  
45 112 Currently there are no published data on the HRQOL of obese children and adolescents in New  
46  
47 113 Zealand. To our knowledge, there has only been quality of life data published on oral quality of  
48  
49 114 life as it relates to dental caries,<sup>18</sup> and Type 1 Diabetes in New Zealand.<sup>11</sup> In addition, there is an  
50  
51 115 absence of cross-cultural evaluation of obesity and HRQOL. In this study, we aimed to describe  
52  
53 116 the HRQOL (parent and child reports) and behavioural and emotional problems of obese  
54  
55  
56  
57  
58  
59  
60

1  
2  
3 117 children and adolescents at enrolment in a multi-disciplinary obesity intervention programme. In  
4  
5 118 addition, we compared this cohort to other populations or to normative data, and also examined  
6  
7  
8 119 potential ethnic differences between indigenous and non-indigenous children and adolescents.  
9

10 120

## 11 121 **METHODS**

12  
13  
14  
15 122 Children and adolescents were recruited into “Whānau Pakari”, a community-based, unblinded  
16  
17 123 randomised controlled trial of a multi-disciplinary obesity intervention programme,<sup>19</sup> based in  
18  
19 124 Taranaki (New Zealand). This region has a population of 23,139 children aged 0-15 years, of  
20  
21 125 whom 81% identify as New Zealand European, 28% as Māori, and 1% as other ethnicity.<sup>20</sup>

22  
23  
24 126 Eligibility was defined by residence in Taranaki, being aged 4.8 to 16.8 years, and being either  
25  
26  
27 127 obese [body mass index (BMI)  $\geq 98^{\text{th}}$  centile], or overweight (BMI  $> 91^{\text{st}}$  centile) with weight-  
28  
29 128 related comorbidities.<sup>21</sup> Referrals were received from a wide range of health professionals  
30  
31 129 (including paediatricians, primary care providers, and public health nurses), Māori health  
32  
33 130 workers, school counsellors and self-referrals.  
34  
35

36 131

37  
38  
39 132 Ethics approval for the programme was granted by the New Zealand Health and Disability Ethics  
40  
41 133 Committee (CEN/11/09/054). Written and verbal informed consents were obtained from all  
42  
43 134 participants or their guardians. The trial was registered with the Australian New Zealand Clinical  
44  
45 135 Trials Registry (ANZCTR: 12611000862943).  
46  
47

48 136

## 49 137 **Assessments**

50  
51  
52 138 Participants underwent a baseline assessment at home, which included taking anthropometric  
53  
54 139 measurements, a medical history and weight-related physical examination, dietary history,  
55  
56 140 physical activity questionnaire, and completion of psychometric questionnaires. Randomisation  
57  
58  
59  
60

1  
2  
3 141 into 6 monthly assessments and advice or the intervention arm occurred if the participants  
4  
5 142 indicated willingness to make healthy lifestyle change.<sup>19</sup> The intervention consisted of weekly  
6  
7 143 sessions delivered by a multi-disciplinary team for 12 months including physical activity, dietary  
8  
9 144 advice, and psychology sessions (for example, the language of obesity, self-esteem, how to  
10  
11 145 persist with healthy lifestyle change).  
12  
13  
14

15 146

### 17 147 **Measures**

18  
19  
20 148 BMI percentile and standard deviation score (SDS) were calculated using UK Cole normative  
21  
22 149 data<sup>22</sup> with the KIGS auxology software (Pfizer Endocrine Care TM). Socioeconomic  
23  
24 150 deprivation was measured at the household level using the New Zealand Deprivation Index  
25  
26 151 2006.<sup>23</sup> This area level deprivation index is a well-validated measure of socioeconomic  
27  
28 152 deprivation in New Zealand, which is derived from national census data on nine socioeconomic  
29  
30 153 characteristics.  
31  
32  
33

34 154

35  
36 155 Quality of life was measured using the Pediatric Quality of Life Inventory (PedsQL)<sup>TM</sup>, which  
37  
38 156 has been specifically designed to evaluate HRQOL in children and adolescents. The PedsQL  
39  
40 157 questionnaire has both parent-proxy and child self-report versions, which take approximately 5  
41  
42 158 minutes to administer. It consists of a 23-item Generic Core Scale questionnaire that assesses  
43  
44 159 problems over the preceding month related to Physical, Emotional, Social and School  
45  
46 160 functioning.<sup>8, 10</sup> The reliability and content validity of this instrument has been demonstrated (in  
47  
48 161 ages 2-16 years).<sup>7, 24</sup> A meaningful cut-off to identify those at risk of impaired HRQOL has been  
49  
50 162 proposed as one SD below the population mean.<sup>24</sup> Individual questions for each area are reverse  
51  
52  
53 163 scored and linearly transformed into a 0-100 scale, where higher scores indicate better HRQOL.  
54  
55  
56  
57  
58  
59  
60



1  
2  
3 164  
4  
5  
6 165 The existence of behavioural difficulties was assessed using the Achenbach Child Behaviour  
7  
8 166 Checklist (CBCL).<sup>25</sup> The CBCL generates ratings of behavioural, emotional, and social  
9  
10 167 problems with these measured on Likert scales. The CBCL, which requires 15 to 20 minutes to  
11  
12 168 complete, can be completed by parents, caregivers, and others who see children in family  
13  
14 169 contexts, or by the young person themselves in the case of the youth self-report (YSR), designed  
15  
16 170 for those aged 11 to 18 years. Similar questions are grouped into a number of subscales, for  
17  
18 171 example, aggressive behaviour, and scores for these questions are added to produce an overall  
19  
20 172 score for that subscale. Subscales are further added to obtain scores for *internalising* and  
21  
22 173 *externalising* problem scales and a total score (T-score) is also derived. Scores are determined to  
23  
24 174 represent *normal*, *borderline*, or *clinical* behaviour, based on quartiles from a normative  
25  
26 175 sample.<sup>25</sup> The normative data for the CBCL has been derived from the 1999 National Survey of  
27  
28 176 Children, Youth and Adults, a US population survey of 2,029 children and adolescents of four  
29  
30 177 ethnic groups (60% Latino white, 20% African American, 12% Mixed other, and 9% Latino), of  
31  
32 178 mixed socioeconomic status (33% “upper”, 16% “lower”), equal gender split, and ranging in age  
33  
34 179 from 6-18 years.<sup>26</sup>

40  
41 180

#### 42 43 181 **Data analyses**

44  
45 182 PedsQL scores from the children and adolescents enrolled in this study were compared to three  
46  
47 183 populations using 2-sample t-tests. These comparison populations were:

48  
49 184 1) A predominantly non-obese cohort of children from the Taranaki region (n=42) with a long-  
50  
51 185 term chronic condition (type 1 diabetes), with a mean age of 11.5 years (range 2-17 years), who  
52  
53 186 were predominantly of New Zealand European [71%] or Māori [19%] ethnicity, and with  
54  
55  
56  
57  
58  
59  
60

1  
2  
3 187 representation from all levels of household deprivation.<sup>11</sup> This cohort were utilised as they are  
4  
5 188 resident in the same region as Whānau Pakari participants, and the only group of New Zealand  
6  
7  
8 189 children for which published HRQOL data using PedsQL exists.

9  
10 190 2) A cohort of Australian children (n=63) from the Health of Young Victorians Study, who were  
11  
12 191 identified as obese.<sup>13</sup> We utilised Australian data due to the lack of New Zealand data available.

13  
14 192 3) A cohort of Australian children from the above study, identified as having normal weight  
15  
16  
17 193 (n=1099). The children in the entire Health of Young Victorians cohort were aged 10.4 years  
18  
19 194 (range 9-12 years), with representation from all quintiles of socioeconomic disadvantage, but  
20  
21 195 ethnicity of participants was not reported.<sup>13</sup> Given that developmental stage may be a  
22  
23 196 contributing factor to HRQOL scores,<sup>5,27</sup> the Whānau Pakari cohort comparison was limited to  
24  
25 197 9-12 years.  
26  
27  
28

29 198  
30  
31 199 Exploratory analyses of the PedsQL data examined potential associations between a number of  
32  
33 200 sociodemographic and clinical parameters with parental and child's generic scaled scores, using  
34  
35 201 simple linear regressions and one-way ANOVA. Multivariable models were used to examine  
36  
37 202 possible associations between the generic scaled scores and important confounding factors,  
38  
39 203 namely age, sex, ethnicity, and socioeconomic deprivation. The above analyses were also run to  
40  
41 204 examine associations with CBCL total scores. One-tailed one-sample proportion tests were used  
42  
43 205 to compare the rates of participants classified as borderline clinical or clinical in each CBCL  
44  
45 206 subscale to the normative data (i.e. expected to be  $\leq 7\%$  of the population). Data were analysed in  
46  
47 207 Minitab v.16 (Pennsylvania State University, State College, PA, USA) and SAS v.9.4 (SAS  
48  
49 208 Institute, Cary, NC, USA). All statistical tests (except one-sample proportion tests) were two-  
50  
51 209 tailed, and significance level was maintained at  $p < 0.05$ .  
52  
53  
54  
55  
56  
57  
58  
59  
60

210

211 **Results**

212 Enrolled participants (n=239) had a mean age of 10.7 years (range 4.8-16.8 years), 52% were  
 213 females, and the sample were predominantly either of Māori (45%) or New Zealand European  
 214 (45%) ethnicity. Nearly a third (29%) resided in households among the most deprived quintile  
 215 (compared with 15% amongst the population of Taranaki).<sup>23, 28, 29</sup> Forty-five percent of Māori  
 216 participants were from the most deprived quintile of household deprivation, compared with 19%  
 217 of New Zealand European participants (p<0.001). BMI SDS at enrolment was 3.09 (SD=0.60,  
 218 range 1.52-5.34 SDS).

219

220 *Quality of life*

221 The PedsQL scores of the study's participants and the three other comparison populations are  
 222 shown in Table 1. There was a moderately positive correlation between overall quality of life  
 223 scores derived from child compared with parental reports (r=0.55; p<0.0001). However, for all  
 224 three PedsQL measures, parents scored their children's HRQOL as being lower than that reported  
 225 by the participants themselves (Table 1).

226

227 **Table 1.** Unadjusted PedsQL total generic scaled scores, as well as psychosocial and physical  
 228 scaled scores (out of 100) for Whānau Pakari participants compared to other Taranaki children  
 229 with type 1 diabetes (predominantly normal weight).<sup>11</sup> Data are means (SD).

|                  | Whānau Pakari Type 1 diabetes |                       |
|------------------|-------------------------------|-----------------------|
| <b>Location</b>  | Taranaki, New Zealand         | Taranaki, New Zealand |
| <b>Source</b>    | This study                    | Mills et al. 2015     |
| <b>n</b>         | 239                           | 42                    |
| <b>Age range</b> | 4.8-16.8 years                | 2-17 years            |

|               |                            |                 |                 |
|---------------|----------------------------|-----------------|-----------------|
| <b>Child</b>  | Total generic scaled score | 72.4 (16.2)†††† | 74.6 (15.3)     |
|               | Psychosocial scaled score  | 69.6 (18.5)†††† | 71.2 (17.1)     |
|               | Physical scaled score      | 77.1 (16.7)†††† | 80.8 (15.3)     |
| <b>Parent</b> | Total generic scaled score | 65.4 (16.2)     | 75.9 (13.4)**** |
|               | Psychosocial scaled score  | 64.4 (17.4)     | 73.7 (13.1)**** |
|               | Physical scaled score      | 66.6 (20.3)     | 79.9 (17.9)**** |

230 \*\*\*\*p<0.0001 for comparison with Whānau Pakari; ††††p<0.0001 for a difference between child and parental  
231 scores

232

233 The Whānau Pakari participants had similar HRQOL scores to Taranaki youth who were

234 predominantly non-obese but with a chronic condition<sup>11</sup> (Table 1). However, obese youth in

235 Whānau Pakari had consistently lower HRQOL scores than normal-weight Australian children

236 (p<0.0001; Table 2), and an obese community sample.<sup>13</sup> Whānau Pakari parents reported that

237 their children had lower HRQOL than those reported by the parents of all three of the

238 comparison groups (p<0.0001; Tables 1 and 2).

239

240 **Table 2.** Unadjusted PedsQL total generic scaled scores, as well as psychosocial and physical  
241 scaled scores (out of 100) for Whānau Pakari participants aged 9 to 12 years, compared to  
242 children and adolescents of two reference populations with a matching age range.<sup>11, 13</sup> Data are  
243 means (SD).

|                  |                            | Whānau Pakari         | Normal weight        | Obese                |
|------------------|----------------------------|-----------------------|----------------------|----------------------|
| <b>Location</b>  |                            | Taranaki, New Zealand | Victoria, Australia  | Victoria, Australia  |
| <b>Source</b>    |                            | This study            | Williams et al. 2005 | Williams et al. 2005 |
| <b>n</b>         |                            | 94                    | 1099                 | 63                   |
| <b>Age range</b> |                            | 9-12 years            | 9-12 years           | 9-12 years           |
| <b>Child</b>     | Total generic scaled score | 69.1 (15.9)†††        | 80.5 (12.2)****      | 74.0 (14.2)*         |
|                  | Psychosocial scaled score  | 65.9 (18.4)†          | 77.7 (14.1)****      | 72.1 (14.1)*         |
|                  | Physical scaled score      | 75.0 (15.6)††††       | 85.7 (12.4)****      | 77.5 (17.9)          |
| <b>Parent</b>    | Total generic scaled score | 63.8 (14.4)           | 83.1 (12.5)****      | 75.0 (14.5)***       |
|                  | Psychosocial scaled score  | 62.0 (15.5)           | 77.6 (14.5)****      | 73.9 (15.3)***       |
|                  | Physical scaled score      | 67.0 (17.9)           | 87.8 (14.3)****      | 76.3 (17.6)**        |

244 \*p<0.05, \*\*p<0.01, \*\*\*p<0.001, and \*\*\*\*p<0.0001 for comparison with Whānau Pakari; †p<0.05, ††p<0.001, and  
245 †††p<0.0001 for a difference between child and parental scores.

246  
247 Exploratory analyses showed consistent associations between child and parent total generic  
248 scaled scores, and certain sociodemographic and clinical parameters, indicating worse overall  
249 quality of life with participants who had breathing pauses (p=0.026 child and p<0.0001 parent  
250 respectively), reported difficulty getting to sleep (p=0.011 and p=0.0003), history of headaches  
251 (p=0.026 and p=0.023), developmental problems (p=0.0002 and p=0.002), and a father being  
252 identified as the sole/primary caregiver as opposed to children living in two-parent families  
253 (p=0.009 and p=0.032). In addition, based upon parent scores, the greater the participant's BMI  
254 SDS at entry to the programme, the worse the quality of life score (p=0.033). In multivariable  
255 models, no association was evident between either child or parental generic scaled scores and  
256 variables which described child age, sex, ethnicity, or household deprivation.

257

### 258 **Child Behaviour Checklist**

259 The median CBCL total score was 58 (IQR=15.3). The distribution of participants' scores is  
260 shown in Figure 1. Just over half of the participants had CBCL total scores in the normal range  
261 (56.3%), while a total of 43.7% had scores in the borderline clinical (16%) and clinical (27.7%)  
262 ranges (Figure 1). From US normative data previously described, the overall proportion of  
263 population falling into the borderline clinical or clinical range is  $\leq 7\%$ .<sup>26</sup> This means that  
264 children in our study had a prevalence of emotional and behavioural problems that was more  
265 than 6 times higher (p<0.0001) than normative populations.

266

267 The classification of participants according to individual CBCL subscales is shown in Table 3.

268 Based on CBCL findings, children and adolescents in our cohort were significantly more likely

269 to display emotional and behavioural difficulties than those in the general population. Compared  
 270 to normative data, the proportion of participants in borderline clinical or clinical ranges was  
 271 considerably greater for all subscales (Table 3).

272  
 273 **Table 3.** Number of participants with T-scores from Child Behavior Checklist (CBCL)  
 274 falling into normal, borderline clinical, and clinical ranges at baseline (n=209). Data are n (%).

| CBCL subscale          | Normal <sup>a</sup> | Borderline Clinical <sup>b</sup> | Clinical <sup>c</sup> |
|------------------------|---------------------|----------------------------------|-----------------------|
| Anxious                | 203 (85.3%)****     | 20 (8.4%)                        | 15 (6.3%)             |
| Withdrawn              | 176 (74.0%)****     | 42 (17.7%)                       | 20 (8.4%)             |
| Somatic complaints     | 181 (76.1%)****     | 37 (15.6%)                       | 20 (8.4%)             |
| Social difficulties    | 159 (76.1%)****     | 31 (14.8%)                       | 19 (9.1%)             |
| Thought problems       | 178 (85.2%)****     | 15 (7.2%)                        | 16 (7.7%)             |
| Attention difficulties | 197 (82.8%)****     | 24 (10.1%)                       | 17 (7.1%)             |
| Rule breaking          | 167 (80.0%)****     | 32 (15.3%)                       | 10 (4.8%)             |
| Aggressive             | 198 (83.2%)****     | 26 (10.9%)                       | 14 (5.9%)             |
| <i>Internalising</i>   | 134 (56.3%)****     | 37 (15.6%)                       | 67 (28.2%)            |
| <i>Externalising</i>   | 153 (64.3%)****     | 34 (14.3%)                       | 51 (21.4%)            |
| <i>Total</i>           | 134 (56.3%)****     | 38 (16.0%)                       | 66 (27.7%)            |

276 *Note.* <sup>a</sup>< 65 which is below 93<sup>rd</sup> centile

277 <sup>b</sup>65-70 which is 93-98<sup>th</sup> centile (apart from internalising/externalising/total 60-63)

278 <sup>c</sup>>70 which is 98<sup>th</sup> centile (apart from internalising/externalising/total >63)

1  
2  
3 279 \*\*\*\* $p < 0.0001$  for comparison with normative data (i.e. expected  $\leq 7\%$  of participants in borderline clinical or  
4  
5 280 clinical ranges combined)  
6

7 281  
8  
9  
10 282 Exploratory analyses showed a higher probability of behavioural and emotional problems (as per  
11  
12 283 CBCL total scores) in those who experienced breathing pauses ( $p = 0.011$ ) or displayed  
13  
14 284 developmental problems ( $p = 0.0002$ ). Multivariable analyses showed no associations between  
15  
16  
17 285 CBCL total scores and age, sex, ethnicity, or socioeconomic deprivation.  
18

19 286

### 21 287 **Ethnic comparisons**

22  
23  
24 288 There were no differences between obese Māori and New Zealand European participants with  
25  
26 289 respect to the child's reported overall PedsQL scores ( $p = 0.09$ ) or PedsQL psychosocial ( $p = 0.15$ )  
27  
28 290 scores, but Māori children reported higher PedsQL physical scores (80.3 versus 75.0,  
29  
30  
31 291 respectively,  $p = 0.02$ ). With respect to parental report, there were no ethnic differences in total  
32  
33 292 quality of life ( $p = 0.85$ ), psychosocial ( $p = 0.77$ ), or physical ( $p = 0.58$ ) scores. There were no  
34  
35  
36 293 differences between Māori and New Zealand European participants on CBCL total ( $p = 0.41$ ),  
37  
38 294 internalizing ( $p = 0.07$ ), or externalizing ( $p = 0.90$ ) scores.  
39

40 295

### 42 296 **DISCUSSION**

43  
44  
45 297 The main findings of this study were that obese children and adolescents in this region of New  
46  
47 298 Zealand had lower HRQOL on parent report measures when compared with those with a chronic  
48  
49 299 condition (i.e. diabetes that requires daily testing and treatment), and other obese and non-obese  
50  
51 300 samples. In addition, as defined by the CBCL total score, a large proportion (44%) had  
52  
53  
54 301 psychological difficulties, with the majority of these being in the clinical rather than the sub-  
55  
56  
57 302 clinical range. The parent report quality of life scores were not dissimilar to those described in  
58  
59  
60

1  
2  
3 303 children with obesity attending a specialist clinic, and were similar to children and adolescents  
4  
5 304 diagnosed with cancer.<sup>12</sup> The degree to which HRQOL appeared to be affected in our cohort was  
6  
7  
8 305 not surprising, given that treatment-seeking parents of obese children are more likely to perceive  
9  
10 306 their child as having a poorer HRQOL and more psychological difficulties when compared with  
11  
12 307 parents of obese children in the community not seeking treatment.<sup>5,30</sup> Our cohort consisted of  
13  
14 308 participants referred to an obesity-intervention programme, so were not a true community-based  
15  
16 309 sample. Nor were they directly comparable to a hospital outpatient clinic population given that  
17  
18 310 Whānau Pakari was specifically designed to address barriers to access which exist for hospital-  
19  
20 311 based outpatient clinical care, particularly for indigenous children.<sup>19</sup> Even allowing for this not  
21  
22 312 being a complete non-referred sample, the difference in HRQOL scores in our cohort compared  
23  
24 313 with a published large (n=10,241) population study of predominantly normal weight children  
25  
26 314 aged 2-16 years (mean score 65.4 vs. 81.3) is considerable.<sup>31</sup>  
27  
28  
29 315  
30  
31  
32 316 Differences between parent-proxy and child self-report on PedsQL questionnaires have been  
33  
34 317 previously reported. A systematic review of the relationship between parents and children's  
35  
36 318 HRQOL scores found better agreement among parents and chronically sick children than  
37  
38 319 between parents and their healthy children.<sup>32</sup> It was argued that both parent and child reports  
39  
40 320 should be obtained as they provide different perspectives. A further review noted differences in  
41  
42 321 parent-child agreement in HRQOL across four different instruments.<sup>33</sup> The authors suggested  
43  
44 322 that the disagreement was a consequence of varying individual beliefs about the child's health  
45  
46 323 and wellbeing, rather than parent or child reports being wrong or right.<sup>33</sup> A Norwegian study  
47  
48 324 reviewed this in relation to children and adolescents seeking treatment for obesity versus a  
49  
50 325 community sample of children of any BMI.<sup>30</sup> Parents reported the quality of life of the obese  
51  
52  
53  
54  
55  
56  
57  
58  
59  
60



1  
2  
3 326 children seeking treatment as lower than those in the community, which was not seen with the  
4  
5 327 child self-report.<sup>30</sup> Pooled analyses however show that paediatric HRQOL can be accurately  
6  
7  
8 328 predicted from parent proxy reports with moderate to strong linear relationships between the two  
9  
10 329 methods of report.<sup>5</sup>

11  
12  
13 330

14  
15 331 We observed that psychological difficulties were prevalent in our cohort. Our participants  
16  
17 332 reported a mean total CBCL score of 64.3 (SD=8.2), which lies in the clinical range, and it was  
18  
19 333 higher than a small non-clinical group of obese adolescents from Turkey (n=30) with a total  
20  
21 334 problem score of 58.2 (SD=7.7).<sup>16</sup> We have no national data for comparison with CBCL, but  
22  
23 335 there is nothing to suggest that scores in the Taranaki region would be higher than those  
24  
25 336 nationally, and there is no known biological reason for this cohort to have higher rates of mental  
26  
27 337 health problems outside of their obesity. The absence of Paediatric psychology services are a  
28  
29 338 notable issue in the region (child and adolescent mental health services are available), and it is  
30  
31 339 unclear if this may contribute to these findings. The randomised clinical trial we are undertaking  
32  
33 340 will be able to assess if the intervention can address the relationships between these variables  
34  
35 341 over time.

36  
37  
38  
39 342

40  
41 343 Child obesity is a major health concern in New Zealand, with the third highest prevalence of  
42  
43 344 overweight and obesity in the OECD (Organisation for Economic Co-operation and  
44  
45 345 Development).<sup>34</sup> Recent studies in this cohort of obese children and adolescents have found  
46  
47 346 suboptimal eating behaviour,<sup>35</sup> suboptimal physical activity,<sup>36</sup> and a high prevalence of weight-  
48  
49 347 related comorbidities, including hypertension and obstructive sleep apnoea.<sup>37</sup> We were not  
50  
51 348 surprised that breathing pauses were associated with poorer HRQOL and higher total scores on  
52  
53  
54  
55  
56  
57  
58  
59  
60

1  
2  
3 349 the CBCL. Breathing pauses in obese children and adolescents are associated with obstructive  
4  
5 350 sleep apnoea,<sup>38</sup> and obese children and adolescents with this condition have reported lower  
6  
7  
8 351 HRQOL total scores than obese peers without the condition.<sup>12</sup> Moderate to severe obstructive  
9  
10 352 sleep apnoea is associated with increased rates of aggressive behaviour, attention problems, and  
11  
12 353 internalizing problems on the CBCL.<sup>39</sup> These observations are important, given the considerable  
13  
14 354 prevalence of breathing pauses reported in this obese cohort,<sup>37</sup> and the wider impact of  
15  
16 355 obstructive sleep apnoea on a child's health, cognitive and behavioural functioning.<sup>40</sup>  
17  
18  
19 356  
20  
21  
22 357 Strengths of this study are that it is the first to report HRQOL in obese children and adolescents  
23  
24 358 in the New Zealand population. Due to the high participation rate from Māori, we were also able  
25  
26 359 to undertake evaluation of the impact of ethnicity. What was interesting and important about our  
27  
28 360 findings in terms of ethnicity was the lack of disparity in HRQOL scores. This was despite a  
29  
30 361 larger proportion of Māori participants being from the most deprived quintile of households. It  
31  
32 362 therefore appears that obesity itself rather than factors such as deprivation is the main identified  
33  
34 363 factor in our participants contributing to lower HRQOL scores.  
35  
36 364  
37  
38  
39 365 A limitation of this study, as with all HRQOL assessments, is the use of an assessment tool to  
40  
41 366 extrapolate one's psychological health and wellbeing. Comparisons of our study have been made  
42  
43 367 with population groups of varying age ranges, which may have affected results. However, age  
44  
45 368 did not appear to have any influence on HRQOL scores in our cohort. Another limitation of this  
46  
47 369 study is that this was a referred cohort, which means our findings are not necessarily  
48  
49 370 representative of the general population. We compared our data with the Health of Young  
50  
51 371 Victorians cohort from Australia, as this was the most comparable group we had access to.  
52  
53  
54  
55  
56  
57  
58  
59  
60

1  
2  
3 372 However, the data were collected in 2000, and the differences noted may have been impacted by  
4  
5 373 the difference in dates of data collection. Mean BMI SDS for the obese Victorian cohort was not  
6  
7  
8 374 available, which would be important if it was considerably lower than the Whānau Pakari  
9  
10 375 participants.  
11

12  
13 376

14  
15 377 In conclusion, this study highlights a lower HRQOL and a higher prevalence of psychological  
16  
17 378 difficulties for this referred community-based group of obese children and adolescents compared  
18  
19  
20 379 with normative population data. No differences were found between Māori and New Zealand  
21  
22 380 Europeans. This is despite Māori being represented in greater numbers in the more deprived  
23  
24 381 households of the region compared with their non- Māori counterparts, suggesting that obesity  
25  
26 382 itself rather than deprivation is the main contributor to lower HRQOL scores. This study  
27  
28  
29 383 highlights the importance of psychologist involvement and screening in the obese child and  
30  
31 384 adolescent population as part of any multi-disciplinary team. Improvement in HRQOL should be  
32  
33  
34 385 considered a goal of all child and adolescent obesity intervention and management. Further  
35  
36 386 research is required to ascertain how to maximise improvements in what is now recognised as an  
37  
38  
39 387 important health outcome.  
40

41 388

#### 42 43 389 **Acknowledgements**

44  
45  
46 390 The authors would like to acknowledge Dr John Doran (Taranaki District Health Board), Diana  
47  
48 391 O'Neill, and Dr Pat Tuohy (Ministry of Health) for their support of the trial; and the Taranaki  
49  
50 392 District Health Board and Sport Taranaki for funding of the clinical service.  
51

52  
53 393

#### 54 55 394 **Funding statement**

56  
57  
58  
59  
60

1  
2  
3 395 This work has been funded by grants from the Health Research Council of New Zealand, Royal  
4  
5 396 Australasian College of Physicians, the Maurice and Phyllis Paykel Trust, Taranaki Medical  
6  
7  
8 397 Foundation, and Lotteries Health Research.  
9

10 398

11  
12  
13 399 **Competing interests**

14  
15 400 All authors have completed the ICMJE uniform disclosure at [www.icmje.org/coi\\_disclosure.pdf](http://www.icmje.org/coi_disclosure.pdf)  
16  
17 401 and declare: financial support for the submitted work from the Health Research Council of New  
18  
19 402 Zealand, Royal Australasian College of Physicians, the Maurice and Phyllis Paykel Trust,  
20  
21 403 Taranaki Medical Foundation, and Lotteries Health Research; YCA and PLH have been  
22  
23 404 recipients of these grants to undertake clinical research in relation to Whānau Pakari, YCA has  
24  
25 405 been paid in a fellowship capacity from the Health Research Council of New Zealand, TLC has  
26  
27 406 been paid as a research assistant, JGBD has been paid for data analysis.  
28  
29  
30

31 407

32  
33  
34 408 **Contributorship statement**

35  
36 409 YCA designed the study, was involved with data interpretation, and drafted this manuscript.  
37  
38 410 LEW recruited participants, and undertook assessments and data entry. KFT provided  
39  
40 411 psychologist oversight and analysis of patient data. CCG is secondary supervisor for the research  
41  
42 412 team, and assisted with the interpretation of the study. JMS was involved in study design. TLC  
43  
44 413 assisted with data entry and analysis. TAW was involved in interpretation of data. JGBD  
45  
46 414 analysed the data. WSC contributed to study design. PLH contributed to study design and  
47  
48 415 supervises the research team. All authors critically revised the manuscript, gave final approval  
49  
50 416 for the version to be published, and are accountable for all aspects of the work.  
51  
52  
53  
54

55 417  
56  
57  
58  
59  
60

1  
2  
3 418 **Data sharing statement**  
4

5 419 Data cannot be made available in a public repository due to the strict conditions of the ethics  
6  
7 approval of this study. Nonetheless, anonymised and de-identified data will be made available to  
8  
9 other investigators upon request. Interested readers should contact the senior author Prof Paul  
10  
11 Hofman (p.hofman@auckland.ac.nz) to obtain the data.  
12  
13  
14

15 423

16  
17  
18  
19 424 **References**  
20

21  
22 425 1. Lakshman R, Elks CE, Ong KK. Childhood obesity. *Circulation*. 2012 Oct 2;126(14):1770-9.  
23

24  
25 426 2. Smylie J, Adomako P. *Indigenous Children's Health Report: Health Assessment in Action*.  
26

27  
28 427 Toronto: The Centre for Research on Inner City Health; 2009. Available from:  
29

30 428 [http://www.stmichaelshospital.com/crich/wp-content/uploads/ichr\\_report-web.pdf](http://www.stmichaelshospital.com/crich/wp-content/uploads/ichr_report-web.pdf)  
31  
32

33  
34 429 3. Ministry of Health, New Zealand. Annual Update of Key Results 2014/2015: New Zealand  
35

36 430 Health Survey. Wellington, New Zealand: Ministry of Health 2015. Available from:  
37

38  
39 431 <http://www.health.govt.nz/system/files/documents/publications/annual-update-key-results-2014->  
40

41 432 [15-nzhs-dec15-1.pdf](http://www.health.govt.nz/system/files/documents/publications/annual-update-key-results-2014-15-nzhs-dec15-1.pdf)  
42  
43

44 433 4. Twig G, Yaniv G, Levine H, et al. Body-mass index in 2.3 million adolescents and  
45

46 434 cardiovascular death in adulthood. *N Engl J Med*. 2016 Apr 13.  
47  
48

49  
50 435 5. Tsiros MD, Olds T, Buckley JD, et al. Health-related quality of life in obese children and  
51

52 436 adolescents. *Int J Obes (Lond)*. 2009 Apr;33(4):387-400.  
53  
54  
55  
56  
57  
58  
59  
60

- 1  
2  
3 437 6. Varni JW, Limbers CA. The PedsQL™ 4.0 generic core scales young adult version:  
4  
5 438 Feasibility, reliability and validity in a university student population. *Journal of Health*  
6  
7  
8 439 *Psychology*. 2009;14(4):611-22.  
9  
10  
11 440 7. Varni JW, Seid M, Kurtin PS. PedsQL™ 4.0: Reliability and validity of the pediatric quality  
12  
13 441 of life inventory version 4.0 generic core scales in healthy and patient populations. *Med Care*.  
14  
15 442 2001 Aug;39(8):800-12.  
16  
17  
18  
19  
20 443 8. Varni JW, Seid M, Rode CA. The PedsQL™: Measurement model for the pediatric quality of  
21  
22 444 life inventory. *Med Care*. 1999 Feb;37(2):126-39.  
23  
24  
25  
26 445 9. Chan KS, Mangione-Smith R, Burwinkle TM, et al. The PedsQL™: Reliability and validity of  
27  
28 446 the short-form generic core scales and asthma module. *Med Care*. 2005 Mar;43(3):256-65.  
29  
30  
31  
32 447 10. Varni JW, Seid M, Knight TS, et al. The PedsQL™ 4.0 generic core scales: Sensitivity,  
33  
34 448 responsiveness, and impact on clinical decision-making. *J Behav Med*. 2002;25(2):175-93.  
35  
36  
37  
38 449 11. Mills SA, Hofman PL, Jiang Y, et al. Health-related quality of life of Taranaki children with  
39  
40 450 type 1 diabetes. *NZ Med J*. 2015;128(1427):25-32.  
41  
42  
43  
44 451 12. Schwimmer JB, Burwinkle TM, Varni JW. Health-related quality of life of severely obese  
45  
46 452 children and adolescents. *JAMA*. 2003 Apr 9;289(14):1813-9.  
47  
48  
49  
50 453 13. Williams J, Wake M, Hesketh K, et al. Health-related quality of life of overweight and obese  
51  
52 454 children. *JAMA*. 2005 Jan 5;293(1):70-6.  
53  
54  
55  
56  
57  
58  
59  
60

- 1  
2  
3 455 14. Giel KE, Zipfel S, Schweizer R, et al. Eating disorder pathology in adolescents participating  
4  
5 456 in a lifestyle intervention for obesity: Associations with weight change, general psychopathology  
6  
7 457 and health-related quality of life. *Obes Facts*. 2013;6(4):307-16.  
8  
9  
10  
11 458 15. Pervanidou P, Bastaki D, Chouliaras G, et al. Internalizing and externalizing problems in  
12  
13 459 obese children and adolescents: Associations with daily salivary cortisol concentrations.  
14  
15 460 *Hormones*. 2015 Oct;14(4):623-31.  
16  
17  
18  
19 461 16. Erermis S, Cetin N, Tamar M, et al. Is obesity a risk factor for psychopathology among  
20  
21 462 adolescents? *Pediatr Int*. 2004 Jun;46(3):296-301.  
22  
23  
24  
25 463 17. Lim CS, Espil FM, Viana AG, et al. Associations between anxiety symptoms and child and  
26  
27 464 family factors in pediatric obesity. *J Dev Behav Pediatr*. 2015 Nov-Dec;36(9):664-72.  
28  
29  
30  
31 465 18. Foster Page LA, Thomson WM. Caries prevalence, severity, and 3-year increment, and their  
32  
33 466 impact upon New Zealand adolescents' oral-health-related quality of life. *J Public Health Dent*.  
34  
35 467 2012;72(4):287-94.  
36  
37  
38  
39 468 19. Anderson YC, Wynter LE, Moller KR, et al. The effect of a multi-disciplinary obesity  
40  
41 469 intervention compared to usual practice in those ready to make lifestyle changes: Design and  
42  
43 470 rationale of Whanau Pakari. *BMC Obesity*. 2015;2(41). doi: 10.1186/s40608-015-0068-y  
44  
45  
46  
47  
48 471 20. Statistics New Zealand. Census 2013: Ethnic group by age group and sex [Internet].  
49  
50 472 Wellington: Statistics New Zealand [accessed 18 Nov 2014]. Available from:  
51  
52 473 <http://nzdotstat.stats.govt.nz/wbos/Index.aspx?DataSetCode=TABLECODE8021#>.  
53  
54  
55  
56  
57  
58  
59  
60

- 1  
2  
3 474 21. Cole TJ. A chart to link child centiles of body mass index, weight and height. *Eur J Clin*  
4  
5 475 *Nutr.* 2002 Dec;56(12):1194-9.  
6  
7  
8  
9 476 22. Freeman JV, Cole TJ, Chinn S, et al. Cross sectional stature and weight reference curves for  
10  
11 477 the UK, 1990. *Arch Dis Child.* 1995 Jul;73(1):17-24.  
12  
13  
14  
15 478 23. University of Otago - School of Medicine and Health Science, New Zealand. NZ Deprivation  
16  
17 479 Index 2006 [Internet]. 2011 [accessed 03 Nov 2014]. Available from:  
18  
19 480 <https://koordinates.com/layer/1066-nz-deprivation-index-2006/>.  
20  
21  
22  
23 481 24. Varni JW, Burwinkle TM, Seid M, et al. The PedsQL™ 4.0 as a pediatric population health  
24  
25 482 measure: Feasibility, reliability, and validity. *Ambul Pediatr.* 2003 Nov-Dec;3(6):329-41.  
26  
27  
28  
29 483 25. Achenbach TM, Ruffle TM. The child behavior checklist and related forms for assessing  
30  
31 484 behavioral/emotional problems and competencies. *Pediatr Rev.* 2000 Aug;21(8):265-71.  
32  
33  
34  
35 485 26. Achenbach TM, Rescorla LA. Manual for the ASEBA school-aged forms and profiles.  
36  
37 486 Research Centre for Children, Youth & Families. Burlington: University of Vermont; 2001.  
38  
39  
40  
41 487 27. Jansen PW, Mensah FK, Clifford S, et al. Bidirectional associations between overweight and  
42  
43 488 health-related quality of life from 4-11 years: Longitudinal study of Australian children. *Int J*  
44  
45 489 *Obes (Lond).* 2013 Oct;37(10):1307-13.  
46  
47  
48  
49 490 28. Ministry of Health, New Zealand. Population of Taranaki DHB [Internet]. Wellington, New  
50  
51 491 Zealand 2015 [accessed 26 Jan 2015]. Available from: [http://www.health.govt.nz/new-zealand-](http://www.health.govt.nz/new-zealand-health-system/my-dhb/taranaki-dhb/population-taranaki-dhb)  
52  
53 492 [health-system/my-dhb/taranaki-dhb/population-taranaki-dhb](http://www.health.govt.nz/new-zealand-health-system/my-dhb/taranaki-dhb/population-taranaki-dhb).  
54  
55  
56  
57  
58  
59  
60



- 1  
2  
3 493 29. Atkinson J, Salmond C, Crampton C. NZDep2013 Index of Deprivation [Internet].  
4  
5 494 Wellington: University of Otago 2014. [accessed 03 April 2016]. Available from:  
6  
7 495 <http://www.otago.ac.nz/wellington/otago069936.pdf>.  
8  
9  
10  
11 496 30. Steinsbekk S, Jozefiak T, Odegard R, et al. Impaired parent-reported quality of life in  
12  
13 497 treatment-seeking children with obesity is mediated by high levels of psychopathology. *Qual*  
14  
15 498 *Life Res.* 2009 Nov;18(9):1159-67.  
16  
17  
18  
19 499 31. Seid M, Varni JW, Cummings L, et al. The impact of realized access to care on health-related  
20  
21 500 quality of life: A two-year prospective cohort study of children in the California state children's  
22  
23 501 health insurance program. *J Pediatr.* 2006;149(3):354-61.  
24  
25  
26  
27 502 32. Eiser C, Morse R. Can parents rate their child's health-related quality of life? Results of a  
28  
29 503 systematic review. *Qual Life Res.* 2001;10(4):347-57.  
30  
31  
32  
33 504 33. Upton P, Lawford J, Eiser C. Parent-child agreement across child health-related quality of  
34  
35 505 life instruments: A review of the literature. *Qual Life Res.* 2008 Aug;17(6):895-913.  
36  
37  
38  
39 506 34. Organisation for Economic Cooperation and Development (OECD). Obesity Update 2014.  
40  
41 507 France: Secretary-General of the OECD 2014. Available from: [http://www.oecd.org/els/health-](http://www.oecd.org/els/health-systems/Obesity-Update-2014.pdf)  
42  
43 508 [systems/Obesity-Update-2014.pdf](http://www.oecd.org/els/health-systems/Obesity-Update-2014.pdf)  
44  
45  
46  
47 509 35. Anderson YC, Wynter LE, Grant CC, et al. Dietary Intake and Eating Behaviours of Obese  
48  
49 510 New Zealand Children and Adolescents Enrolled in a Community-Based Intervention  
50  
51 511 Programme. *PLoS ONE* 11(11): e0166996. doi:10.1371/journal.pone.0166996  
52  
53  
54  
55  
56  
57  
58  
59  
60

- 1  
2  
3 512 36. Anderson YC, Wynter LE, Butler M, et al. Physical activity is low in obese New Zealand  
4  
5 513 children and adolescents. 2016;In press.  
6  
7  
8  
9 514 37. Anderson YC, Wynter LE, Treves KF, et al. Prevalence of comorbidities in obese New  
10  
11 515 Zealand children and adolescents at enrolment in a community-based obesity programme. *J*  
12  
13 516 *Paediatr Child Health*. 2016;52(12):1099-105. doi:10.1111/jpc.13315  
14  
15  
16  
17 517 38. Section on Pediatric Pulmonology, Subcommittee on Obstructive Sleep Apnea Syndrome.  
18  
19 518 American Academy of Pediatrics. Clinical practice guideline: Diagnosis and management of  
20  
21 519 childhood obstructive sleep apnea syndrome. *Pediatrics*. 2002 Apr;109(4):704-12.  
22  
23  
24  
25  
26 520 39. Bourke RS, Anderson V, Yang JSC, et al. Neurobehavioral function is impaired in children  
27  
28 521 with all severities of sleep disordered breathing. *Sleep Med*. 2011 Mar;12(3):222-9.  
29  
30  
31  
32 522 40. Schechter MS, Section on Pediatric Pulmonology, Subcommittee on Obstructive Sleep  
33  
34 523 Apnea Syndrome. Technical report: Diagnosis and management of childhood obstructive sleep  
35  
36 524 apnea syndrome. *Pediatrics*. 2002 Apr;109(4):e69.

37  
38  
39  
40 525  
41  
42  
43  
44  
45  
46  
47  
48  
49  
50  
51  
52  
53  
54  
55  
56  
57  
58  
59  
60

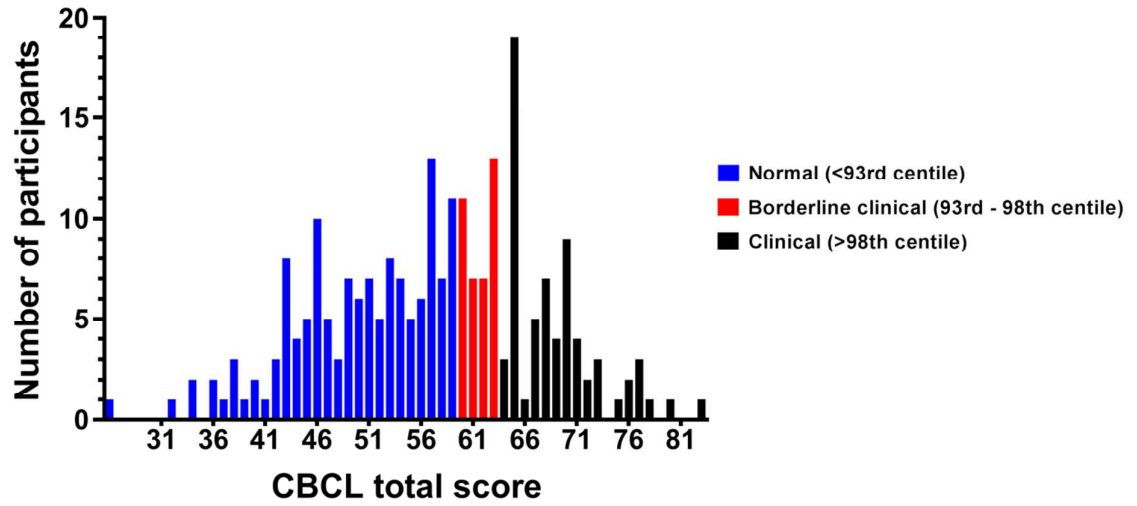

**Figure 1.** The frequency distribution of participants according to the Child Behaviour Checklist (CBCL) total scores.

Peer review only

## STROBE Statement—checklist of items that should be included in reports of observational studies

|                              | Item No | Recommendation                                                                                                                                                                                                                                                                                                                                                                                                                                                         | Complete?                                     |
|------------------------------|---------|------------------------------------------------------------------------------------------------------------------------------------------------------------------------------------------------------------------------------------------------------------------------------------------------------------------------------------------------------------------------------------------------------------------------------------------------------------------------|-----------------------------------------------|
| <b>Title and abstract</b>    | 1       | (a) Indicate the study's design with a commonly used term in the title or the abstract                                                                                                                                                                                                                                                                                                                                                                                 | ✓ 'enrolment' indicates baseline measures     |
|                              |         | (b) Provide in the abstract an informative and balanced summary of what was done and what was found                                                                                                                                                                                                                                                                                                                                                                    | ✓                                             |
| <b>Introduction</b>          |         |                                                                                                                                                                                                                                                                                                                                                                                                                                                                        |                                               |
| Background/rationale         | 2       | Explain the scientific background and rationale for the investigation being reported                                                                                                                                                                                                                                                                                                                                                                                   | ✓                                             |
| Objectives                   | 3       | State specific objectives, including any prespecified hypotheses                                                                                                                                                                                                                                                                                                                                                                                                       | ✓                                             |
| <b>Methods</b>               |         |                                                                                                                                                                                                                                                                                                                                                                                                                                                                        |                                               |
| Study design                 | 4       | Present key elements of study design early in the paper                                                                                                                                                                                                                                                                                                                                                                                                                | ✓                                             |
| Setting                      | 5       | Describe the setting, locations, and relevant dates, including periods of recruitment, exposure, follow-up, and data collection                                                                                                                                                                                                                                                                                                                                        | ✓                                             |
| Participants                 | 6       | (a) <i>Cohort study</i> —Give the eligibility criteria, and the sources and methods of selection of participants. Describe methods of follow-up<br><i>Case-control study</i> —Give the eligibility criteria, and the sources and methods of case ascertainment and control selection. Give the rationale for the choice of cases and controls<br><i>Cross-sectional study</i> —Give the eligibility criteria, and the sources and methods of selection of participants | ✓                                             |
|                              |         | (b) <i>Cohort study</i> —For matched studies, give matching criteria and number of exposed and unexposed<br><i>Case-control study</i> —For matched studies, give matching criteria and the number of controls per case                                                                                                                                                                                                                                                 | ✓                                             |
| Variables                    | 7       | Clearly define all outcomes, exposures, predictors, potential confounders, and effect modifiers. Give diagnostic criteria, if applicable                                                                                                                                                                                                                                                                                                                               | ✓                                             |
| Data sources/<br>measurement | 8*      | For each variable of interest, give sources of data and details of methods of assessment (measurement). Describe comparability of assessment methods if there is more than one group                                                                                                                                                                                                                                                                                   | ✓                                             |
| Bias                         | 9       | Describe any efforts to address potential sources of bias                                                                                                                                                                                                                                                                                                                                                                                                              | ✓ Yes, by adjusting for potential confounders |
| Study size                   | 10      | Explain how the study size was arrived at                                                                                                                                                                                                                                                                                                                                                                                                                              | ✓                                             |
| Quantitative variables       | 11      | Explain how quantitative variables were handled in the analyses. If applicable, describe which groupings were chosen and why                                                                                                                                                                                                                                                                                                                                           | ✓                                             |
| Statistical methods          | 12      | (a) Describe all statistical methods, including those used to control for confounding                                                                                                                                                                                                                                                                                                                                                                                  | ✓                                             |
|                              |         | (b) Describe any methods used to examine subgroups and interactions                                                                                                                                                                                                                                                                                                                                                                                                    | ✓                                             |
|                              |         | (c) Explain how missing data were addressed                                                                                                                                                                                                                                                                                                                                                                                                                            |                                               |
|                              |         | (d) <i>Cohort study</i> —If applicable, explain how loss to follow-up was addressed<br><i>Case-control study</i> —If applicable, explain how matching of cases and controls was addressed<br><i>Cross-sectional study</i> —If applicable, describe analytical methods taking account of sampling strategy                                                                                                                                                              |                                               |
|                              |         | (e) Describe any sensitivity analyses                                                                                                                                                                                                                                                                                                                                                                                                                                  |                                               |

Continued on next page

1  
2  
3  
4  
5  
6  
7  
8  
9  
10  
11  
12  
13  
14  
15  
16  
17  
18  
19  
20  
21  
22  
23  
24  
25  
26  
27  
28  
29  
30  
31  
32  
33  
34  
35  
36  
37  
38  
39  
40  
41  
42  
43  
44  
45  
46  
47  
48  
49  
50  
51  
52  
53  
54  
55  
56  
57  
58  
59  
60

For peer review only

| <b>Results</b>           |     |                                                                                                                                                                                                                                                                                                                                                                                                               |             |
|--------------------------|-----|---------------------------------------------------------------------------------------------------------------------------------------------------------------------------------------------------------------------------------------------------------------------------------------------------------------------------------------------------------------------------------------------------------------|-------------|
| Participants             | 13* | (a) Report numbers of individuals at each stage of study—eg numbers potentially eligible, examined for eligibility, confirmed eligible, included in the study, completing follow-up, and analysed<br>(b) Give reasons for non-participation at each stage<br>(c) Consider use of a flow diagram                                                                                                               | ✓           |
| Descriptive data         | 14* | (a) Give characteristics of study participants (eg demographic, clinical, social) and information on exposures and potential confounders<br>(b) Indicate number of participants with missing data for each variable of interest<br>(c) <i>Cohort study</i> —Summarise follow-up time (eg, average and total amount)                                                                                           | ✓           |
| Outcome data             | 15* | <i>Cohort study</i> —Report numbers of outcome events or summary measures over time<br><i>Case-control study</i> —Report numbers in each exposure category, or summary measures of exposure<br><i>Cross-sectional study</i> —Report numbers of outcome events or summary measures                                                                                                                             | ✓           |
| Main results             | 16  | (a) Give unadjusted estimates and, if applicable, confounder-adjusted estimates and their precision (eg, 95% confidence interval). Make clear which confounders were adjusted for and why they were included<br>(b) Report category boundaries when continuous variables were categorized<br>(c) If relevant, consider translating estimates of relative risk into absolute risk for a meaningful time period | ✓<br>✓<br>✓ |
| Other analyses           | 17  | Report other analyses done—eg analyses of subgroups and interactions, and sensitivity analyses                                                                                                                                                                                                                                                                                                                | ✓           |
| <b>Discussion</b>        |     |                                                                                                                                                                                                                                                                                                                                                                                                               |             |
| Key results              | 18  | Summarise key results with reference to study objectives                                                                                                                                                                                                                                                                                                                                                      | ✓           |
| Limitations              | 19  | Discuss limitations of the study, taking into account sources of potential bias or imprecision. Discuss both direction and magnitude of any potential bias                                                                                                                                                                                                                                                    | ✓           |
| Interpretation           | 20  | Give a cautious overall interpretation of results considering objectives, limitations, multiplicity of analyses, results from similar studies, and other relevant evidence                                                                                                                                                                                                                                    | ✓           |
| Generalisability         | 21  | Discuss the generalisability (external validity) of the study results                                                                                                                                                                                                                                                                                                                                         | ✓           |
| <b>Other information</b> |     |                                                                                                                                                                                                                                                                                                                                                                                                               |             |
| Funding                  | 22  | Give the source of funding and the role of the funders for the present study and, if applicable, for the original study on which the present article is based                                                                                                                                                                                                                                                 | ✓           |

\*Give information separately for cases and controls in case-control studies and, if applicable, for exposed and unexposed groups in cohort and cross-sectional studies.

**Note:** An Explanation and Elaboration article discusses each checklist item and gives methodological background and published examples of transparent reporting. The STROBE checklist is best used in conjunction with this article (freely available on the Web sites of PLoS Medicine at <http://www.plosmedicine.org/>, Annals of Internal Medicine at <http://www.annals.org/>, and Epidemiology at <http://www.epidem.com/>). Information on the STROBE Initiative is available at [www.strobe-statement.org](http://www.strobe-statement.org).

# BMJ Open

## Health-related quality of life and psychological well-being of children and adolescents enrolled in a community-based New Zealand obesity intervention programme

|                                 |                                                                                                                                                                                                                                                                                                                                                                                                                                                                                                                                                                                                                                                                                                                                                                                                                                                        |
|---------------------------------|--------------------------------------------------------------------------------------------------------------------------------------------------------------------------------------------------------------------------------------------------------------------------------------------------------------------------------------------------------------------------------------------------------------------------------------------------------------------------------------------------------------------------------------------------------------------------------------------------------------------------------------------------------------------------------------------------------------------------------------------------------------------------------------------------------------------------------------------------------|
| Journal:                        | <i>BMJ Open</i>                                                                                                                                                                                                                                                                                                                                                                                                                                                                                                                                                                                                                                                                                                                                                                                                                                        |
| Manuscript ID                   | bmjopen-2016-015776.R1                                                                                                                                                                                                                                                                                                                                                                                                                                                                                                                                                                                                                                                                                                                                                                                                                                 |
| Article Type:                   | Research                                                                                                                                                                                                                                                                                                                                                                                                                                                                                                                                                                                                                                                                                                                                                                                                                                               |
| Date Submitted by the Author:   | 31-Mar-2017                                                                                                                                                                                                                                                                                                                                                                                                                                                                                                                                                                                                                                                                                                                                                                                                                                            |
| Complete List of Authors:       | Anderson, Yvonne; Taranaki District Health Board, Paediatrics; University of Auckland, Liggins Institute<br>Wynter, Lisa; Taranaki District Health Board, Paediatrics<br>Treves, Katharine; Taranaki District Health Board, Paediatrics<br>Grant, Cameron; University of Auckland, Paediatrics; Starship Children's Hospital, Auckland District Health Board<br>Stewart, Joanna; University of Auckland, Biostatistics<br>Cave, Tami; University of Auckland, Liggins Institute<br>Wouldes, Trecia; University of Auckland Faculty of Medical and Health Sciences, Psychological Medicine<br>Derraik, José; University of Auckland, Liggins Institute<br>Cutfield, Wayne; University of Auckland, Liggins Institute and NRCGD<br>Hofman, Paul; University of Auckland, Liggins Institute; Starship Children's Hospital, Auckland District Health Board |
| <b>Primary Subject Heading</b>: | Paediatrics                                                                                                                                                                                                                                                                                                                                                                                                                                                                                                                                                                                                                                                                                                                                                                                                                                            |
| Secondary Subject Heading:      | Nutrition and metabolism, Mental health                                                                                                                                                                                                                                                                                                                                                                                                                                                                                                                                                                                                                                                                                                                                                                                                                |
| Keywords:                       | PAEDIATRICS, obesity, adolescent, quality of life, lifestyle intervention, Whānau Pakari                                                                                                                                                                                                                                                                                                                                                                                                                                                                                                                                                                                                                                                                                                                                                               |
|                                 |                                                                                                                                                                                                                                                                                                                                                                                                                                                                                                                                                                                                                                                                                                                                                                                                                                                        |

SCHOLARONE™  
Manuscripts

1  
2  
3 **1 Health-related quality of life and psychological well-being of children and adolescents**  
4  
5 **2 enrolled in a community-based New Zealand obesity intervention programme**  
6  
7  
8  
9

10 4 Yvonne C Anderson,<sup>1,2</sup> Lisa E Wynter,<sup>1</sup> Katharine F Treves,<sup>1</sup> Cameron C Grant,<sup>3,4,5</sup> Joanna M  
11  
12 5 Stewart,<sup>6</sup> Tami L Cave,<sup>2</sup> Trecia A Wouldes,<sup>7</sup> José G B Derraik,<sup>2,8,9</sup> Wayne S Cutfield,<sup>2,4,8</sup> Paul L  
13  
14 6 Hofman.<sup>2,4</sup>  
15  
16  
17  
18  
19

20 **8 Author Institutions/affiliations**

21  
22 9 <sup>1</sup> Department of Paediatrics, Taranaki District Health Board, New Plymouth, New Zealand.

23  
24 10 <sup>2</sup> Liggins Institute, University of Auckland, Auckland, New Zealand.

25  
26 11 <sup>3</sup> Department of Paediatrics, Child and Youth Health, University of Auckland, Auckland, New Zealand.

27  
28 12 <sup>4</sup> Starship Children's Hospital, Auckland District Health Board, Auckland, New Zealand.

29  
30 13 <sup>5</sup> Centre for Longitudinal Research - He Ara ki Mua, University of Auckland, Auckland, New Zealand.

31  
32 14 <sup>6</sup> Department of Epidemiology and Biostatistics, University of Auckland, Auckland, New Zealand.

33  
34 15 <sup>7</sup> Faculty of Medical and Health Sciences, University of Auckland, Auckland, New Zealand.

35  
36 16 <sup>8</sup> A Better Start – National Science Challenge, University of Auckland, Auckland, New Zealand.

37  
38 17 <sup>9</sup> Department of Women's and Children's Health, Uppsala University, Uppsala, Sweden.  
39  
40  
41  
42  
43

44 **19 Correspondence**

45  
46 20 Yvonne Anderson,

47  
48 21 Department of Paediatrics,

49  
50 22 Taranaki Base Hospital,

51  
52 23 David Street,

53  
54 24 New Plymouth 4310  
55  
56  
57  
58  
59  
60



1  
2  
3 25 [yvonne.anderson@tdhb.org.nz](mailto:yvonne.anderson@tdhb.org.nz), +6467536139  
4

5 26 **Keywords:** Paediatric, obesity, adolescent, quality of life, lifestyle intervention, Whānau Pakari  
6

7  
8 27 **Word count:** 4107  
9

10 28

11  
12  
13 29 **ABSTRACT**  
14

15 30 **Objective:** To describe health-related quality of life (HRQOL) and psychological well-being of  
16  
17 31 children and adolescents at enrolment in a multi-disciplinary community-based obesity  
18  
19 32 programme, and to determine association with ethnicity. This programme targeted indigenous  
20  
21 33 people and those from most deprived households. Further, this cohort was compared to other  
22  
23 34 populations/normative data.  
24  
25

26  
27 35 **Methods:** This study examines baseline demographic data of an unblinded randomised  
28  
29 36 controlled clinical trial. Participants (recruited from January 2012-August 2014) resided in  
30  
31 37 Taranaki, New Zealand (NZ), and for this study we only included those with a body mass index  
32  
33 38 (BMI)  $\geq 98^{\text{th}}$  percentile (obese). HRQOL and psychological well-being were assessed using the  
34  
35 39 PedsQL 4.0<sup>TM</sup> (parent and child reports), and the Achenbach's Child Behaviour Checklist  
36  
37 40 (CBCL)/Youth Self Report (YSR). The trial was registered with the Australian NZ Clinical  
38  
39 41 Trials Registry (ANZCTR: 12611000862943).  
40  
41  
42

43 42 **Results:** Assessments were undertaken for 233 participants (45% Māori, 45% NZ European,  
44  
45 43 10% other ethnicities, 52% female, 30% from the most deprived household quintile), mean age  
46  
47 44 10.6 years. The mean BMI standard deviation score (SDS) was 3.12 (range 2.01-5.34). Total  
48  
49 45 PedsQL generic scaled score (parent) was lower (mean=63.4, SD=14.0) than an age-matched  
50  
51 46 group of Australian children without obesity from the Health of Young Victorians study  
52  
53 47 (mean=83.1, SD=12.5). In multivariable models, child and parental generic scaled scores  
54  
55  
56  
57  
58  
59  
60

1  
2  
3 48 decreased in older children ( $\beta=-0.70$  and  $p=0.031$ ,  $\beta=-0.64$  and  $p=0.047$ , respectively).  
4  
5 49 Behavioural difficulties (CBCL/YSR total score) were reported in 43.5% of participants, with the  
6  
7  
8 50 rate of emotional/behavioural difficulties 6 times higher than reported norms ( $p<0.001$ ).  
9

10 51 **Conclusions:** In this cohort, children and adolescents with obesity had a low HRQOL, and a  
11  
12 52 concerning level of psychological difficulties, irrespective of ethnicity. Obesity itself rather than  
13  
14 53 ethnicity or deprivation appeared to contribute to lower HRQOL scores. This study highlights the  
15  
16 54 importance of psychologist involvement in obesity intervention programmes.  
17  
18  
19

20 55

21  
22 56 **Strengths:**

- 23  
24 57 • This study is the first to report HRQOL in children and adolescents with obesity in New  
25  
26 58 Zealand.  
27  
28 59 • To our knowledge, there are very limited data regarding ethnicity and HRQOL. Due to the  
29  
30 60 high participation rate from Māori, we were able to evaluate the impact of ethnicity on HRQOL.  
31  
32  
33

34 61

35  
36 62 **Limitations:**

- 37  
38 63 • Due to the lack of NZ HRQOL data, comparisons have been made with population groups of  
39  
40 64 varying age ranges, which may have affected results.  
41  
42 65 • The study participants were a referred cohort, which means our findings are not  
43  
44 66 representative of the general population. The data from the Victorian cohort were collected in  
45  
46 67 2000, and the differences noted may have been impacted by the difference in dates of data  
47  
48 68 collection.  
49  
50 69 • Mean BMI SDS for the Victorian cohort identified as obese was not available, which would  
51  
52 70 be important if it was considerably lower than the Whānau Pakari participants.  
53  
54  
55  
56  
57  
58  
59  
60

1  
2  
3 71 • There were no adjustments for multiple comparisons in our statistical analyses; due to the  
4  
5 72 inflated likelihood of Type I errors, our findings (particularly from exploratory analyses) need to  
6  
7  
8 73 be interpreted accordingly.  
9

10 74

## 12 75 INTRODUCTION

13 76

14  
15  
16  
17 77 Obesity in childhood and adolescence is known to be associated with weight-related  
18  
19 78 comorbidities.<sup>1</sup> Indigenous populations often have higher rates of obesity compared with non-  
20  
21 79 indigenous counterparts where this information has been collated.<sup>2,3</sup> In New Zealand,  
22  
23 80 approximately 11% of New Zealand children aged two to fourteen years are classed as obese,  
24  
25 81 with Māori (New Zealand's indigenous population) being 1.6 times more likely to be in the  
26  
27 82 obese range compared with non-Māori counterparts.<sup>3</sup> In addition, children living in households  
28  
29 83 in the most socioeconomically deprived quintile for New Zealand are five times more likely to  
30  
31 84 be in the obese range than children living in the least deprived areas.<sup>3</sup> In the United States,  
32  
33 85 whilst rates of children with obesity are not readily available for American Indian populations,  
34  
35 86 rates of Type 2 diabetes mellitus (a known weight-related comorbidity) are higher.<sup>2</sup>  
36  
37  
38  
39  
40  
41  
42

43 87

44 88 Globally, indigenous populations that have experienced historical trauma secondary to  
45  
46 89 colonisation, are over-represented in socioeconomic household deprivation, and both experience  
47  
48 90 the resultant health disparities.<sup>2</sup> The social determinants of health, such as poverty, limited  
49  
50 91 educational attainment, and critically the loss of a traditional diet all contribute to the impact on  
51  
52 92 these population groups in terms of health and well-being.<sup>2</sup> Overweight and obesity in  
53  
54 93 adolescence have been shown to be strongly associated with medical complications, including an  
55  
56  
57  
58  
59  
60

1  
2  
3 94 increase in cardiovascular mortality in adulthood.<sup>4</sup> Emerging evidence suggests that obesity also  
4  
5 95 affects the emotional health and well-being of children and adolescents, commonly referred to as  
6  
7  
8 96 health-related quality of life (HRQOL).<sup>5</sup> However, little is known about the HRQOL of  
9  
10  
11 97 indigenous children and adolescents, especially as it pertains to weight. Previous research has  
12  
13 98 found that Sami (the indigenous people of Sweden) children experience lower HRQOL in some  
14  
15 99 domains compared with Swedish children in general.<sup>6</sup> In relation to HRQOL as it pertains to  
16  
17 100 weight, and the impact of ethnicity, it is acknowledged that information about the relationship  
18  
19  
20 101 between HRQOL and weight may not have transferability from one cultural context to another,  
21  
22 102 given differing perceptions of body image cross-culturally.<sup>7, 8</sup>  
23  
24  
25 103

26  
27 104 Quality of life is a broad construct that encompasses various aspects pertaining to health and  
28  
29 105 well-being.<sup>9</sup> The assessment of HRQOL is increasingly recognised as a necessary component of  
30  
31 106 health and well-being evaluation, assessing physical, emotional, and social health dimensions.<sup>10</sup>  
32  
33  
34 107 <sup>11</sup> Measurement of HRQOL has been shown to have utility in paediatric healthcare settings  
35  
36 108 encompassing numerous chronic health conditions<sup>12-14</sup> and in the assessment of health in young  
37  
38 109 adults.<sup>9</sup>  
39  
40  
41 110

42  
43 111 Obesity during childhood is associated with impaired HRQOL. In one United States (US) study,  
44  
45 112 106 children and adolescents with severe obesity attending an obesity clinic reported  
46  
47  
48 113 significantly lower HRQOL than 401 healthy weight comparison children recruited through  
49  
50 114 private practice paediatrician offices and health clinics, and similar HRQOL to 106 children and  
51  
52 115 adolescents undergoing chemotherapy for cancer.<sup>15</sup> The HRQOL of 9 to 12-year-old children  
53  
54  
55 116 enrolled in an Australian community-based longitudinal study was significantly lower among  
56  
57  
58  
59  
60

1  
2  
3 117 those with obesity versus those without obesity, with the differences not as marked as in the US  
4  
5 118 study, but more likely to represent those of children with obesity not being seen in a specialised  
6  
7 119 clinic setting.<sup>16</sup> Pooled results from 22 cross-sectional and population-based studies report that  
8  
9 120 children and adolescents with obesity have reduced overall HRQOL compared with normal  
10  
11 121 weight counterparts, with 12 of these studies demonstrating an inverse relationship between  
12  
13 122 overall HRQOL and weight status.<sup>5</sup> Potential factors contributing to HRQOL in child and  
14  
15 123 adolescent populations with obesity include treatment seeking versus community counterparts,  
16  
17 124 gender, age, and weight-related comorbidities.<sup>5</sup>  
18  
19  
20  
21  
22  
23

24 126 Alongside, and likely to be contributing to lower HRQOL, children and adolescents with obesity  
25  
26 127 are at increased risk of behavioural and emotional difficulties. In addition to differences in  
27  
28 128 HRQOL, studies have found concerning levels of internalising (anxiety/depression, social  
29  
30 129 withdrawal, and somatic complaints) and externalising behaviours (delinquency and rule-  
31  
32 130 breaking behaviours) in children and adolescents with obesity.<sup>17, 18</sup> Others have identified higher  
33  
34 131 rates of depression, behavioural problems, and low self-esteem in adolescents with obesity  
35  
36 132 attending obesity clinics compared to affected counterparts in the community.<sup>19</sup> Children who  
37  
38 133 are overweight and obese have also been shown to be at risk for psychosocial difficulties such as  
39  
40 134 body image concerns, and emotional, social, and school difficulties.<sup>20</sup>  
41  
42  
43  
44  
45  
46  
47

48 136 Currently there are no published data on the HRQOL of children and adolescents with obesity in  
49  
50 137 New Zealand. To our knowledge, there has only been quality of life data published on oral  
51  
52 138 quality of life as it relates to dental caries,<sup>21</sup> and Type 1 diabetes in New Zealand.<sup>14</sup> In addition,  
53  
54 139 there is an absence of cross-cultural evaluation of obesity and HRQOL. In this study, we aimed  
55  
56  
57  
58  
59  
60

1  
2  
3 140 to describe the HRQOL (parent and child reports) and behavioural and emotional problems of  
4  
5 141 children and adolescents with obesity at enrolment in a multi-disciplinary obesity intervention  
6  
7  
8 142 programme. In addition, we compared this cohort to other populations or to normative data, and  
9  
10 143 also examined potential ethnic differences between indigenous and non-indigenous children and  
11  
12 144 adolescents. It was hypothesised that obesity is associated with lower HRQOL in New Zealand  
13  
14 145 children and adolescents with obesity.  
15  
16  
17  
18 146

## 19 20 147 **METHODS**

21  
22 148  
23  
24 149 Children and adolescents were recruited into “Whānau Pakari”, a community-based, unblinded  
25  
26  
27 150 randomised controlled trial of a multi-disciplinary obesity intervention programme,<sup>22</sup> based in  
28  
29 151 Taranaki (New Zealand). This region has a population of 23,139 children aged 0-15 years, of  
30  
31 152 whom 81% identify as New Zealand European, 28% as Māori, and 1% as other ethnicity.<sup>23</sup>  
32  
33  
34 153 Eligibility was defined by residence in Taranaki, being aged 4.8 to 16.8 years, and either in obese  
35  
36 154 [body mass index (BMI)  $\geq$ 98<sup>th</sup> centile], or overweight (BMI  $>$ 91<sup>st</sup> centile) categories with  
37  
38  
39 155 weight-related comorbidities.<sup>24</sup> However, only obese participants were included in the study  
40  
41 156 reported here. Referrals were received between January 2012 and August 2014 from a wide  
42  
43 157 range of health professionals (including paediatricians, primary care providers, and public health  
44  
45  
46 158 nurses), Māori health workers, school counsellors and self-referrals. This study examines  
47  
48 159 elements of the baseline demographic data.  
49  
50  
51 160

52  
53 161 Ethics approval for the programme was granted by the New Zealand Health and Disability Ethics  
54  
55 162 Committee (CEN/11/09/054). Written and verbal informed consents were obtained from all  
56  
57  
58  
59  
60

1  
2  
3 163 participants or their guardians. The trial was registered with the Australian New Zealand Clinical  
4  
5 164 Trials Registry (ANZCTR: 12611000862943).  
6  
7

8 165  
9 166 **Assessments**

10  
11 167 Participants underwent a baseline assessment at home, which included taking anthropometric  
12  
13 168 measurements, a medical history and weight-related physical examination, dietary history,  
14  
15 169 physical activity questionnaire, and completion of psychometric questionnaires. Questions  
16  
17 170 pertaining to family structure, developmental history, presence/absence of headaches, difficulty  
18  
19 171 getting to sleep, and presence/absence of breathing pauses were all included in the weight-related  
20  
21 172 medical history. Randomisation into 6 monthly assessments and advice or the intervention arm  
22  
23 173 occurred if the participants indicated willingness to make healthy lifestyle change.<sup>22</sup> The  
24  
25 174 intervention consisted of weekly sessions delivered by a multi-disciplinary team for 12 months  
26  
27 175 including physical activity, dietary advice, and psychology sessions (for example, self-esteem,  
28  
29 176 the importance of sleep, how to make and persist with healthy lifestyle change).  
30  
31  
32  
33  
34

35 177  
36  
37 178 **Measures**

38  
39 179 BMI percentile and standard deviation score (SDS) were calculated using UK Cole normative  
40  
41 180 data<sup>25</sup> with the KIGS auxology software (Pfizer Endocrine Care TM). Socioeconomic  
42  
43 181 deprivation was measured at the household level using the New Zealand Deprivation Index 2006.  
44  
45 182 <sup>26</sup> This area level deprivation index is a well-validated measure of socioeconomic deprivation in  
46  
47 183 New Zealand, which is derived from national census data on nine socioeconomic characteristics.  
48  
49  
50 184  
51  
52 185 Quality of life was measured using the Pediatric Quality of Life Inventory (PedsQL)<sup>TM</sup>, which  
53  
54 186 has been specifically designed to evaluate HRQOL in children and adolescents. The PedsQL  
55  
56  
57  
58  
59  
60

1  
2  
3 187 questionnaire has both parent-proxy and child self-report versions, which take approximately 5  
4  
5  
6 188 minutes to administer. It consists of a 23-item Generic Core Scale that assesses problems over  
7  
8 189 the preceding month related to Physical, Emotional, Social and School functioning.<sup>11, 13</sup> The  
9  
10  
11 190 reliability of this instrument has been demonstrated in ages 2-16 years as excellent ( $\alpha = 0.89$   
12  
13 191 child; 0.92 parent report) with acceptable construct validity, in a large population survey in the  
14  
15 192 US (n=10,241), with white, Hispanic/Latino, black/African American, Asian/Pacific Islander,  
16  
17 193 American Indian and Native Alaskan participants.<sup>27</sup> A meaningful cut-off to identify those at  
18  
19 194 risk of impaired HRQOL has been proposed as one SD below the population mean.<sup>27</sup> Individual  
20  
21 195 questions for each area are reverse scored and linearly transformed into a 0-100 scale, where  
22  
23 196 higher scores indicate better HRQOL.  
24  
25  
26

27 197  
28  
29 198 The existence of behavioural difficulties was assessed using the Achenbach Child Behaviour  
30  
31 199 Checklist (CBCL) ages 1.5-5 and ages 6-18 (parent report) and Youth Self Report (YSR) for  
32  
33 200 ages 11-18.<sup>28</sup> The CBCL/YSR generate ratings of behavioural, emotional, and social problems.  
34  
35 201 The CBCL can be completed by parents, caregivers, or others who see children in family  
36  
37 202 contexts, or by the young person themselves in the case of the youth self-report (YSR). When the  
38  
39 203 young person completed the YSR, no parent CBCL report was obtained in order to reduce the  
40  
41 204 burden of assessment on the family. Subscale scores for the YSR and the CBCL are calculated  
42  
43 205 for a number of behavioural and psychological problems such as aggressive behaviour, and  
44  
45 206 somatic complaints. Subscales are then combined to obtain overall *T*-scores for *internalising* and  
46  
47 207 *externalising* problems. Aggregate scores that represent *normal*, *borderline*, or *clinical* behaviour  
48  
49 208 are based on quartiles from a normative sample.<sup>28</sup> The normative data for the CBCL/YSR has  
50  
51 209 been derived from the 1999 National Survey of Children, Youth and Adults, a US population  
52  
53  
54  
55  
56  
57  
58  
59  
60



1  
2  
3 210 survey of 2,029 children and adolescents of four ethnic groups (60% Latino white, 20% African  
4  
5 211 American, 12% Mixed other, and 9% Latino), of mixed socioeconomic status (33% “upper”,  
6  
7  
8 212 16% “lower”), equal gender split, and ranging in age from 6-18 years.<sup>29</sup>  
9  
10

11 213

### 12 13 214 **Data analyses**

14  
15 215 PedsQL scores from the children and adolescents enrolled in this study were compared to three  
16  
17 216 populations using 2-sample t-tests. These comparison populations were:

18  
19  
20 217 1) A predominantly normal weight cohort of children from the Taranaki region (n=42) with a  
21  
22 218 long-term chronic condition (Type 1 diabetes), with a mean age of 11.5 years (range 2-17 years),  
23  
24 219 who were predominantly of New Zealand European [71%] or Māori [19%] ethnicity, and with  
25  
26  
27 220 representation from all levels of household deprivation.<sup>14</sup> This cohort was utilised as they were  
28  
29 221 resident in the same region as Whānau Pakari participants, and the only group of New Zealand  
30  
31 222 children for which published HRQOL data using PedsQL exists. Recruitment period was May-  
32  
33  
34 223 July 2013.

35  
36 224 2) A cohort of Australian children (n=63) from the Health of Young Victorians Study (follow-up  
37  
38 225 data collected in 2000), who were identified as having obesity (from the total cohort of n=1456).  
39  
40 226 <sup>16</sup> We utilised Australian data due to the lack of New Zealand data available.

41  
42  
43 227 3) A cohort of Australian children from the above study (follow-up data collected in 2000),  
44  
45 228 identified as having normal weight (n=1099, from the total cohort of n=1456). The children in  
46  
47 229 the entire Health of Young Victorians cohort were aged 10.4 years (range 9-12 years), with  
48  
49  
50 230 representation from all quintiles of socioeconomic disadvantage, but ethnicity of participants was  
51  
52 231 not reported.<sup>16</sup> Given that developmental stage may be a contributing factor to HRQOL scores,<sup>5,</sup>  
53  
54  
55 232 <sup>30</sup> the Whānau Pakari cohort comparison was limited to 9-12 years (n=91).  
56  
57  
58  
59  
60

1  
2  
3 233  
4  
5  
6 234 Exploratory analyses of the PedsQL data examined potential associations between a number of  
7  
8 235 sociodemographic and clinical parameters with parental and child's generic scaled scores  
9  
10 236 separately, using simple linear regressions and one-way ANOVA. Further, multivariable models  
11  
12 237 were used to examine possible associations between either parental or child's generic scaled  
13  
14 238 score and important confounding factors, namely age, sex, ethnicity, and socioeconomic  
15  
16 239 deprivation.  
17  
18  
19  
20 240  
21  
22 241 CBCL and YSR T-scores were utilised. One-tailed one-sample proportion tests were used to  
23  
24 242 compare the rates of participants classified as borderline clinical or clinical in each CBCL/YSR  
25  
26 243 subscale to the normative data (i.e. expected to be  $\leq 7\%$  of the population). Exploratory analyses  
27  
28 244 using generalized linear regression models also examined the likelihood of displaying  
29  
30 245 behavioural and emotional problems (i.e. having CBCL/YSR scores in the borderline or clinical  
31  
32 246 ranges) in association with certain demographic parameters, adjusting only for source of test  
33  
34 247 scores (i.e. parent or youth). A similarly constructed multivariable model was also run adjusting  
35  
36 248 for age, sex, ethnicity, and socioeconomic deprivation. These results are provided as relative  
37  
38 249 risks (RR) and respective 95% confidence intervals (CI). Data were analysed in Minitab v.16  
39  
40 250 (Pennsylvania State University, State College, PA, USA) and SAS v.9.4 (SAS Institute, Cary,  
41  
42 251 NC, USA). All statistical tests (except one-sample proportion tests) were two-tailed. Significance  
43  
44 252 level was maintained at  $p < 0.05$ , with no adjustments for multiple comparisons.  
45  
46  
47  
48  
49  
50  
51 253

## 52 254 **RESULTS**

53  
54  
55 255  
56  
57  
58  
59  
60

1  
2  
3 256 After exclusion of 6 participants who were in the overweight category, enrolled participants  
4  
5  
6 257 (n=233) had a mean age of 10.6 years (range 4.8-16.8 years), 52% were females, and the sample  
7  
8 258 were predominantly either of Māori (45%) or New Zealand European (45%) ethnicity. Nearly a  
9  
10 259 third (30%) resided in households among the most deprived quintile (compared with 15%  
11  
12 260 amongst the population of Taranaki).<sup>26, 31, 32</sup> Forty-two percent of Māori participants were from  
13  
14 261 the most deprived quintile of household deprivation, compared with 20% of New Zealand  
15  
16 262 European participants (p<0.001). BMI SDS at enrolment was 3.12 (SD=0.57, range 2.01-5.34  
17  
18 263 SDS). Demographics of family and medical history have been previously reported for the total  
19  
20 264 cohort.<sup>33</sup> In brief, among our 233 participants, living arrangements included a two-parent  
21  
22 265 household for half of the participants (n=119, 52%), one-parent household (mother) for 38%  
23  
24 266 (n=87), one-parent household (father) for 4% (n=10), and other arrangement for 6% (n=14).  
25  
26 267 Headaches were prevalent in 32% (n=75), 32% of participants had difficulties getting to sleep  
27  
28 268 (n=75), 20% had breathing pauses (n=47), and 9% had developmental concerns (n=20).  
29  
30  
31  
32  
33

### 34 269

### 35

### 36 270 *Quality of life*

### 37

38 271 The PedsQL scores of our study's participants and those of another study population in Taranaki  
39  
40 272 are shown in Table 1. There was a moderately positive correlation between overall quality of life  
41  
42 273 scores derived from child compared with parental reports (r=0.55; p<0.001). However, for all  
43  
44 274 three PedsQL measures, parents scored their children's HRQOL as being lower than that reported  
45  
46 275 by the participants themselves (Table 1).  
47  
48  
49

50 276

51  
52  
53 277 **Table 1.** Unadjusted PedsQL total generic scaled scores, as well as psychosocial and physical  
54  
55 278 scaled scores (out of 100) for Whānau Pakari participants compared to other Taranaki children  
56  
57  
58  
59  
60

279 with Type 1 diabetes (predominantly normal weight).<sup>14</sup> Whānau Pakari data are mean ± SD  
 280 (95% confidence interval of the mean), while other data are mean ± SD.

|                  |                            | Whānau Pakari               | Type 1 diabetes       |
|------------------|----------------------------|-----------------------------|-----------------------|
| <b>Location</b>  |                            | Taranaki, New Zealand       | Taranaki, New Zealand |
| <b>Source</b>    |                            | This study                  | Mills et al. 2015     |
| <b>n</b>         |                            | 233                         | 42                    |
| <b>Age range</b> |                            | 4.8-16.8 years              | 2-17 years            |
| <b>Child</b>     | Total generic scaled score | 72.2 ± 16.2 (70.1, 74.3)††† | 74.6 ± 15.3           |
|                  | Psychosocial scaled score  | 69.4 ± 18.6 (67.0, 71.8)††† | 71.2 ± 17.1           |
|                  | Physical scaled score      | 76.9 ± 16.7 (74.8, 79.1)††† | 80.8 ± 15.3           |
| <b>Parent</b>    | Total generic scaled score | 65.1 ± 16.0 (63.0, 67.1)    | 75.9 ± 13.4***        |
|                  | Psychosocial scaled score  | 64.1 ± 17.3 (61.9, 66.3)    | 73.7 ± 13.1***        |
|                  | Physical scaled score      | 66.3 ± 20.3 (63.6, 68.9)    | 79.9 ± 17.9***        |

281 \*\*\*p<0.001 for comparison with Whānau Pakari; †††p<0.001 for a difference between child and parental scores

282

283 The Whānau Pakari participants reported similar HRQOL scores to Taranaki youth who were  
 284 predominantly normal weight but with a chronic condition<sup>14</sup> (Table 1). However, youth with  
 285 obesity in Whānau Pakari had consistently lower HRQOL scores than normal-weight Australian  
 286 children (p<0.001; Table 2), and a community sample with obesity.<sup>16</sup> Whānau Pakari parents  
 287 reported that their children had lower HRQOL than those reported by the parents of all three of  
 288 the comparison groups (p<0.001; Tables 1 and 2).

289

290 **Table 2.** Unadjusted PedsQL total generic scaled scores, as well as psychosocial and physical  
 291 scaled scores (out of 100) for Whānau Pakari participants aged 9 to 12 years, compared to  
 292 children and adolescents of two reference populations with a matching age range.<sup>14, 16</sup> Whānau  
 293 Pakari data are mean ± SD (95% confidence interval of the mean), while other data are mean ±  
 294 SD.

|                 |  | Whānau Pakari         | Normal weight        | Obese                |
|-----------------|--|-----------------------|----------------------|----------------------|
| <b>Location</b> |  | Taranaki, New Zealand | Victoria, Australia  | Victoria, Australia  |
| <b>Source</b>   |  | This study            | Williams et al. 2005 | Williams et al. 2005 |
| <b>n</b>        |  | 91                    | 1099                 | 63                   |

| Age range     |                            | 9-12 years                  | 9-12 years     | 9-12 years     |
|---------------|----------------------------|-----------------------------|----------------|----------------|
| <b>Child</b>  | Total generic scaled score | 69.0 ± 15.9 (65.7, 72.3)††† | 80.5 ± 12.2*** | 74.0 ± 14.2*   |
|               | Psychosocial scaled score  | 65.8 ± 18.4 (61.9, 69.6)†   | 77.7 ± 14.1*** | 72.1 ± 14.1*   |
|               | Physical scaled score      | 74.9 ± 15.7 (71.6, 78.2)††† | 85.7 ± 12.4*** | 77.5 ± 17.9    |
| <b>Parent</b> | Total generic scaled score | 63.4 ± 14.0 (60.5, 66.3)    | 83.1 ± 12.5*** | 75.0 ± 14.5*** |
|               | Psychosocial scaled score  | 61.5 ± 15.1 (58.4, 64.7)    | 77.6 ± 14.5*** | 73.9 ± 15.3*** |
|               | Physical scaled score      | 66.7 ± 17.7 (63.0, 70.3)    | 87.8 ± 14.3*** | 76.3 ± 17.6**  |

\*p<0.05, \*\*p<0.01, and \*\*\*p<0.001 for comparison with Whānau Pakari; †p<0.05 and †††p<0.001 for a difference between child and parental scores

Exploratory analyses showed consistent associations between child and parent total generic scaled scores, and certain sociodemographic and clinical parameters, indicating worse overall quality of life with participants who had breathing pauses (p=0.0439 child and p<0.001 parent respectively), reported difficulty getting to sleep (p=0.019 and p<0.001), history of headaches (p=0.023 and p=0.022), developmental problems (p<0.001 and p<0.001), and a father being identified as the sole/primary caregiver as opposed to children living in two-parent families (p=0.010 and p=0.031). In multivariable models, there was evidence that child and parental generic scaled scores decreased in older children ( $\beta$ =-0.70 and p=0.031,  $\beta$ =-0.64 and p=0.047, respectively), but there were no apparent associations with sex, ethnicity, or household deprivation within our cohort.

### Child Behaviour Checklist

Of the total cohort for this study, 232 participants/parents completed the CBCL/YSR. The median CBCL/YSR total score was 58 (interquartile range =15.0). The distribution of participants' scores is shown in Figure 1.

314 **Figure 1.** The frequency distribution of participants according to the Child Behaviour Checklist  
 315 (CBCL) and Youth Self Report (YSR) total scores.

316  
 317 Just over half of the participants had CBCL/YSR total scores in the normal range (56.5%), while  
 318 the remaining 43.5% had scores in the borderline clinical (15.5%) and clinical (28.0%) ranges  
 319 (Figure 1; Table 3). From US normative data previously described, the overall proportion of  
 320 population falling into the borderline clinical or clinical range is  $\leq 7\%$ .<sup>29</sup> This means that  
 321 children in our study had a prevalence of emotional and behavioural problems that was more  
 322 than 6 times higher ( $p < 0.001$ ) than normative populations.

323  
 324 The classification of participants according to individual CBCL/YSR subscales (both parent  
 325 report and youth report) are shown in Table 3. Missing data on subscales for parent report are  
 326 due to the absence of these subscales in the questionnaire for 1.5-5-year-olds. Based on  
 327 CBCL/YSR findings, children and adolescents in our cohort were significantly more likely to  
 328 display emotional and behavioural difficulties than those in the general population. Compared to  
 329 normative data, the proportion of participants in borderline clinical or clinical ranges was  
 330 considerably greater for all subscales (Table 3).

331  
 332 **Table 3.** Proportion of participants with T-scores from Child Behavior Checklist (CBCL)/Youth  
 333 Self Report (YSR) falling into normal, borderline clinical, and clinical ranges at baseline, as per  
 334 parental and youth assessments. Data are n (%).

| Assessment | CBCL/YSR subscale  | n   | Normal <sup>a</sup> | Borderline clinical <sup>b</sup> | Clinical <sup>c</sup> |
|------------|--------------------|-----|---------------------|----------------------------------|-----------------------|
| Parent     | Anxious            | 128 | 110 (85.9%)*        | 8 (6.3%)                         | 10 (7.8%)             |
|            | Withdrawn          | 128 | 92 (71.9%)*         | 26 (20.3%)                       | 10 (7.8%)             |
|            | Somatic complaints | 128 | 98 (76.6%)*         | 20 (15.6%)                       | 10 (7.8%)             |

|              |                        |     |              |            |            |
|--------------|------------------------|-----|--------------|------------|------------|
|              | Social difficulties    | 100 | 70 (7.0%)*   | 20 (20.0%) | 10 (10.0%) |
|              | Thought problems       | 100 | 80 (80.0%)*  | 7 (7.0%)   | 13 (13.0%) |
|              | Attention difficulties | 128 | 110 (85.9%)* | 9 (7.0%)   | 9 (7.0%)   |
|              | Rule breaking          | 100 | 76 (76.0%)*  | 16 (16.0%) | 8 (8.0%)   |
|              | Aggressive             | 128 | 102 (79.7%)* | 18 (14.1%) | 8 (6.3%)   |
|              | Internalising          | 128 | 68 (53.1%)*  | 22 (17.2%) | 38 (29.7%) |
|              | Externalising          | 128 | 72 (56.3%)*  | 24 (18.8%) | 32 (25.0%) |
|              | Total                  | 128 | 71 (55.5%)*  | 19 (14.8%) | 38 (29.7%) |
| <b>Youth</b> | Anxious                | 104 | 88 (84.6%)*  | 12 (11.5%) | 4 (3.9%)   |
|              | Withdrawn              | 104 | 79 (76.0%)*  | 16 (15.4%) | 9 (8.7%)   |
|              | Somatic complaints     | 104 | 79 (76.0%)*  | 15 (14.4%) | 10 (9.7%)  |
|              | Social difficulties    | 104 | 84 (80.8%)*  | 11 (10.6%) | 9 (8.7%)   |
|              | Thought problems       | 104 | 93 (89.4%)*  | 8 (7.7%)   | 3 (2.9%)   |
|              | Attention difficulties | 104 | 81 (77.9%)*  | 15 (14.4%) | 8 (7.7%)   |
|              | Rule breaking          | 104 | 86 (82.7%)*  | 16 (15.4%) | 2 (1.9%)   |
|              | Aggressive             | 104 | 91 (87.5%)*  | 7 (6.7%)   | 6 (5.8%)   |
|              | Internalising          | 104 | 62 (59.6%)*  | 15 (14.4%) | 27 (26.0%) |
|              | Externalising          | 104 | 76 (73.1%)*  | 10 (9.6%)  | 18 (17.3%) |
|              | Total                  | 104 | 60 (57.7%)*  | 17 (16.4%) | 27 (26.0%) |

335 *Note.* <sup>a</sup>< 65 which is below 93<sup>rd</sup> centile

336 <sup>b</sup>65-70 which is 93-98<sup>th</sup> centile (apart from internalising/externalising/total 60-63)

337 <sup>c</sup>>70 which is 98<sup>th</sup> centile (apart from internalising/externalising/total >63)

338 \*\*\*p<0.001 for comparison with normative data (i.e. expected ≤7% of participants in borderline clinical or clinical  
339 ranges combined)

341 Exploratory analyses showed a higher probability of behavioural and emotional problems (as per  
342 CBCL/YSR total scores) in those who experienced breathing pauses (RR 1.52 [95% CI 1.13–

1  
2  
3 343 2.04]) or displayed developmental problems (RR 1.59 [95% CI 1.11–2.27]). Multivariable  
4  
5 344 analyses showed that older age at assessment was associated with higher CBCL/YSR total scores  
6  
7 345 (i.e. worse scores) ( $\beta=0.89$ ;  $p=0.011$ ), while males were more likely to display behavioural and  
8  
9 346 emotional problems than females (RR 1.43 [95% CI 1.06–1.94]).  
10  
11  
12  
13 347

### 14 15 348 **Ethnic comparisons**

16  
17 349 There were no differences between Māori and New Zealand European participants with obesity  
18  
19 350 with respect to the child's reported overall PedsQL scores ( $p=0.09$ ) or PedsQL psychosocial  
20  
21 351 ( $p=0.14$ ) scores, but Māori children reported higher PedsQL physical scores (80.1 versus 74.7,  
22  
23 352 respectively,  $p=0.019$ ). With respect to parental report, there were no ethnic differences in total  
24  
25 353 quality of life ( $p=0.81$ ), psychosocial ( $p=0.76$ ), or physical ( $p=0.53$ ) scores. There were no  
26  
27 354 differences between Māori and New Zealand European participants on CBCL/YSR total  
28  
29 355 ( $p=0.25$ ), internalising ( $p=0.12$ ), or externalising ( $p=0.71$ ) scores.  
30  
31  
32  
33

### 34 356 35 36 357 **DISCUSSION**

37  
38 358  
39  
40  
41 359 The main findings of this study were that children and adolescents with obesity in this region of  
42  
43 360 New Zealand had lower HRQOL on parent report measures when compared with those with a  
44  
45 361 chronic condition (i.e. diabetes that requires daily testing and treatment), and other samples with  
46  
47 362 and without obesity. In addition, a large proportion (43.5%) obtained CBCL/YSR scores in the  
48  
49 363 clinical and borderline range for experiencing psychological problems. The parent report quality  
50  
51 364 of life scores were not dissimilar to those described in children with obesity attending a specialist  
52  
53 365 clinic, and were similar to children and adolescents diagnosed with cancer.<sup>15</sup> The degree to  
54  
55  
56  
57  
58  
59  
60



1  
2  
3 366 which HRQOL appeared to be affected in our cohort was not surprising, given that treatment-  
4  
5 367 seeking parents of children with obesity are more likely to perceive their child as having a poorer  
6  
7  
8 368 HRQOL and more psychological difficulties when compared with parents of children with  
9  
10 369 obesity in the community not seeking treatment.<sup>5,34</sup> Our cohort consisted of participants referred  
11  
12 370 to an obesity intervention programme, so were not a true community-based sample. Nor were  
13  
14 371 they directly comparable to a hospital outpatient clinic population given that Whānau Pakari was  
15  
16 372 specifically designed to address barriers to access which exist for hospital-based outpatient  
17  
18 373 clinical care, particularly for indigenous children.<sup>22</sup> Allowing for this not being a complete non-  
19  
20 374 referred sample, the difference in HRQOL scores in our cohort compared with a large population  
21  
22 375 based study (n=10,241) of predominantly normal weight children aged 2-16 years (mean score  
23  
24 376 65.4 vs. 81.3) is considerable.<sup>35</sup>  
25  
26  
27 377  
28  
29 378 Differences between parent-proxy and child self-report on PedsQL questionnaires have been  
30  
31 379 previously reported. A systematic review of the relationship between parents and children's  
32  
33 380 HRQOL scores found better agreement among parents and chronically sick children than  
34  
35 381 between parents and their healthy children.<sup>36</sup> It was argued that both parent and child reports  
36  
37 382 should be obtained as they provide different perspectives. A further review noted differences in  
38  
39 383 parent-child agreement in HRQOL across four different instruments.<sup>37</sup> The authors suggested  
40  
41 384 that the disagreement was a consequence of varying individual beliefs about the child's health  
42  
43 385 and well-being, rather than parent or child reports being wrong or right.<sup>37</sup> A Norwegian study  
44  
45 386 reviewed this in relation to children and adolescents seeking treatment for obesity versus a  
46  
47 387 community sample of children of any BMI.<sup>34</sup> Parents reported the quality of life of the children  
48  
49 388 with obesity seeking treatment as lower than those in the community, which was not seen with  
50  
51  
52  
53  
54  
55  
56  
57  
58  
59  
60

1  
2  
3 389 the child self-report.<sup>34</sup> Pooled analyses however showed that paediatric HRQOL can be  
4  
5 390 accurately predicted from parent proxy reports with moderate to strong linear relationships  
6  
7  
8 391 between the two methods of report.<sup>5</sup>  
9

10 392  
11  
12 393 We observed that psychological difficulties were prevalent in our cohort. Our participants aged  
13  
14 394 11 to 18 years reported a mean total YSR score of 55.9 (SD=10.6), which is similar to a small  
15  
16 395 non-clinical group of adolescents with obesity from Turkey (n=30) with a total problem score of  
17  
18 396 58.2 (SD=7.7).<sup>19</sup> We have no national data for comparison with CBCL/YSR, but there is nothing  
19  
20 397 to suggest that scores in the Taranaki region would be higher than those nationally, and there is  
21  
22 398 no known biological or environmental reason for this cohort to have higher rates of mental health  
23  
24 399 problems outside of their obesity. The absence of Paediatric psychology services are a notable  
25  
26 400 issue in the region (child and adolescent mental health services are available), and it is unclear if  
27  
28 401 this may contribute to these findings. The randomised clinical trial we are undertaking will be  
29  
30 402 able to assess if the intervention can address the relationships between these variables over time.  
31  
32 403  
33  
34  
35

36  
37 404 Obesity in childhood is a major health concern in New Zealand, with the third highest prevalence  
38  
39 405 of overweight and obesity in the OECD (Organisation for Economic Co-operation and  
40  
41 406 Development).<sup>38</sup> Recent studies in this cohort of children and adolescents with obesity have  
42  
43 407 found suboptimal eating behaviour,<sup>39</sup> suboptimal physical activity,<sup>40</sup> and a high prevalence of  
44  
45 408 weight-related comorbidities, including hypertension and obstructive sleep apnoea.<sup>33</sup> We were  
46  
47 409 not surprised that breathing pauses were associated with poorer HRQOL and higher total scores  
48  
49 410 on the CBCL/YSR. Breathing pauses in children and adolescents with obesity are associated  
50  
51 411 with obstructive sleep apnoea,<sup>41</sup> and children and adolescents with obesity with this condition  
52  
53  
54  
55  
56  
57  
58  
59  
60

1  
2  
3 412 have reported lower HRQOL total scores than peers with obesity without the condition.<sup>15</sup>  
4  
5 413 Moderate to severe obstructive sleep apnoea is associated with increased rates of aggressive  
6  
7 414 behaviour, attention problems, and internalising problems on the CBCL.<sup>42</sup> These observations  
8  
9 415 are important, given the considerable prevalence of breathing pauses reported in this cohort with  
10  
11 416 obesity,<sup>33</sup> and the wider impact of obstructive sleep apnoea on a child's health, cognitive and  
12  
13 417 behavioural functioning.<sup>43</sup>  
14  
15  
16  
17  
18 418

19  
20 419 Strengths of this study are that it is the first to report HRQOL in children and adolescents with  
21  
22 420 obesity in the New Zealand population. Due to the high participation rate from Māori, we were  
23  
24 421 also able to undertake evaluation of the impact of ethnicity. What was interesting and important  
25  
26 422 about our findings in terms of ethnicity was the lack of disparity in HRQOL scores. This was  
27  
28 423 despite a larger proportion of Māori participants being from the most deprived quintile of  
29  
30 424 households. It therefore appears that obesity itself rather than factors such as deprivation is the  
31  
32 425 main identified factor in our participants contributing to lower HRQOL scores. This finding is in  
33  
34 426 contrast to previous research in Fiji and Kuwait, where there was no meaningful negative  
35  
36 427 association between increased weight and HRQOL in children aged 12-18 in Fiji, irrespective of  
37  
38 428 ethnicity, or Kuwaiti nationals, aged 10-14 years old.<sup>7,8</sup> The discrepancies in results may be  
39  
40 429 explained by this study reviewing a treatment-seeking group, rather than population-based  
41  
42 430 sample, and the different cultural values assigned to body size in Fiji and Kuwait compared with  
43  
44 431 New Zealand (a westernised society).  
45  
46  
47  
48  
49

50 432  
51  
52  
53 433 A limitation of this study, as with all HRQOL assessments, is the use of an assessment tool to  
54  
55 434 extrapolate one's psychological health and well-being. Comparisons of our study have been  
56  
57  
58  
59  
60

1  
2  
3 435 made with population groups of varying age ranges, which may have affected results. Another  
4  
5 436 limitation of this study is that this was a referred cohort, which means our findings are not  
6  
7  
8 437 necessarily representative of the general population. We compared our data with the Health of  
9  
10 438 Young Victorians cohort from Australia, as this was the most comparable group we had access  
11  
12  
13 439 to. However, the data were collected in 2000, and the differences noted may have been impacted  
14  
15 440 by the difference in dates of data collection. Mean BMI SDS for the Victorian cohort with  
16  
17 441 obesity was not available, which would be important if it was considerably lower than the  
18  
19  
20 442 Whānau Pakari participants. Lastly, we made no adjustments for multiple comparisons in our  
21  
22 443 statistical analyses, so that the findings (particularly from exploratory analyses) need to be  
23  
24 444 interpreted accordingly.  
25  
26

27 445  
28  
29 446 In conclusion, this study highlights a lower HRQOL and a higher prevalence of psychological  
30  
31 447 difficulties for this referred community-based group of children and adolescents with obesity  
32  
33  
34 448 compared with normative population data. No differences were found between Māori and New  
35  
36 449 Zealand Europeans. This is despite Māori being represented in greater numbers in the more  
37  
38  
39 450 deprived households of the region compared with their non-Māori counterparts, suggesting that  
40  
41 451 obesity itself rather than deprivation is the main contributor to lower HRQOL scores. This study  
42  
43 452 highlights the importance of psychologist involvement and screening in the child and adolescent  
44  
45  
46 453 population with obesity as part of any multi-disciplinary team. Improvement in HRQOL should  
47  
48 454 be considered a goal of all child and adolescent obesity intervention and management. Further  
49  
50 455 research is required to ascertain how to maximise improvements in what is now recognised as an  
51  
52  
53 456 important health outcome.  
54

55 457  
56  
57  
58  
59  
60

1  
2  
3 458 **Acknowledgements**  
4

5 459 The authors would like to acknowledge Dr John Doran (Taranaki District Health Board), Diana  
6  
7  
8 460 O'Neill, and Dr Pat Tuohy (Ministry of Health) for their support of the trial; Taranaki District  
9  
10 461 Health Board and Sport Taranaki for funding of the clinical service, and Gerard Dolan and Dr  
11  
12 462 Rebecca Storey for their assistance with initial methodology surrounding psychology  
13  
14 463 questionnaires. The Quality of Life study described in this paper was carried out using the  
15  
16 464 PedsQL™, developed by Dr James W. Varni.  
17  
18  
19

20 465

21  
22 466 **Funding statement**  
23

24 467 This work has been funded by grants from the Health Research Council of New Zealand, Royal  
25  
26 468 Australasian College of Physicians, the Maurice and Phyllis Paykel Trust, Taranaki Medical  
27  
28 469 Foundation, and Lotteries Health Research.  
29  
30  
31

32 470

33  
34 471 **Competing interests**  
35

36 472 All authors have completed the ICMJE uniform disclosure at [www.icmje.org/coi\\_disclosure.pdf](http://www.icmje.org/coi_disclosure.pdf)  
37  
38 473 and declare: financial support for the submitted work from the Health Research Council of New  
39  
40 474 Zealand, Royal Australasian College of Physicians, the Maurice and Phyllis Paykel Trust,  
41  
42 475 Taranaki Medical Foundation, and Lotteries Health Research; YCA and PLH have been  
43  
44 476 recipients of these grants to undertake clinical research in relation to Whānau Pakari, YCA has  
45  
46 477 been paid in a fellowship capacity from the Health Research Council of New Zealand, TLC has  
47  
48 478 been paid as a research assistant, JGBD has been paid for data analysis.  
49  
50  
51

52 479

53  
54  
55 480 **Contributorship statement**  
56  
57  
58  
59  
60

1  
2  
3 481 YCA designed the study, was involved with data interpretation, and drafted this manuscript.  
4  
5  
6 482 LEW recruited participants, and undertook assessments and data entry. KFT provided  
7  
8 483 psychologist oversight and analysis of patient data. CCG is secondary supervisor for the research  
9  
10 484 team, and assisted with the interpretation of the study. JMS was involved in study design. TLC  
11  
12 485 assisted with data entry and analysis. TAW was involved in interpretation of data. JGBD  
13  
14 486 analysed the data and drafted the manuscript. WSC contributed to study design. PLH contributed  
15  
16 487 to study design and supervises the research team. All authors critically revised the manuscript,  
17  
18 488 gave final approval for the version to be published, and are accountable for all aspects of the  
19  
20 489 work.  
21  
22  
23  
24  
25  
26

#### 27 491 **Data sharing statement**

28  
29 492 Data cannot be made available in a public repository due to the strict conditions of the ethics  
30  
31 493 approval of this study. Nonetheless, anonymised and de-identified data will be made available to  
32  
33 494 other investigators upon request. Interested readers should contact the senior author Prof Paul  
34  
35 495 Hofman (p.hofman@auckland.ac.nz) to obtain the data.  
36  
37  
38  
39  
40  
41

#### 42 497 **References**

- 43  
44  
45  
46 498 1. Lakshman R, Elks CE, Ong KK. Childhood obesity. *Circulation* 2012;126(14):1770-9.  
47  
48  
49 499 2. Smylie J, Adomako P. *Indigenous children's health report: Health assessment in action*.  
50  
51 Toronto: The Centre for Research on Inner City Health; 2009 [accessed 16 Nov 2014]. Available  
52  
53 500 from: [http://www.stmichaelshospital.com/crich/wp-content/uploads/ichr\\_report-web.pdf](http://www.stmichaelshospital.com/crich/wp-content/uploads/ichr_report-web.pdf)  
54  
55 501  
56  
57  
58  
59  
60

- 1  
2  
3 502 3. Ministry of Health, New Zealand. *Annual Update of Key Results 2014/2015: New Zealand*  
4  
5 503 *Health Survey*. Wellington, New Zealand: Ministry of Health, 2015 [accessed 12 Apr 2016].  
6  
7 504 Available from: <http://www.health.govt.nz/system/files/documents/publications/annual-update->  
8  
9 505 [key-results-2014-15-nzhs-dec15-1.pdf](http://www.health.govt.nz/system/files/documents/publications/annual-update-key-results-2014-15-nzhs-dec15-1.pdf)  
10  
11  
12  
13  
14 506 4. Twig G, Yaniv G, Levine H, *et al*. Body-mass index in 2.3 million adolescents and  
15  
16 507 cardiovascular death in adulthood. *N Engl J Med* 2016;374:2430-40.  
17  
18  
19  
20 508 5. Tsiros MD, Olds T, Buckley JD, *et al*. Health-related quality of life in obese children and  
21  
22 509 adolescents. *Int J Obes (Lond)* 2009;33(4):387-400.  
23  
24  
25  
26 510 6. Omma L, Petersen S. Health-related quality of life in indigenous Sami schoolchildren in  
27  
28 511 Sweden. *Acta Paediatr* 2015;104(1):75-83.  
29  
30  
31  
32 512 7. Petersen S, Moodie M, Mavoja H, *et al*. Relationship between overweight and health-related  
33  
34 513 quality of life in secondary school children in Fiji: Results from a cross-sectional population-  
35  
36 514 based study. *Int J Obes (Lond)* 2014;38(4):539-46.  
37  
38  
39  
40 515 8. Boodai SA, Reilly JJ. Health related quality of life of obese adolescents in Kuwait. *BMC*  
41  
42 516 *Pediatr* 2013;13:105.  
43  
44  
45  
46 517 9. Varni JW, Limbers CA. The PedsQL™ 4.0 generic core scales young adult version:  
47  
48 518 Feasibility, reliability and validity in a university student population. *J Health Psychol*  
49  
50 519 2009;14(4):611-22.  
51  
52  
53  
54  
55  
56  
57  
58  
59  
60

- 1  
2  
3 520 10. Varni JW, Seid M, Kurtin PS. PedsQL 4.0: Reliability and validity of the pediatric quality of  
4  
5 521 life inventory version 4.0 generic core scales in healthy and patient populations. *Med Care*  
6  
7 522 2001;39(8):800-12.  
8  
9  
10  
11 523 11. Varni JW, Seid M, Rode CA. The PedsQL: Measurement model for the pediatric quality of  
12  
13 524 life inventory. *Med Care* 1999;37(2):126-39.  
14  
15  
16  
17 525 12. Chan KS, Mangione-Smith R, Burwinkle TM, *et al.* The PedsQL: Reliability and validity of  
18  
19 526 the short-form generic core scales and asthma module. *Med Care* 2005;43(3):256-65.  
20  
21  
22  
23 527 13. Varni JW, Seid M, Knight TS, *et al.* The PedsQL™ 4.0 generic core scales: Sensitivity,  
24  
25 528 responsiveness, and impact on clinical decision-making. *J Behav Med* 2002;25(2):175-93.  
26  
27  
28  
29 529 14. Mills SA, Hofman PL, Jiang Y, *et al.* Health-related quality of life of Taranaki children with  
30  
31 530 type 1 diabetes. *NZ Med J* 2015;128(1427):25-32.  
32  
33  
34  
35 531 15. Schwimmer JB, Burwinkle TM, Varni JW. Health-related quality of life of severely obese  
36  
37 532 children and adolescents. *JAMA* 2003;289(14):1813-9.  
38  
39  
40  
41 533 16. Williams J, Wake M, Hesketh K, *et al.* Health-related quality of life of overweight and obese  
42  
43 534 children. *JAMA* 2005;293(1):70-6.  
44  
45  
46  
47 535 17. Giel KE, Zipfel S, Schweizer R, *et al.* Eating disorder pathology in adolescents participating  
48  
49 536 in a lifestyle intervention for obesity: Associations with weight change, general psychopathology  
50  
51 537 and health-related quality of life. *Obes Facts* 2013;6(4):307-16.  
52  
53  
54  
55  
56  
57  
58  
59  
60



- 1  
2  
3 538 18. Pervanidou P, Bastaki D, Chouliaras G, *et al.* Internalizing and externalizing problems in  
4  
5 539 obese children and adolescents: Associations with daily salivary cortisol concentrations.  
6  
7 540 *Hormones* 2015;14(4):623-31.  
8  
9  
10  
11 541 19. Erermis S, Cetin N, Tamar M, *et al.* Is obesity a risk factor for psychopathology among  
12  
13 542 adolescents? *Pediatr Int* 2004;46(3):296-301.  
14  
15  
16  
17 543 20. Lim CS, Espil FM, Viana AG, *et al.* Associations between anxiety symptoms and child and  
18  
19 544 family factors in pediatric obesity. *J Dev Behav Pediatr* 2015;36(9):664-72.  
20  
21  
22  
23 545 21. Foster Page LA, Thomson WM. Caries prevalence, severity, and 3-year increment, and their  
24  
25 546 impact upon New Zealand adolescents' oral-health-related quality of life. *J Public Health Dent*  
26  
27 547 2012;72(4):287-94.  
28  
29  
30  
31 548 22. Anderson YC, Wynter LE, Moller KR, *et al.* The effect of a multi-disciplinary obesity  
32  
33 549 intervention compared to usual practice in those ready to make lifestyle changes: Design and  
34  
35 550 rationale of Whanau Pakari. *BMC Obesity* 2015;2(41). doi: 10.1186/s40608-015-0068-y  
36  
37  
38  
39 551 23. Statistics New Zealand. Census 2013: Ethnic group by age group and sex [Internet].  
40  
41 552 Wellington: Statistics New Zealand [accessed 18 November 2014]. Available from:  
42  
43 553 <http://nzdotstat.stats.govt.nz/wbos/Index.aspx?DataSetCode=TABLECODE8021#>.  
44  
45  
46  
47  
48 554 24. Cole TJ. A chart to link child centiles of body mass index, weight and height. *Eur J Clin Nutr*  
49  
50 555 2002;56(12):1194-9.  
51  
52  
53  
54 556 25. Freeman JV, Cole TJ, Chinn S, *et al.* Cross sectional stature and weight reference curves for  
55  
56 557 the UK, 1990. *Arch Dis Child* 1995;73(1):17-24.  
57  
58  
59  
60

- 1  
2  
3 558 26. University of Otago - School of Medicine and Health Science, New Zealand. NZ Deprivation  
4  
5  
6 559 Index 2006 [Internet] [accessed 03 Nov 2014]. Available from:  
7  
8 560 <https://koordinates.com/layer/1066-nz-deprivation-index-2006/>.  
9  
10  
11 561 27. Varni JW, Burwinkle TM, Seid M, *et al*. The PedsQL 4.0 as a pediatric population health  
12  
13  
14 562 measure: Feasibility, reliability, and validity. *Ambul Pediatr* 2003;3(6):329-41.  
15  
16  
17 563 28. Achenbach TM, Ruffle TM. The child behavior checklist and related forms for assessing  
18  
19  
20 564 behavioral/emotional problems and competencies. *Pediatr Rev* 2000;21(8):265-71.  
21  
22  
23 565 29. Achenbach TM, Rescorla LA. Manual for the ASEBA school-aged forms and profiles.  
24  
25  
26 566 Research Centre for Children, Youth & Families. Burlington: University of Vermont, 2001.  
27  
28  
29 567 30. Jansen PW, Mensah FK, Clifford S, *et al*. Bidirectional associations between overweight and  
30  
31  
32 568 health-related quality of life from 4-11 years: Longitudinal study of Australian children. *Int J*  
33  
34 569 *Obes (Lond)* 2013;37(10):1307-13.  
35  
36  
37 570 31. Ministry of Health, New Zealand. Population of Taranaki DHB [Internet]. Wellington, New  
38  
39  
40 571 Zealand; 2015 [accessed 26 Jan 2015]. Available from: [http://www.health.govt.nz/new-zealand-](http://www.health.govt.nz/new-zealand-health-system/my-dhb/taranaki-dhb/population-taranaki-dhb)  
41  
42 572 [health-system/my-dhb/taranaki-dhb/population-taranaki-dhb](http://www.health.govt.nz/new-zealand-health-system/my-dhb/taranaki-dhb/population-taranaki-dhb).  
43  
44  
45  
46 573 32. Atkinson J, Salmond C, Crampton C. NZDep2013 Index of Deprivation [Internet].  
47  
48 574 Wellington, New Zealand; University of Otago 2014 [accessed 03 Apr 2016]. Available from:  
49  
50 575 <http://www.otago.ac.nz/wellington/otago069936.pdf>.  
51  
52  
53  
54  
55  
56  
57  
58  
59  
60

- 1  
2  
3 576 33. Anderson YC, Wynter LE, Treves KF, *et al.* Prevalence of comorbidities in obese New  
4  
5 577 Zealand children and adolescents at enrolment in a community-based obesity programme. *J*  
6  
7 578 *Paediatr Child Health* 2016;52(12):1099-105. doi:10.1111/jpc.13315  
8  
9  
10  
11 579 34. Steinsbekk S, Jozefiak T, Odegard R, *et al.* Impaired parent-reported quality of life in  
12  
13 580 treatment-seeking children with obesity is mediated by high levels of psychopathology. *Qual*  
14  
15 581 *Life Res* 2009;18(9):1159-67.  
16  
17  
18  
19  
20 582 35. Seid M, Varni JW, Cummings L, *et al.* The impact of realized access to care on health-  
21  
22 583 related quality of life: A two-year prospective cohort study of children in the California state  
23  
24 584 children's health insurance program. *J Pediatr* 2006 9;149(3):354-61.  
25  
26  
27  
28 585 36. Eiser C, Morse R. Can parents rate their child's health-related quality of life? Results of a  
29  
30 586 systematic review. *Qual Life Res* 2001;10(4):347-57.  
31  
32  
33  
34 587 37. Upton P, Lawford J, Eiser C. Parent-child agreement across child health-related quality of  
35  
36 588 life instruments: A review of the literature. *Qual Life Res* 2008;17(6):895-913.  
37  
38  
39  
40 589 38. Organisation for Economic Co-operation and Development (OECD). Obesity update 2014.  
41  
42 590 France: Secretary-General of the OECD 2014 [accessed 21 Feb 2015]. Available from:  
43  
44 591 <http://www.oecd.org/els/health-systems/Obesity-Update-2014.pdf>  
45  
46  
47  
48 592 39. Anderson YC, Wynter LE, Butler M, *et al.* Dietary intake and eating behaviours of obese  
49  
50 593 New Zealand children and adolescents enrolled in a community-based intervention programme.  
51  
52 594 *PLoS ONE* 2016;11(11). doi:10.1371/journal.pone.0166996  
53  
54  
55  
56  
57  
58  
59  
60

1  
2  
3 595 40. Anderson YC, Wynter LE, Butler M, *et al.* Physical activity is low in obese New Zealand  
4  
5 596 children and adolescents. *Sci Rep* 2017;7(41822).

7  
8  
9 597 41. Section on Pediatric Pulmonology, Subcommittee on Obstructive Sleep Apnea Syndrome.  
10  
11 598 American Academy of Pediatrics. Clinical practice guideline: Diagnosis and management of  
12  
13 599 childhood obstructive sleep apnea syndrome. *Pediatrics* 2002;109(4):704-12.

14  
15  
16  
17 600 42. Bourke RS, Anderson V, Yang JSC, *et al.* Neurobehavioral function is impaired in children  
18  
19 601 with all severities of sleep disordered breathing. *Sleep Med* 2011;12(3):222-9.

20  
21  
22  
23 602 43. Schechter MS, Section on Pediatric Pulmonology, Subcommittee on Obstructive Sleep  
24  
25 603 Apnea Syndrome. Technical report: Diagnosis and management of childhood obstructive sleep  
26  
27 604 apnea syndrome. *Pediatrics* 2002;109(4):e69.

28  
29  
30  
31  
32 605

33  
34  
35 606  
36  
37  
38  
39  
40  
41  
42  
43  
44  
45  
46  
47  
48  
49  
50  
51  
52  
53  
54  
55  
56  
57  
58  
59  
60

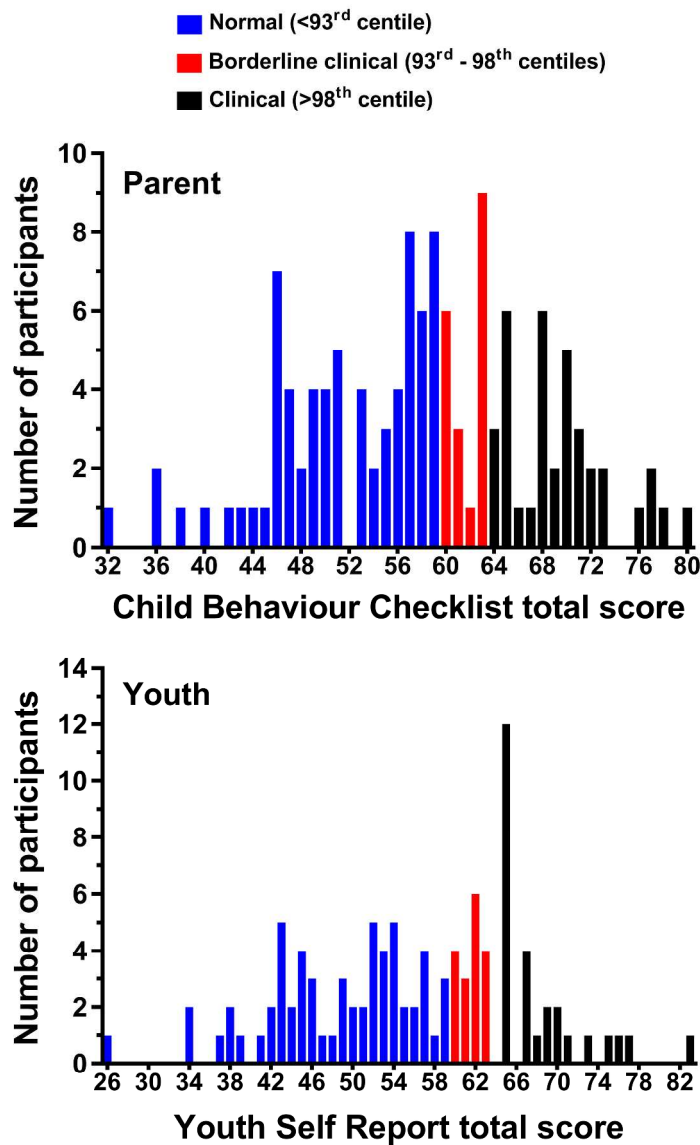

Figure 1. The frequency distribution of participants according to the Child Behaviour Checklist (CBCL) and Youth Self Report (YSR) total scores.

268x387mm (300 x 300 DPI)

## STUDY PROTOCOL

## Open Access

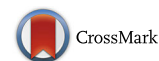

# The effect of a multi-disciplinary obesity intervention compared to usual practice in those ready to make lifestyle changes: design and rationale of Whanau Pakari

Yvonne C. Anderson<sup>1,2\*</sup>, Lisa E. Wynter<sup>1</sup>, Kris R. Moller<sup>3</sup>, Tami L. Cave<sup>2</sup>, Gerard M. S. Dolan<sup>1</sup>, Cameron C. Grant<sup>4,5,6</sup>, Joanna M. Stewart<sup>7</sup>, Wayne S. Cutfield<sup>2,6</sup> and Paul L. Hofman<sup>2,6</sup>

## Abstract

**Background:** Child obesity internationally has been identified as one of the major threats to future population health. Indigenous people and those from lower socio-economic backgrounds are over-represented in obesity statistics. There is a need for evidence of effect of interventions for child obesity with long-term follow-up. Whether engaging with those that are more motivated to make lifestyle changes is a useful strategy has not been fully explored. We hypothesise that in obese/overweight children, assessed as psychologically “ready for change”, delivery of a 12-month multi-disciplinary intervention programme results in a significant reduction in body mass index standard deviation score.

**Methods/Design:** Whanau Pakari is an unblinded randomised controlled clinical trial comparing a 12 month intervention programme with standard practice, with 6 monthly assessments for 2 years, conducted in Taranaki, New Zealand (a region where 15.8 % of the population are indigenous). It specifically targets indigenous people and those in more deprived households.

Obese/overweight children and adolescents aged 5–16 years are eligible. Exclusion criteria are medical/psychological conditions leading to inability to undertake physical activity/participate in group sessions; those not “ready” to make lifestyle changes; and those without a committed family member.

Assessments of health parameters, dietary history, physical activity and overall health-related quality of life/psychological functioning are completed in the participant’s home. Fasting blood tests are obtained at baseline, 12 and 24 months. The primary outcome is body mass index standard deviation score. Secondary outcomes include quality of life, dietary behaviour and physical activity, cardiovascular and metabolic profile (blood pressure, resting heart rate, waist circumference), glycaemic control (fasting glucose and glycated Haemoglobin), fasting insulin, and lipids.

A general linear mixed model will be used to assess change from baseline using the 6, 12, 18 and 24 month measures, adjusting for age, gender, socioeconomic status and ethnicity, and whether at the contemplative or preparation/action stages of readiness for change.

**Discussion:** This trial will inform the development of management programmes for obese children and adolescents that are appropriate for indigenous populations. It will investigate whether those at the preparation/action stage of “readiness” to make lifestyle changes are more successful in making changes than those who are contemplative.

(Continued on next page)

\* Correspondence: yvonne.anderson@tdhb.org.nz

<sup>1</sup>Taranaki District Health Board, New Plymouth, New Zealand

<sup>2</sup>The Liggins Institute, The University of Auckland, Auckland, New Zealand

Full list of author information is available at the end of the article

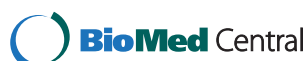

© 2015 Anderson et al. **Open Access** This article is distributed under the terms of the Creative Commons Attribution 4.0 International License (<http://creativecommons.org/licenses/by/4.0/>), which permits unrestricted use, distribution, and reproduction in any medium, provided you give appropriate credit to the original author(s) and the source, provide a link to the Creative Commons license, and indicate if changes were made. The Creative Commons Public Domain Dedication waiver (<http://creativecommons.org/publicdomain/zero/1.0/>) applies to the data made available in this article, unless otherwise stated.

(Continued from previous page)

**Trial registration:** Australian New Zealand Clinical Trials Registry (ANZCTR):12611000862943. (Date registered 15/08/2011).

**Keywords:** Pediatric, Obesity, Research methods, Indigenous people, Whanau Pakari, Intervention studies, Randomised controlled trials, Nutrition, Physical activity, Body mass index

## Background

Childhood obesity causes substantial morbidity, mortality and health cost [1, 2]. The rapid increases in the proportion of the population that are overweight and obese are now apparent in children as well as adults in both developed and developing countries [1, 3]. New Zealand has not avoided the global obesity epidemic, with the country now being ranked fourth in the Organisation for Economic Cooperation and Development (OECD) rankings for overweight and obesity (65 % of the population over 15 years are classed as either overweight or obese) [4]. The Health of New Zealand Children Survey 2013/2014 reported 10 % of children aged 5–14 years are obese, up from 8 % in 2006/2007 [5]. Rates of obesity are higher for Maori – New Zealand's Indigenous population (15 %), Pacific Island children (25 %), and children living in the most deprived quintile of households (18 %) [5].

Few children and adolescents struggling with weight issues have access to intervention programmes. In New Zealand, most overweight or obese children and adolescents coming to the attention of medical professionals are either managed by a general practitioner or general paediatrician with minimal intervention programmes being available nationally [6]. No national cohesive approach for managing childhood obesity exists, despite national clinical guidelines being available since 2009 [7]. A recent multi-centre audit showed that, irrespective of type of intervention, a small but significant reduction in BMI SDS was achievable (–0.15 overall), highlighting the importance of health professionals being proactive in identifying and addressing child obesity [8]. However, even when obesity is identified, intervention is infrequently implemented. In Australia, general practitioners were recently shown to provide weight management for <2 % of overweight and obese children attending primary care services [9], and paediatricians reported lacking confidence in the management of obesity in children, with only 37 % reporting training in the management of obesity-related comorbidities [10]. This is also likely to be the situation in New Zealand, although to date, similar surveys remain unpublished.

Past meta-analyses have supported multi-disciplinary intervention programmes for addressing child and adolescent obesity, as they are deemed as having the greatest chance of success [11, 12]. New Zealand's Ministry of Health guidelines support an approach of working with

family to address food habits, increase physical activity and to promote behavioural change [7]. Evolution of the current trial came from these recommendations, findings from an audit of an existing physical activity/nutrition programme [6] and recognition of the need to address accessibility for those most affected by obesity. A trial was deemed necessary to ensure future decision-making with regard to child and adolescent obesity was informed by the most reliable evidence possible. The trial has been designed with consideration of the Consolidated Standards of Reporting Trials (CONSORT) 2010 statement [13].

It was clear in the pre-existing regional programme that the lack of a measure for assessing a participant's psychological "readiness" to make lifestyle changes was affecting interpretation of the outcomes of the programme overall [6]. Whilst most clinical practitioners assess readiness to make lifestyle changes in their patients on a daily basis, this is a poorly defined process. Historically, readiness for change (RFC) has been utilised qualitatively in some obesity services. It is a concept that has developed from the transtheoretical model defining stages of behavioural change around addiction [14]. When deciding to undertake behavioural change, an individual moves through defined stages at different rates and not always in a linear fashion (Table 1). However, an individual's readiness to change may be behaviour-specific, so it is unclear whether a participant's "readiness" may equate to global changes related to improving lifestyle. In the original readiness for change questionnaire directed towards excessive alcohol use, this was somewhat mitigated by the use of multiple descriptive statements across pre-contemplation, contemplation and action [15].

The transtheoretical model has been used to assess individual's motivation for smoking cessation [16], and various tools for readiness for change have been trialled in the obesity setting [17, 18]. The utility of readiness for change remains unclear as it relates to obesity services, and it is too simplistic to expect that every individual would move through these stages in a similar fashion. However, previous studies have highlighted the importance of tailoring interventions to the individual stage of change rather than treating all participants as if they are in preparation or action stages [17]. If there were a quantitative tool that could predict likelihood of success at initial assessment, this would potentially focus health resource where it was most likely to make a difference. Given the complexity



**Table 1** Theoretical model of stages of readiness for change [14]

| Stage             | Description                                         |
|-------------------|-----------------------------------------------------|
| Pre-contemplation | "I do not have a problem"                           |
| Contemplation     | "I may have a problem"                              |
| Preparation       | "I may have a problem and need to do something"     |
| Action            | "I will try these changes"                          |
| Maintenance       | "The changes I have made are now part of what I do" |

of behaviour change as it relates to obesity, the original readiness for change questionnaire [15] would require modification and expansion to include questions regarding eating behaviour, attitude towards weight and physical activity behaviour. Confidence to make changes in physical activity and eating behaviour would also need to be considered.

The question remains as to whether an individual's readiness in the "snapshot" situation of an assessment translates to ongoing motivation to make lifestyle changes over time. In the domain of child and adolescent obesity, parental readiness is a vital factor in a child or adolescent's success in making and maintaining lifestyle changes. If a parent believes their child's weight is a problem, or that they as parents are overweight, they are more likely to be ready to make lifestyle changes for their child [18].

"Whanau Pakari" means "healthy self-assured families that are fully active" in Maori, and was the name gifted to the trial by a prominent Maori community representative. The trial assesses a new mainstream clinical service delivered in an innovative way in order to improve access for Maori, and those from lower socioeconomic backgrounds. Previous child obesity services in the region involved the traditional model of medical referral to a Paediatrician, sometimes with the addition of dietitian input, and physical activity programme input. The physical activity programme, run in the community through the regional sports trust with a maximum number of participants per year, did not specifically target high-risk groups, and was not region-wide [6]. The new programme removes the "hospital visit", but participants continue to receive support and oversight from a Paediatrician. This multi-disciplinary programme incorporates three novel approaches:

1. It provides a trained roving community coordinator to meet families in their homes, enabling improved access to the clinical service, especially for Maori.
2. It assesses "readiness for change" both quantitatively and qualitatively.
3. It provides follow up to 12 months post intervention to assess persistence of lifestyle changes, which is longer than any other multi-disciplinary obesity intervention model trialled in New Zealand.

There is a clear need for evidence-based interventions for child obesity that demonstrate on-going effectiveness [11]. Whether engaging with those that are more motivated to make lifestyle changes is a strategy that warrants further exploration. Our objectives are firstly, to undertake a multi-disciplinary intervention, which is accessible and appropriate for those most affected by child obesity. Secondly, we aim to assess whether a quantitative RFC questionnaire is useful in predicting response to the intervention. We hypothesise that in obese/overweight children, assessed as psychologically "ready for change", delivery of a 12-month multi-disciplinary intervention programme results in a significant reduction in body mass index standard deviation score at 12 months.

### Methods/Design

Whanau Pakari is an unblinded randomised controlled clinical trial being conducted in Taranaki, New Zealand (population 23,139 children aged 0–15 years, of which 28 % are Maori) [19]. Ethical approval was granted by the Health and Disability Ethics Committee (Ministry of Health, New Zealand; CEN/11/09/054), and the trial was registered with the Australian New Zealand Clinical Trials Registry (ANZCTR: 12611000862943). Locality approval has been obtained from Sport Taranaki, and the Taranaki District Health Board.

### Participants

Children from the Taranaki region aged 5–16 years, with a body mass index (BMI)  $\geq$ 98th centile, or those  $>$ 91st centile with weight related comorbidities will be offered participation in the trial if referred to "Whanau Pakari". These cut-offs are a modification of UK Cole data, and have been chosen as they are nationally accepted for use by the Ministry of Health for defining obesity and overweight respectively in the community for 0–5 years [20, 21]. (There are no nationally accepted growth charts or official cut-offs in use for  $>$ 5 year old children currently.)

Exclusion criteria will be significant medical or psychological conditions leading to inability to undertake physical activity or participate in group sessions; those not "ready" to make lifestyle changes; and those without a committed family member (essential to support the family-based approach of the programme).

To optimise accessibility, referrals will be accepted from all health professionals within the community, including public health nurses in schools, and Maori health workers. Self-referrals will also be accepted (Fig. 1).

### Recruitment

Recruitment for the trial will be through the service, which is being advertised across Taranaki through multiple channels, including referrer training half-days (training sessions about the service, and how to have conversations about



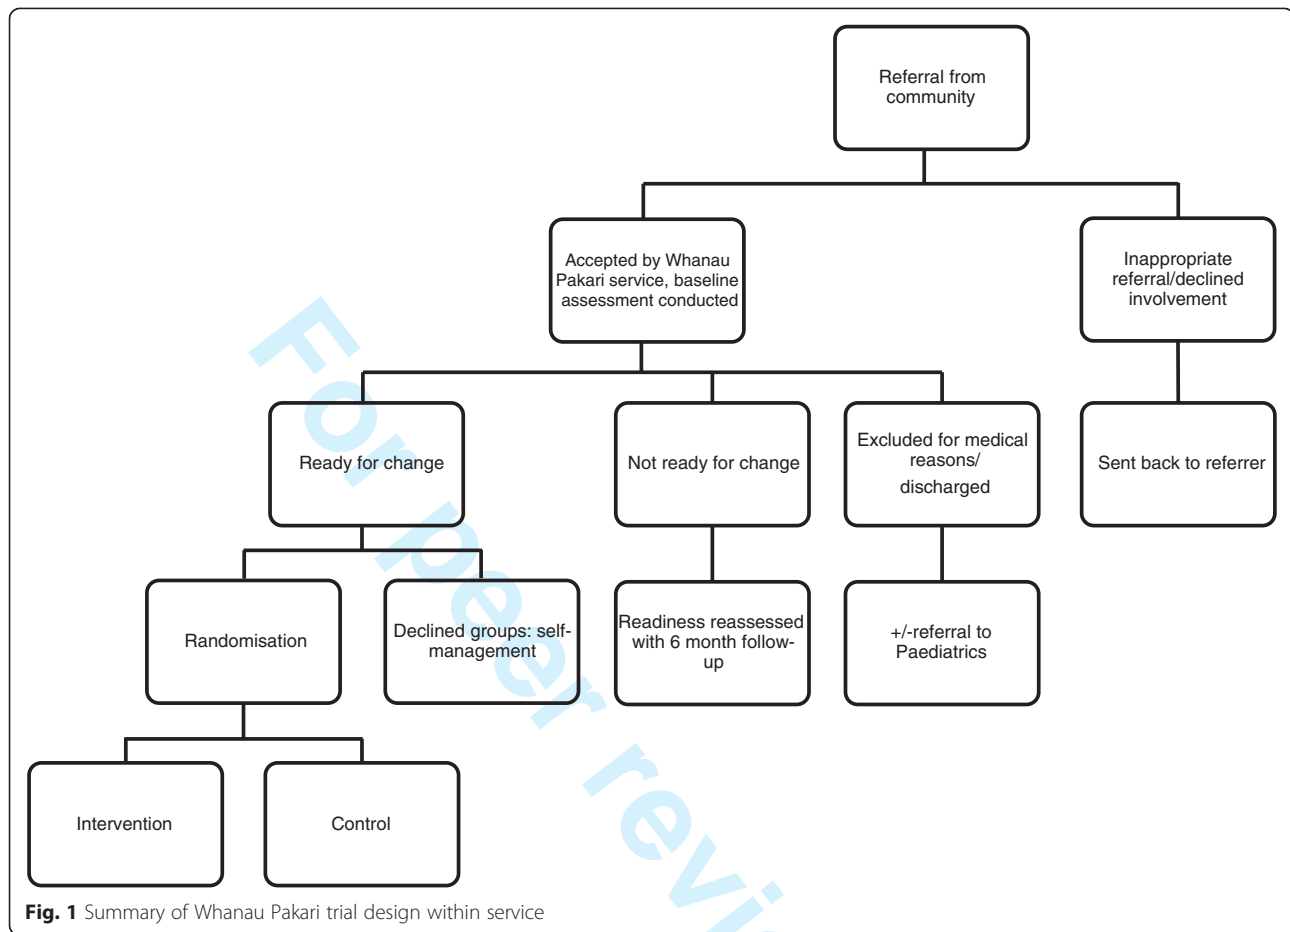

weight with families), meetings (hui) with all stakeholders, general practice visits, school visits, media releases, pamphlet drops at public places and events, and the Public Health Unit of Taranaki District Health Board.

Whilst the trial will assess a “mainstream” clinical service, the aim is to target Maori and the most deprived in the community. To achieve this aim we will use identified facilitators that enable Indigenous people’s participation such as relationship and partnership building, involvement of Indigenous staff, the use of Indigenous knowledge models (such as He Korowai Oranga: the Maori Health strategy and the Whanau Ora [healthy families] tool) [22, 23], targeted recruitment techniques (such as working with Maori health workers within the community to engage with families) and adapting study material [24].

All children referred will be seen in the family (whanau) home by the Healthy Lifestyles Coordinator (a health professional trained in focussed weight-related assessment, supported by a Paediatrician). This design aspect allows the trial to run as a community-based service yet with a full clinical component to it. Removal of a hospital-based appointment with a specialist was designed to enable access to the service for larger numbers and minority groups,

and to avoid “medicalisation” of the process. Given the service is targeting Maori and those from lower socio-economic areas, ensuring accessibility and appropriateness are crucial to the study design, without compromising clinical care.

### Conception and consultation

The multi-disciplinary intervention model was developed after consideration of the national guidelines for implementation of weight management programmes, and the recommendations from the international systematic reviews and meta-analyses [7, 11, 12]. Longer-term follow-up was deemed imperative to determine whether lifestyle changes persisted over time, which has been a deficit of many previous studies. Conceptually, a multi-disciplinary intervention that incorporated dietary, physical and psychological support was considered important, with 12 months the optimal length of intervention. It was necessary for the intervention to be community-based with a strong focus on accessibility to Maori, and those from lower socio-economic areas.

Guidance was sought in the inception stages from the Maori Health Unit of Taranaki District Health Board, who advised appropriate linkages with the community,

1  
2  
3  
4  
5 identifying the key Maori stakeholders from Maori Health  
6 Centres in the region, and tribal representatives. Maori  
7 were instrumental in the initial set-up phase, applying a  
8 Maori lens to service delivery and curriculum development,  
9 and were on the interview panel for all staff members. It  
10 was imperative to the researchers that the consultation  
11 undertaken helped to:

- 12 1) Build appropriate and positive relationships around  
13 the region, particularly in South Taranaki, which has  
14 a proportionally larger population of Maori.
- 15 2) Ensure acceptability of the intended research by using  
16 a community-based approach.
- 17 3) Provide an opportunity for input and contribution  
18 from community stakeholders during the  
19 consultation process.  
20  
21

22 This process ensured that potential barriers for engage-  
23 ment for Maori and the most deprived in the community  
24 such as lack of access, unfamiliarity with research, distrust  
25 and problems with the research material were addressed  
26 [24]. The consultation process is ongoing.  
27

#### 28 Assessments

29 Assessments will be completed at six monthly intervals  
30 for 2 years from enrolment. Information will be gathered  
31 regarding ethnicity, past medical history, medical condi-  
32 tions and family history. Written informed consent will  
33 be obtained to take part in the trial and to share col-  
34 lected information between Sport Taranaki (the regional  
35 sports trust) and the Health Board. This will be from the  
36 participant if age-appropriate, or where the participants  
37 are children, a parent/guardian. Table 2 shows the key  
38 elements of the assessments undertaken.  
39

#### 40 Calculations

41 BMI, BMI percentile and BMI standard deviation score  
42 (SDS) will be calculated using UK Cole normative data  
43 [25] on the uploadable KIGS auxology software (Pfizer  
44 Endocrine Care TM). Height percentile will be calculated  
45 using gender specific growth charts for 2–18 years recom-  
46 mended by the Australasian Paediatric Endocrine Group  
47 for Australian and New Zealand use [26], based on Cen-  
48 ters for Disease Control stature for age and weight for age  
49 data [27]. To improve accuracy, BP SDS will be calculated  
50 using an age-based paediatric blood pressure reference  
51 chart calculator based on data from The Fourth Report  
52 [28, 29]. BP SDS will then be converted to percentiles.  
53 Peak flow percentile will be calculated based on reference  
54 New Zealand peak expiratory flow rates [30]. Waist hip ra-  
55 tio, and waist height ratio (WHtR) will be calculated.  
56 Participants will be deemed pubertal if they are female  
57 with breast development  $\geq$  B2 or male with pubic hair de-  
58 velopment  $\geq$  P3 on Tanner pubertal staging [31]. Level  
59  
60

of household deprivation will be calculated based on  
the New Zealand Deprivation Index 2006 [32].

#### Questionnaires

One aim of this trial is to determine whether there is an  
association between reported degree of “readiness” to  
make lifestyle changes at baseline assessment, and im-  
provements in lifestyle, including BMI SDS. Readiness  
for lifestyle change will be based on the transtheoretical  
model of stages of change [16], and will be established with  
two questionnaires (parent and child/adolescent) and the  
best judgement of the Healthy Lifestyles Coordinator at the  
end of the baseline assessments. Both questionnaires will  
be based on the 12-item Readiness to Change Question-  
naire [15] and will use a 5-point Likert scale to assess the  
parent’s and child/adolescent’s beliefs, attitudes and behav-  
iour about weight, eating behaviour and physical activity.  
Given the complexity of obesity, the questionnaires will be  
expanded. The child questionnaire will have 21-items and  
will be used for children 11 years and older, and a 27-item  
parent questionnaire, including 6 questions regarding  
family attitudes/behaviour, will be administered to parents.  
Whilst self-efficacy/confidence to make changes are not  
extensively measured, confidence in making changes in  
physical activity and eating behaviour has been included in  
both quantitative questionnaires.

Qualitative assessments of readiness for change will be  
made by the Healthy Lifestyles Coordinator at the end of  
the assessment. This will be the Coordinator’s overall  
subjective opinion as a health professional of stage of  
change in both the committed family member and child  
(if >11 years of age), based on the assessment. A qualita-  
tive stage of change will be included as this is what is  
undertaken in current clinical practice, and provides a  
comparator for the quantitative tool. The quantitative  
assessment will be scored at point of data entry by the  
Healthy Lifestyles Coordinator. Cronbach’s alpha will be  
used to establish the reliability of our readiness for change  
lifestyle questionnaire. Confirmatory factor analysis will be  
used to examine convergent and discriminant validity.  
The questionnaire was tested for understanding and com-  
prehension in a randomly selected cohort of clinic patients  
prior to trial commencement.

Questionnaires that will be administered to the child/  
adolescent or parent include the Paediatric Quality of Life  
Inventory (PedsQL)<sup>™</sup> – a measurement model designed to  
evaluate health-related quality of life in children and ado-  
lescents that has been extensively validated [33–38], the  
Achenbach Child Behavior Checklist (CBCL) (Child Behav-  
ior Checklist for Ages 1½-5: 7–28-00 Edition-601, Child  
Behavior Checklist for Ages 6–18: 6-1-01, Edition-201,  
Youth Self-report for Ages 11–18: 6-1-01 Edition-501)  
[39], children’s physical activity questionnaire (C-PAQ)  
[40], modified children’s dietary questionnaire for New

**Table 2** Assessment information for all participants

| Key assessments                                   | Baseline | 6 months | 12 months | 18 months | 24 months |
|---------------------------------------------------|----------|----------|-----------|-----------|-----------|
| Resting heart rate                                | ✓        | ✓        | ✓         | ✓         | ✓         |
| Blood pressure <sup>a</sup>                       | ✓        | ✓        | ✓         | ✓         | ✓         |
| Height <sup>b</sup>                               | ✓        | ✓        | ✓         | ✓         | ✓         |
| Weight <sup>c</sup>                               | ✓        | ✓        | ✓         | ✓         | ✓         |
| Waist circumference <sup>d</sup>                  | ✓        | ✓        | ✓         | ✓         | ✓         |
| Hip circumference <sup>e</sup>                    | ✓        | ✓        | ✓         | ✓         | ✓         |
| Peak flow <sup>f</sup>                            | ✓        | ✓        | ✓         | ✓         | ✓         |
| Acanthosis nigricans screen                       | ✓        | ✓        | ✓         | ✓         | ✓         |
| Ear, nose and throat examination <sup>g</sup>     | ✓        | ✓        | ✓         | ✓         | ✓         |
| Self report of Tanner pubertal stage <sup>h</sup> | ✓        | ✓        | ✓         | ✓         | ✓         |
| Accompanying adult's height and weight            | ✓        |          | ✓         |           | ✓         |
| Questionnaires <sup>i</sup>                       | ✓        | ✓        | ✓         | ✓         | ✓         |
| Blood sampling <sup>j</sup>                       | ✓        |          | ✓         |           | ✓         |

Technical/procedural information: <sup>a</sup>using Welch Allyn portable sphygmomanometer with flexiport reusable blood pressure cuffs of appropriate size, <sup>b</sup>to 0.1 cm using average of three readings on Seca 213 portable stadiometer, <sup>c</sup>to 0.1 kg using Seca 813 digital scales, <sup>d</sup>Seca 201 standard measuring tape (at mid-point between the lower margins of the rib and the top of the iliac crest to 0.1 cm at end of normal expiration) [52], <sup>e</sup>widest girth, <sup>f</sup>using Mini Wright peak flow meter, <sup>g</sup>using Welch Allyn portable auroscope, <sup>h</sup>or from parent in very young children [31], <sup>i</sup>apart from RFC questionnaire (only performed at baseline), <sup>j</sup>fasting insulin, fasting glucose, liver function tests, C-reactive protein, glycated Haemoglobin (HbA1c), and fasting lipids

Zealand use (CDQ) [41], 24 h food recall, knowledge of healthy lifestyles questionnaire (modified from the 2008 Nutrition Survey) [42], and our RFC questionnaire. Any participant deemed not ready for change will be reassessed every six months.

#### Assessment of physical fitness

Physical fitness assessments include the 550 m walk/run [43], and 5 days of ActiGraph wGT3X-BT (Actigraph, Pensacola, Florida, USA) accelerometer wear will be requested (3 weekdays and 2 weekend days), giving an estimated reliability of 0.80 in children and 0.70 in adolescents [44]. These levels of reliability have been questioned in more recent studies [45], however longer wear time is not practical due to resource. Epoch time will be set to 60 s and cut-off time 60 min.

#### Metabolic markers

Venous blood sampling will be undertaken to assess for metabolic status (Table 2). These biomarkers identify the biochemical comorbidities associated with obesity [46, 47]. Incentivisation for these samples will be provided.

#### Comorbidities

Weight-related comorbidities will be screened for and referrals will be made where appropriate.

#### Study arms

Every child entering Whanau Pakari will be discussed at the multi-disciplinary team meeting, allowing a full clinical review and referrals for further investigation where

appropriate, with additional discussion of dietary intake, physical activity, and psychology issues. The assessments and multi-disciplinary meetings will be repeated for each child/adolescent every six months, irrespective of which group they are randomised to.

#### Intervention

The intervention programme will be a 12-month multi-disciplinary programme with weekly group sessions. It will be administered by a physical activity coordinator, community dietitian, and psychologist: all staff members within the Whanau Pakari team. It will involve:

- 1) Home visits with the dietitian and physical activity coordinator in the initial phase
- 2) Weekly contact in activity sessions of either physical activity OR
- 3) Psychology sessions (covering topics such as bullying, self-esteem, parenting, making lifestyle changes), and dietitian sessions (covering topics such as portion size, virtual supermarket tours, healthy food on a budget, and vegetable gardens) (Table 3).

The participants will be engaged in the programme one hour per week for four school terms (equating to a total of 40 sessions). The same programme will be delivered to all participants, however these will be tailored to meet the cultural requirements of participants, for example, sessions that include traditional Maori games, recipe makeover of dishes from different cultures, and honouring of particular dietary requirements in cooking

**Table 3** Support provided to each group of trial participants enrolled in Whanau Pakari

|                                                                                                             | Control (Current "standard care") | Intervention |
|-------------------------------------------------------------------------------------------------------------|-----------------------------------|--------------|
| 6, 12, 18, 24 month assessments with nutrition advice and feedback (blood tests at baseline, 12, 24 months) | ✓                                 | ✓            |
| Home visit within 1 <sup>st</sup> month from physical activity coordinator and dietitian                    |                                   | ✓            |
| Physical activity coordinator/<br>Dietitian review of progress at 6 months (seen at group)                  |                                   | ✓            |
| Questionnaire review (team), multi-disciplinary team meeting – review and action of alerts                  | ✓                                 | ✓            |
| +/- Keyworker                                                                                               |                                   | ✓            |
| Weekly activity and education sessions for 12 months                                                        |                                   | ✓            |
| Total home visits over 2 years                                                                              | 5                                 | 6            |

sessions. A committed family member will be required to attend to support and learn alongside the child/teenager, as the programme is family-focussed. No incentivisation will be provided for attending sessions. A commitment contract will be signed at entry to the programme, outlining expectations of attendance at a minimum of 70 % of sessions to gain the most out of the programme. After 12 months, families will be linked into local sport centres/aquatic centres/gym facilities.

#### Non-intervention

The non-intervention (control) group will receive the same home-visit model and assessments as the intervention group, but will not undertake any of the intervention sessions (Table 3). The families will receive feedback from the assessments with dietary and physical activity guidelines. This model was chosen for community acceptability and is very similar to what is currently considered 'standard care'. This group are offered the intervention after 24 months. All participants declining intervention and those who have completed intervention and 12 month follow-up will be discharged back to primary care, with a guideline sheet of what to monitor, and assess with regard to weight-related comorbidities. Any participants withdrawing from the trial before the end of the 24 months will be incentivised to participate in a modified assessment to allow measurement of their progress, thus maximising completeness of data for the intention to treat analysis.

#### Randomisation

At baseline, there will be 2 assessments of RFC (given it is not known if a quantitative tool will be successful): the clinician's subjective measure (ranked pre-contemplation, contemplation, preparation/action), and a specifically

devised questionnaire using a 5-point Likert scale that is completed by the child (if > 11 years of age) and a second one for the parent. The RFC questionnaire was based on the original readiness to change questionnaire [15], focusing on beliefs and behaviour around three factors: weight, eating habits and activity levels. If the RFC ranking is scored in the contemplative or further along on either scale, then participants will be offered entry into the trial. We purposely set the bar low (i.e. below the preparation/action level) to assess whether degree of RFC predicts outcomes within those contemplative or above.

Patients will be assessed, consented, and entered into the trial prior to randomisation. Randomisation by minimisation (using age and ethnicity) will be conducted using the Minim randomisation computer programme which maintains approximate balance in the 2 arms for age and ethnicity but incorporates a random element so it cannot be predicted which study arm the subject will be allocated to.

#### Primary outcome

The primary outcome measure is the change in BMI SDS in the intervention group compared with the control group recorded at 6, 12, 18 and 24 months post enrolment.

#### Secondary outcomes

Secondary outcomes include changes in health-related quality of life; dietary knowledge and behaviour; physical activity (specifically moderate to very vigorous physical activity), sedentary behaviour, knowledge of benefits of physical activity, cardiovascular and metabolic profile (blood pressure, resting heart rate, waist circumference and WHtR) all at 6, 12, 18, and 24 months, and glycaemic control (fasting glucose and HbA1c), fasting insulin and lipids at baseline, 12 and 24 months.

#### Other aims and outcomes

This study also aims to investigate whether those assessed as ready for change (i.e. preparation/action) experience a greater reduction in BMI SDS compared with those less ready for change (i.e. contemplation). If the intervention is found to be effective, a cost-effectiveness analysis will be undertaken, taking into account multiple outcome parameters.

#### Data collection

The Healthy Lifestyles Coordinator will collect all data (apart from physical activity assessments) in the home assessments.

All data from assessments will be entered into a specific purpose-built database, which will be reviewed monthly for data validity and completeness. This database includes alerts for data outside acceptable medical



parameters, for example, elevated blood pressure percentiles, for discussion at multi-disciplinary meetings.

Progress will be captured on the multi-disciplinary team meeting database page, so the team can review the results of each 6-month assessment for each participant, and make further recommendations or referrals.

### Statistical considerations

#### Sample size

With 107 participants per group (120 to account for a 10 % dropout rate) there is 80 % power to detect a difference in change in BMI of 0.5 SDS at the 5 % level of significance, with a standard deviation of 1.3 [48]. Of note, only 15/54 lifestyle studies included in a systematic review at the time of study design reported power calculations [11]. Subsequent meta-analysis of interventions has shown that even a change of  $-0.1$  BMI SDS can lead to improvements in cardiovascular and metabolic outcomes [12]. It is hoped that even demonstrating smaller differences as this more recent literature has shown will still be important at a population level.

#### Data analyses

Statistical analyses will be performed using SAS version 9.3 (SAS Institute Inc. Cary NC). A general linear mixed model will be used to assess change from baseline measured at 6, 12, 18 and 24 months after initiating the intervention adjusting for age, gender, socioeconomic status, and ethnicity and degree of readiness for change. Means and standard deviations of changes from baseline in outcomes of interest, for both the raw and modelled data, will be presented.

#### Baseline characteristics

Baseline characteristics will be summarised using descriptive statistics. Continuous variables will be described as numbers of observed and missing values, mean, standard deviation, median, minimum and maximum. Categorical variables will be described as frequencies and percentages.

#### Treatment effects

Analyses will be performed on the intended to treat population. Reporting will adhere to the CONSORT guidelines for reporting parallel group randomised trials [13].

### Discussion

Whanau Pakari is expected to provide important new knowledge to the area of child obesity. This will be achieved with its focus on an indigenous group at increased risk for obesity and its resulting comorbidities, and through its engagement with the community to increase acceptability of the programme. It is likely to inform these areas in a robust manner if high participation is achieved and maintained.

This randomised controlled trial is unique in three key ways. First, it is assessing a mainstream multi-disciplinary clinical service that has evolved to specifically ensure accessibility and appropriateness for Indigenous people. Whanau Pakari is a community “real life” intervention programme resulting out of a clinical need, and has the potential to answer critical questions in relation to delivery of interventions in this area. Secondly, Whanau Pakari utilises a home-visit model which replaces hospital medical assessments, therefore “de-medicalising” obesity assessments. The family-based home model is likely to appeal to many ethnic groups who resist the hospital-based mainstream clinical models currently operating in most areas. Thirdly, Whanau Pakari will only include those considered potentially ready for change, and will investigate whether the level of “readiness” to make lifestyle changes predicts improved outcomes in intervention programmes. If the RFC measures provide a reliable and valid measure of outcome success, then the development of paired interventions around motivation for change for those in earlier stages of change followed by direct interventions for those in later stages could result in less programme dropout as well as being a more efficient and cost effective utilisation of limited resource.

A limitation of this study is the use of self-report for Tanner pubertal stage. Previous literature has demonstrated that obese girls tend to overestimate breast size and obese males stage of pubic hair development more than their non-obese counterparts [49]. However, we did not believe it was appropriate to undertake pubertal examination within the home setting, and it was determined this would be a more appropriate cut-off for pre-pubertal and pubertal status than an arbitrary age for males and females.

Weight-related comorbidities are a particular concern in child obesity, given the long-lasting effects of these conditions [50]. Past meta-analysis highlighted that a BMI SDS reduction of  $-0.1$  led to significant improvements in multiple cardiovascular and metabolic outcomes over time [12]. BMI, in conjunction with waist circumference, WHtR, fasting lipids, glucose and insulin, and blood pressure (all being measured at intervals over an extended period of follow-up) will provide a comprehensive assessment of cardiovascular and metabolic outcomes long-term.

Whilst there has been a shifting focus toward early obesity intervention targeting critical periods of human development, there is still a need for an effective intervention programme to provide assistance for those children and adolescents who are already obese. This research aligns with the Ministry of Health’s clinical guidelines for weight management in children and young people [7], and addresses barriers to accessing services and programmes identified by the Office of the Auditor General’s performance audit into child obesity [51].

In summary, this trial will determine if this unique multi-disciplinary intervention will result in improved health outcomes, especially among Maori. It will also investigate whether there is an indication that being at the preparation/action stages of RFC compared to those in the contemplative stage results in improved success in intervention programmes. As translational research, it will inform the New Zealand Ministry of Health regarding ways to combat child and adolescent obesity. It is hoped this study will lead to prevention of the adult associated comorbidities of child obesity into later life for some individuals, thereby reducing morbidity, particularly for those most vulnerable in our population.

#### Abbreviations

ANZCTR: Australian New Zealand Clinical Trials Registry; OECD: Organisation for Economic Cooperation and Development; CONSORT: Consolidated Standards of Reporting Trials; RFC: Readiness for change; BMI: Body mass index; HbA1c: glycated Haemoglobin; SDS: standard deviation score; WHtR: Waist height ratio; Peds QL: Pediatric Quality of Life; CBCL: Child Behaviour Checklist; C-PAQ: Children's Physical Activity Questionnaire; CDQ: Children's Dietary Questionnaire.

#### Competing interests

Dr Anderson wishes to declare funding from grants as listed in funding section below.

#### Authors' contributions

YCA designed the study, will coordinate the trial, provide Paediatrician oversight, and drafted the manuscript. LEW will recruit the participants, undertake the assessments and enter the data. GMSD created the readiness for change quantitative assessment tool. KRM will undertake the fitness assessments. TLC is a research assistant and will assist with data entry. CCG is secondary supervisor for the research team. JMS was involved in study design, and will be involved with data analysis. WSC contributed to study design. PLH contributed to study design, and supervises the research team. YCA, CCG, WSC and PLH have been involved in revising the draft critically for important intellectual content. All authors have given final approval of the version to be published.

#### Authors' information

Not applicable.

#### Acknowledgements

This trial is funded by grants from the Health Research Council of New Zealand, Taranaki Medical Foundation, Royal Australasian College of Physicians, Maurice and Phyllis Paykel Trust, and Lotteries Health Research. We would like to acknowledge Dr Katharine Treves and Michelle Butler, who will assist with data collection and entering; Diana O'Neill and Dr Pat Tuohy (Ministry of Health) for their support of the trial; and the Taranaki District Health Board and Sport Taranaki for funding the service. Quality of Life in this paper will be assessed using the PedsQL™, developed by Dr. James W. Varni.

#### Funding

Health Research Council of New Zealand, Taranaki Medical Foundation, Royal Australasian College of Physicians, Maurice and Phyllis Paykel Trust, and Lotteries Health Research.

#### Author details

<sup>1</sup>Taranaki District Health Board, New Plymouth, New Zealand. <sup>2</sup>The Liggins Institute, The University of Auckland, Auckland, New Zealand. <sup>3</sup>Sport Taranaki, New Plymouth, New Zealand. <sup>4</sup>Department of Paediatrics, The University of Auckland, Auckland, New Zealand. <sup>5</sup>Centre for Longitudinal Research – He Ara ki Mua, The University of Auckland, Auckland, New Zealand. <sup>6</sup>Starship Children's Hospital, Auckland District Health Board, Auckland, New Zealand. <sup>7</sup>Department of Epidemiology and Biostatistics, The University of Auckland, Auckland, New Zealand.

Received: 18 November 2014 Accepted: 21 September 2015

Published online: 08 October 2015

#### References

- Lobstein T, Baur L, Uauy R, IASO International Obesity TaskForce. Obesity in children and young people: a crisis in public health. *Obes Rev*. 2004;5 Suppl 1:4–85.
- Han JC, Lawlor DA, Kimm SY. Childhood obesity. *Lancet*. 2010;375(9727):1737–48.
- Baur LA, Hazelton B, Shrewsbury VA. Assessment and management of obesity in childhood and adolescence. *Nat Rev Gastroenterol Hepatol*. 2011;8(11):635–45.
- OECD. "Overweight and obesity", in OECD Factbook 2013: Economic, Environmental and Social Statistics. <http://dx.doi.org/10.1787/factbook-2013-100-en>.
- Ministry of Health. Annual update of key results 2013/2014: New Zealand health survey. Wellington: Ministry of Health, New Zealand; 2014.
- Anderson YC, Taylor GM, Grant CC, Fulton RB, Hofman PL. The Green Prescription Active Families programme in Taranaki, New Zealand 2007–2009: did it reach children in need? *J Prim Health Care*. 2015;7(3):192–7.
- Ministry of Health and Clinical Trials Research Unit, New Zealand. Clinical guidelines for weight management in New Zealand children and young people. 2009. <http://www.health.govt.nz/publication/clinical-guidelines-weight-management-new-zealand-children-and-young-people>.
- Anderson YC, Cave TL, Cunningham VJ, Pereira NM, Woolerton DM, Grant CC, et al. Effectiveness of current interventions in obese New Zealand children and adolescents. *NZMJ*. 2015;128(1417):8.
- Cretikos MA, Valenti L, Britt HC, Baur LA. General practice management of overweight and obesity in children and adolescents in Australia. *Med Care*. 2008;46(11):1163–9.
- Wake M, Campbell MW, Turner M, Price A, Sabin MA, Davis E, et al. How training affects Australian paediatricians' management of obesity. *Arch Dis Child*. 2013;98(1):3–8.
- Oude Luttikhuis H, Baur L, Jansen H, Shrewsbury VA, O'Malley C, Stolk R, et al. Interventions for treating obesity in children. *Cochrane Database Syst Rev*. 2009; Issue 1. Art. No.: CD001872. doi:10.1002/14651858.CD001872.pub2.
- Ho M, Garnett SP, Baur L, Burrows T, Stewart L, Neve M, et al. Effectiveness of lifestyle interventions in child obesity: systematic review with meta-analysis. *Pediatrics*. 2012;130(6):e1647–71.
- Moher D, Hopewell S, Schulz KF, Montori V, Gotsche PC, Devereaux PJ, et al. CONSORT 2010 explanation and elaboration: updated guidelines for reporting parallel group randomised trials. *BMJ*. 2010;340:869.
- Prochaska JO, DiClemente CC. Transtheoretical therapy: toward a more integrative model of change. *Psychother Theor Res Prac*. 1982;19(3):276–88.
- Rollnick S, Heather N, Gold R, Hall W. Development of a short "readiness to change" questionnaire for use in brief, opportunistic interventions among excessive drinkers. *Br J Addict*. 1992;87(5):743–54.
- DiClemente CC, Prochaska JO. Self-change and therapy change of smoking behavior: a comparison of processes of change in cessation and maintenance. *Addict Behav*. 1982;7(2):133–42.
- Hoke M, Timmerman G. Transtheoretical model: potential usefulness with overweight rural Mexican American women. *Hisp Health Care Int*. 2011;9(1):41–9.
- Rhee KE, De Lago CW, Arscott-Mills T, Mehta SD. Factors associated with parental readiness to make changes for overweight children. *Pediatrics*. 2005;116(1):e94–101.
- Statistics New Zealand. Census 2013: ethnic group by age group and sex. <http://nzdotstat.stats.govt.nz/wbos/Index.aspx?DataSetCode=TABLECODE8021#>.
- Cole TJ. A chart to link child centiles of body mass index, weight and height. *Eur J Clin Nutr*. 2002;56(12):1194–9.
- Ministry of Health, New Zealand. Child health: fact sheet 6, plotting and assessing infants and toddlers up to age five years. <http://www.health.govt.nz/system/files/documents/pages/factsheet-6-growth-charts-well-child.pdf>.
- Ministry of Health, New Zealand. He Korowai Oranga: Maori health strategy 2014. <http://www.health.govt.nz/publication/guide-he-korowai-oranga-maori-health-strategy>.
- Ministry of Health, New Zealand. The Whanau Ora tool. <http://www.publichealthworkforce.org.nz/data/media/documents/Maori%20PHWD/Final%20Whanau%20Ora%20A4-4.pdf>.

- 1  
2  
3  
4  
5  
6  
7  
8  
9  
10  
11  
12  
13  
14  
15  
16  
17  
18  
19  
20  
21  
22  
23  
24  
25  
26  
27  
28  
29  
30  
31  
32  
33  
34  
35  
36  
37  
38  
39  
40  
41  
42  
43  
44  
45  
46  
47  
48  
49  
50  
51  
52  
53  
54  
55  
56  
57  
58  
59  
60
24. Glover M, Kira A, Johnston V, Walker N, Thomas D, Chang A, et al. A systematic review of barriers and facilitators to participation in randomized controlled trials by Indigenous people from New Zealand, Australia, Canada and the United States. *Glob Health Promot*. 2015;22(1):21–31.
  25. Freeman JV, Cole TJ, Chinn S, Jones PR, White EM, Preece MA. Cross sectional stature and weight reference curves for the UK, 1990. *Arch Dis Child*. 1995;73(1):17–24.
  26. Australasian Paediatric Endocrine Group. Australian and New Zealand growth charts. <http://www.apeg.org.au/ClinicalResourcesLinks/GrowthCharts/tabid/101/Default.aspx>.
  27. National Center for Health Statistics. Clinical growth charts: Centers for Disease Control and Prevention. [www.cdc.gov/nchs/about/major/nhanes/growthcharts/datafiles.htm](http://www.cdc.gov/nchs/about/major/nhanes/growthcharts/datafiles.htm).
  28. National High Blood Pressure Education Program Working Group on High Blood Pressure in Children and Adolescents. The fourth report on the diagnosis, evaluation, and treatment of high blood pressure in children and adolescents. *Pediatrics*. 2004;114(2 Suppl 4th Report):555–76.
  29. Shypailo RJ, Ellis KJ. Age-based pediatric blood pressure reference charts. <https://www.bcm.edu/bodycomplab/Flashapps/BPVAgeChartpage.html>.
  30. St George IM, Reid JJ, Grimmond BB, Morton R. PEFR in Dunedin children aged 5–15 years. *N Z Med J*. 1982;95(714):597.
  31. Tanner J. Growth at adolescence; with a general consideration of the effects of hereditary and environmental factors upon growth and maturation from birth to maturity. Oxford: Blackwell Scientific Publications; 1962.
  32. University of Otago - School of Medicine and Health Science, New Zealand. NZ Deprivation Index 2006. <https://koordinates.com/layer/1066-nz-deprivation-index-2006/>.
  33. Varni JW, Seid M, Rode CA. The PedsQL: measurement model for the pediatric quality of life inventory. *Med Care*. 1999;37(2):126–39.
  34. Varni JW, Seid M, Kurtin PS. PedsQL 4.0: reliability and validity of the Pediatric Quality of Life Inventory version 4.0 generic core scales in healthy and patient populations. *Med Care*. 2001;39(8):800–12.
  35. Varni JW, Burwinkle TM, Seid M, Skarr D. The PedsQL 4.0 as a pediatric population health measure: feasibility, reliability, and validity. *Ambul Pediatr*. 2003;3(6):329–41.
  36. Varni JW, Seid M, Knight TS, Uzark K, Szer IS. The PedsQL™ 4.0 generic core scales: sensitivity, responsiveness, and impact on clinical decision-making. *J Behav Med*. 2002;25(2):175–93.
  37. Chan KS, Mangione-Smith R, Burwinkle TM, Rosen M, Varni JW. The PedsQL: reliability and validity of the short-form generic core scales and asthma module. *Med Care*. 2005;43(3):256–65.
  38. Varni JW, Limbers CA. The PedsQL™ 4.0 generic core scales young adult version: feasibility, reliability and validity in a university student population. *J Health Psychol*. 2009;14(4):611–22.
  39. Achenbach TM, Ruffle TM. The Child Behavior Checklist and related forms for assessing behavioral/emotional problems and competencies. *Pediatr Rev*. 2000;21(8):265–71.
  40. Corder K, van Sluijs EM, Wright A, Whincup P, Wareham NJ, Ekelund U. Is it possible to assess free-living physical activity and energy expenditure in young people by self-report? *Am J Clin Nutr*. 2009;89(3):862–70.
  41. Magarey A, Golley R, Spurrier N, Goodwin E, Ong F. Reliability and validity of the Children's Dietary Questionnaire: a new tool to measure children's dietary patterns. *Int J Pediatr Obes*. 2009;4(4):257–65.
  42. Clinical Trials Research Unit and Synovate. A national survey of children and young people's physical activity and dietary behaviours in New Zealand: 2008/09 - key findings. <http://www.health.govt.nz/publication/national-survey-children-and-young-peoples-physical-activity-and-dietary-behaviours-new-zealand-2008>.
  43. Hamlin MJ, Fraser M, Lizamore CA, Draper N, Shearman JP, Kimber NE. Measurement of cardiorespiratory fitness in children from two commonly used field tests after accounting for body fatness and maturity. *J Hum Kinet*. 2014;40(1):83–92.
  44. Trost SG, Pate RR, Freedson PS, Sallis JF, Taylor WC. Using objective physical activity measures with youth: How many days of monitoring are needed? *Med Sci Sports Exerc*. 2000;32(2):426–31.
  45. Ojiambo R, Cuthill R, Budd H, Konstabel K, Casajús JA, González-Agüero A, et al. Impact of methodological decisions on accelerometer outcome variables in young children. *Int J Obes*. 2011;35:98–103.
  46. Lakshman R, Elks CE, Ong KK. Childhood obesity. *Circulation*. 2012;126(14):1770–9.
  47. Barness LA, Opitz JM, Gilbert-Barness E. Obesity: genetic, molecular, and environmental aspects. *Am J Med Genet A*. 2007;143A(24):3016–34.
  48. Webber L, Hill C, Saxton J, Van Jaarsveld CH, Wardle J. Eating behaviour and weight in children. *Int J Obes (Lond)*. 2009;33(1):21–8.
  49. Bonat S, Pathomvanich A, Keil MF, Field AE, Yanovski JA. Self-assessment of pubertal stage in overweight children. *Pediatrics*. 2002;110(4):743–7.
  50. World Health Organization. Interim Report of the Commission on Ending Childhood Obesity. 2015.
  51. Controller and Auditor General. Evolving approach to combating child obesity. Wellington: Office of the Auditor-General; 2013.
  52. World Health Organisation. Waist circumference and waist-hip ratio: report of a WHO expert consultation. [http://www.who.int/nutrition/publications/obesity/WHO\\_report\\_waistcircumference\\_and\\_waisthip\\_ratio/en/](http://www.who.int/nutrition/publications/obesity/WHO_report_waistcircumference_and_waisthip_ratio/en/).

**Submit your next manuscript to BioMed Central and take full advantage of:**

- Convenient online submission
- Thorough peer review
- No space constraints or color figure charges
- Immediate publication on acceptance
- Inclusion in PubMed, CAS, Scopus and Google Scholar
- Research which is freely available for redistribution

Submit your manuscript at  
[www.biomedcentral.com/submit](http://www.biomedcentral.com/submit)

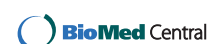

## STROBE Statement—checklist of items that should be included in reports of observational studies

|                           | Item No                                                                                                                                                                                                                                                                                                   | Recommendation                                                                                                                                                                                                                                                                                                                                                                                                                                                         | Complete?                                                                              |
|---------------------------|-----------------------------------------------------------------------------------------------------------------------------------------------------------------------------------------------------------------------------------------------------------------------------------------------------------|------------------------------------------------------------------------------------------------------------------------------------------------------------------------------------------------------------------------------------------------------------------------------------------------------------------------------------------------------------------------------------------------------------------------------------------------------------------------|----------------------------------------------------------------------------------------|
| <b>Title and abstract</b> | 1                                                                                                                                                                                                                                                                                                         | (a) Indicate the study's design with a commonly used term in the title or the abstract                                                                                                                                                                                                                                                                                                                                                                                 | ✓(1-2) 'enrolment' indicates baseline measures                                         |
|                           |                                                                                                                                                                                                                                                                                                           | (b) Provide in the abstract an informative and balanced summary of what was done and what was found                                                                                                                                                                                                                                                                                                                                                                    | ✓(2-3)                                                                                 |
| <b>Introduction</b>       |                                                                                                                                                                                                                                                                                                           |                                                                                                                                                                                                                                                                                                                                                                                                                                                                        |                                                                                        |
| Background/rationale      | 2                                                                                                                                                                                                                                                                                                         | Explain the scientific background and rationale for the investigation being reported                                                                                                                                                                                                                                                                                                                                                                                   | ✓(4-7)                                                                                 |
| Objectives                | 3                                                                                                                                                                                                                                                                                                         | State specific objectives, including any prespecified hypotheses                                                                                                                                                                                                                                                                                                                                                                                                       | ✓(6-7)                                                                                 |
| <b>Methods</b>            |                                                                                                                                                                                                                                                                                                           |                                                                                                                                                                                                                                                                                                                                                                                                                                                                        |                                                                                        |
| Study design              | 4                                                                                                                                                                                                                                                                                                         | Present key elements of study design early in the paper                                                                                                                                                                                                                                                                                                                                                                                                                | ✓(7)                                                                                   |
| Setting                   | 5                                                                                                                                                                                                                                                                                                         | Describe the setting, locations, and relevant dates, including periods of recruitment, exposure, follow-up, and data collection                                                                                                                                                                                                                                                                                                                                        | ✓(7)                                                                                   |
| Participants              | 6                                                                                                                                                                                                                                                                                                         | (a) <i>Cohort study</i> —Give the eligibility criteria, and the sources and methods of selection of participants. Describe methods of follow-up<br><i>Case-control study</i> —Give the eligibility criteria, and the sources and methods of case ascertainment and control selection. Give the rationale for the choice of cases and controls<br><i>Cross-sectional study</i> —Give the eligibility criteria, and the sources and methods of selection of participants | ✓(7)                                                                                   |
|                           |                                                                                                                                                                                                                                                                                                           | (b) <i>Cohort study</i> —For matched studies, give matching criteria and number of exposed and unexposed<br><i>Case-control study</i> —For matched studies, give matching criteria and the number of controls per case                                                                                                                                                                                                                                                 | N/A descriptive baseline results of an RCT                                             |
| Variables                 | 7                                                                                                                                                                                                                                                                                                         | Clearly define all outcomes, exposures, predictors, potential confounders, and effect modifiers. Give diagnostic criteria, if applicable                                                                                                                                                                                                                                                                                                                               | ✓(7-11)                                                                                |
| Data sources/measurement  | 8*                                                                                                                                                                                                                                                                                                        | For each variable of interest, give sources of data and details of methods of assessment (measurement). Describe comparability of assessment methods if there is more than one group                                                                                                                                                                                                                                                                                   | ✓(7-10)                                                                                |
| Bias                      | 9                                                                                                                                                                                                                                                                                                         | Describe any efforts to address potential sources of bias                                                                                                                                                                                                                                                                                                                                                                                                              | ✓(10-11)                                                                               |
| Study size                | 10                                                                                                                                                                                                                                                                                                        | Explain how the study size was arrived at                                                                                                                                                                                                                                                                                                                                                                                                                              | Information provided in the published protocol (Anderson et al. BMC Obesity 2015;2:41) |
| Quantitative variables    | 11                                                                                                                                                                                                                                                                                                        | Explain how quantitative variables were handled in the analyses. If applicable, describe which groupings were chosen and why                                                                                                                                                                                                                                                                                                                                           | ✓(10-11)                                                                               |
| Statistical methods       | 12                                                                                                                                                                                                                                                                                                        | (a) Describe all statistical methods, including those used to control for confounding                                                                                                                                                                                                                                                                                                                                                                                  | ✓(10-11)                                                                               |
|                           |                                                                                                                                                                                                                                                                                                           | (b) Describe any methods used to examine subgroups and interactions                                                                                                                                                                                                                                                                                                                                                                                                    | ✓(10-11)                                                                               |
|                           | (c) Explain how missing data were addressed                                                                                                                                                                                                                                                               | N/A                                                                                                                                                                                                                                                                                                                                                                                                                                                                    |                                                                                        |
|                           | (d) <i>Cohort study</i> —If applicable, explain how loss to follow-up was addressed<br><i>Case-control study</i> —If applicable, explain how matching of cases and controls was addressed<br><i>Cross-sectional study</i> —If applicable, describe analytical methods taking account of sampling strategy | N/A descriptive baseline results of an RCT                                                                                                                                                                                                                                                                                                                                                                                                                             |                                                                                        |
|                           | (e) Describe any sensitivity analyses                                                                                                                                                                                                                                                                     | N/A                                                                                                                                                                                                                                                                                                                                                                                                                                                                    |                                                                                        |



| <b>Results</b>           |     |                                                                                                                                                                                                              |           |
|--------------------------|-----|--------------------------------------------------------------------------------------------------------------------------------------------------------------------------------------------------------------|-----------|
| Participants             | 13* | (a) Report numbers of individuals at each stage of study—eg numbers potentially eligible, examined for eligibility, confirmed eligible, included in the study, completing follow-up, and analysed            | ✓ (12)    |
|                          |     | (b) Give reasons for non-participation at each stage                                                                                                                                                         | N/A       |
|                          |     | (c) Consider use of a flow diagram                                                                                                                                                                           | N/A       |
| Descriptive data         | 14* | (a) Give characteristics of study participants (eg demographic, clinical, social) and information on exposures and potential confounders                                                                     | ✓ (12)    |
|                          |     | (b) Indicate number of participants with missing data for each variable of interest                                                                                                                          | ✓ (15)    |
|                          |     | (c) <i>Cohort study</i> —Summarise follow-up time (eg, average and total amount)                                                                                                                             | N/A       |
| Outcome data             | 15* | <i>Cohort study</i> —Report numbers of outcome events or summary measures over time                                                                                                                          | N/A       |
|                          |     | <i>Case-control study</i> —Report numbers in each exposure category, or summary measures of exposure                                                                                                         | N/A       |
|                          |     | <i>Cross-sectional study</i> —Report numbers of outcome events or summary measures                                                                                                                           | N/A       |
| Main results             | 16  | (a) Give unadjusted estimates and, if applicable, confounder-adjusted estimates and their precision (eg, 95% confidence interval). Make clear which confounders were adjusted for and why they were included | ✓ (12–16) |
|                          |     | (b) Report category boundaries when continuous variables were categorized                                                                                                                                    | ✓ (12–16) |
|                          |     | (c) If relevant, consider translating estimates of relative risk into absolute risk for a meaningful time period                                                                                             | N/A       |
| Other analyses           | 17  | Report other analyses done—eg analyses of subgroups and interactions, and sensitivity analyses                                                                                                               | ✓ (12–16) |
| <b>Discussion</b>        |     |                                                                                                                                                                                                              |           |
| Key results              | 18  | Summarise key results with reference to study objectives                                                                                                                                                     | ✓ (17–18) |
| Limitations              | 19  | Discuss limitations of the study, taking into account sources of potential bias or imprecision. Discuss both direction and magnitude of any potential bias                                                   | ✓ (20–21) |
| Interpretation           | 20  | Give a cautious overall interpretation of results considering objectives, limitations, multiplicity of analyses, results from similar studies, and other relevant evidence                                   | ✓ (21)    |
| Generalisability         | 21  | Discuss the generalisability (external validity) of the study results                                                                                                                                        | ✓ (20–21) |
| <b>Other information</b> |     |                                                                                                                                                                                                              |           |
| Funding                  | 22  | Give the source of funding and the role of the funders for the present study and, if applicable, for the original study on which the present article is based                                                | ✓ (22)    |

\*Give information separately for cases and controls in case-control studies and, if applicable, for exposed and unexposed groups in cohort and cross-sectional studies.

**Note:** An Explanation and Elaboration article discusses each checklist item and gives methodological background and published examples of transparent reporting. The STROBE checklist is best used in conjunction with this article (freely available on the Web sites of PLoS Medicine at <http://www.plosmedicine.org/>, Annals of Internal Medicine at <http://www.annals.org/>, and Epidemiology at <http://www.epidem.com/>). Information on the STROBE Initiative is available at [www.strobe-statement.org](http://www.strobe-statement.org).

# BMJ Open

## Assessment of health-related quality of life and psychological well-being of children and adolescents with obesity enrolled in a New Zealand community-based intervention programme: an observational study

|                                 |                                                                                                                                                                                                                                                                                                                                                                                                                                                                                                                                                                                                                                                                                                                                                                                                                                                       |
|---------------------------------|-------------------------------------------------------------------------------------------------------------------------------------------------------------------------------------------------------------------------------------------------------------------------------------------------------------------------------------------------------------------------------------------------------------------------------------------------------------------------------------------------------------------------------------------------------------------------------------------------------------------------------------------------------------------------------------------------------------------------------------------------------------------------------------------------------------------------------------------------------|
| Journal:                        | <i>BMJ Open</i>                                                                                                                                                                                                                                                                                                                                                                                                                                                                                                                                                                                                                                                                                                                                                                                                                                       |
| Manuscript ID                   | bmjopen-2016-015776.R2                                                                                                                                                                                                                                                                                                                                                                                                                                                                                                                                                                                                                                                                                                                                                                                                                                |
| Article Type:                   | Research                                                                                                                                                                                                                                                                                                                                                                                                                                                                                                                                                                                                                                                                                                                                                                                                                                              |
| Date Submitted by the Author:   | 06-May-2017                                                                                                                                                                                                                                                                                                                                                                                                                                                                                                                                                                                                                                                                                                                                                                                                                                           |
| Complete List of Authors:       | Anderson, Yvonne; Taranaki District Health Board, Paediatrics; University of Auckland, Liggins Institute<br>Wynter, Lisa; Taranaki District Health Board, Paediatrics<br>Treves, Katharine; Taranaki District Health Board, Paediatrics<br>Grant, Cameron; University of Auckland, Paediatrics; Starship Children's Hospital, Auckland District Health Board<br>Stewart, Joanna; University of Auckland, Biostatistics<br>Cave, Tami; University of Auckland, Liggins Institute<br>Woules, Trecia; University of Auckland Faculty of Medical and Health Sciences, Psychological Medicine<br>Derraik, José; University of Auckland, Liggins Institute<br>Cutfield, Wayne; University of Auckland, Liggins Institute and NRCGD<br>Hofman, Paul; University of Auckland, Liggins Institute; Starship Children's Hospital, Auckland District Health Board |
| <b>Primary Subject Heading</b>: | Paediatrics                                                                                                                                                                                                                                                                                                                                                                                                                                                                                                                                                                                                                                                                                                                                                                                                                                           |
| Secondary Subject Heading:      | Nutrition and metabolism, Mental health                                                                                                                                                                                                                                                                                                                                                                                                                                                                                                                                                                                                                                                                                                                                                                                                               |
| Keywords:                       | PAEDIATRICS, obesity, adolescent, quality of life, lifestyle intervention, Whānau Pakari                                                                                                                                                                                                                                                                                                                                                                                                                                                                                                                                                                                                                                                                                                                                                              |
|                                 |                                                                                                                                                                                                                                                                                                                                                                                                                                                                                                                                                                                                                                                                                                                                                                                                                                                       |

SCHOLARONE™  
Manuscripts

1  
2  
3 1 **Assessment of health-related quality of life and psychological well-being of children and**  
4  
5  
6 2 **adolescents with obesity enrolled in a New Zealand community-based intervention**  
7  
8 3 **programme: an observational study**  
9  
10 4

11  
12  
13 5 Yvonne C Anderson,<sup>1,2</sup> Lisa E Wynter,<sup>1</sup> Katharine F Treves,<sup>1</sup> Cameron C Grant,<sup>3,4,5</sup> Joanna M  
14  
15 6 Stewart,<sup>6</sup> Tami L Cave,<sup>2</sup> Trecia A Wouldes,<sup>7</sup> José G B Derraik,<sup>2,8,9</sup> Wayne S Cutfield,<sup>2,4,8</sup> Paul L  
16  
17 7 Hofman.<sup>2,4</sup>  
18  
19

20 8  
21  
22 9 **Author Institutions/affiliations**  
23

24 10 <sup>1</sup> Department of Paediatrics, Taranaki District Health Board, New Plymouth, New Zealand.  
25

26 11 <sup>2</sup> Liggins Institute, University of Auckland, Auckland, New Zealand.  
27

28 12 <sup>3</sup> Department of Paediatrics, Child and Youth Health, University of Auckland, Auckland, New Zealand.  
29

30 13 <sup>4</sup> Starship Children's Hospital, Auckland District Health Board, Auckland, New Zealand.  
31

32 14 <sup>5</sup> Centre for Longitudinal Research - He Ara ki Mua, University of Auckland, Auckland, New Zealand.  
33

34 15 <sup>6</sup> Department of Epidemiology and Biostatistics, University of Auckland, Auckland, New Zealand.  
35

36 16 <sup>7</sup> Faculty of Medical and Health Sciences, University of Auckland, Auckland, New Zealand.  
37

38 17 <sup>8</sup> A Better Start – National Science Challenge, University of Auckland, Auckland, New Zealand.  
39

40 18 <sup>9</sup> Department of Women's and Children's Health, Uppsala University, Uppsala, Sweden.  
41  
42  
43  
44  
45

46 20 **Correspondence**  
47

48 21 Yvonne Anderson,  
49

50 22 Department of Paediatrics,  
51

52 23 Taranaki Base Hospital,  
53

54 24 David Street,  
55  
56  
57  
58  
59  
60

1  
2  
3 25 New Plymouth 4310

4  
5  
6 26 [yvonne.anderson@tdhb.org.nz](mailto:yvonne.anderson@tdhb.org.nz), +6467536139

7  
8 27 **Keywords:** Paediatric, obesity, adolescent, quality of life, lifestyle intervention, Whānau Pakari

9  
10 28 **Word count:** 4107

11  
12  
13 29  
14  
15 30 **ABSTRACT**

16  
17 31 **Objective:** To describe health-related quality of life (HRQOL) and psychological well-being of  
18 32 children and adolescents at enrolment in a multi-disciplinary community-based obesity  
19 33 programme, and to determine association with ethnicity. This programme targeted indigenous  
20 34 people and those from most deprived households. Further, this cohort was compared to other  
21 35 populations/normative data.

22 36 **Methods:** This study examines baseline demographic data of an unblinded randomised  
23 37 controlled clinical trial. Participants (recruited from January 2012-August 2014) resided in  
24 38 Taranaki, New Zealand (NZ), and for this study we only included those with a body mass index  
25 39 (BMI)  $\geq 98^{\text{th}}$  percentile (obese). HRQOL and psychological well-being were assessed using the  
26 40 PedsQL 4.0<sup>TM</sup> (parent and child reports), and the Achenbach's Child Behaviour Checklist  
27 41 (CBCL)/Youth Self Report (YSR). The trial was registered with the Australian NZ Clinical  
28 42 Trials Registry (ANZCTR: 12611000862943).

29 43 **Results:** Assessments were undertaken for 233 participants (45% Māori, 45% NZ European,  
30 44 10% other ethnicities, 52% female, 30% from the most deprived household quintile), mean age  
31 45 10.6 years. The mean BMI standard deviation score (SDS) was 3.12 (range 2.01-5.34). Total  
32 46 PedsQL generic scaled score (parent) was lower (mean=63.4, SD=14.0) than an age-matched  
33 47 group of Australian children without obesity from the Health of Young Victorians study

1  
2  
3 48 (mean=83.1, SD=12.5). In multivariable models, child and parental generic scaled scores  
4  
5 49 decreased in older children ( $\beta=-0.70$  and  $p=0.031$ ,  $\beta=-0.64$  and  $p=0.047$ , respectively).  
6  
7  
8 50 Behavioural difficulties (CBCL/YSR total score) were reported in 43.5% of participants, with the  
9  
10 51 rate of emotional/behavioural difficulties 6 times higher than reported norms ( $p<0.001$ ).  
11

12 **Conclusions:** In this cohort, children and adolescents with obesity had a low HRQOL, and a  
13  
14 concerning level of psychological difficulties, irrespective of ethnicity. Obesity itself rather than  
15 53  
16  
17 54 ethnicity or deprivation appeared to contribute to lower HRQOL scores. This study highlights the  
18  
19 55 importance of psychologist involvement in obesity intervention programmes.  
20  
21

22 56

23  
24  
25 **Strengths:**

- 26  
27 58 • This study is the first to report HRQOL in children and adolescents with obesity in New  
28  
29 59 Zealand.  
30  
31 60 • To our knowledge, there are very limited data regarding ethnicity and HRQOL. Due to the  
32  
33 61 high participation rate from Māori, we were able to evaluate the impact of ethnicity on HRQOL.  
34  
35

36 62

37  
38  
39 **Limitations:**

- 40  
41 64 • Due to the lack of NZ HRQOL data, comparisons have been made with population groups of  
42  
43 65 varying age ranges, which may have affected results.  
44  
45 66 • The study participants were a referred cohort, which means our findings are not  
46  
47 67 representative of the general population. The data from the Victorian cohort were collected in  
48  
49 68 2000, and the differences noted may have been impacted by the difference in dates of data  
50  
51 69 collection.  
52  
53  
54  
55  
56  
57  
58  
59  
60

1  
2  
3 70 • Mean BMI SDS for the Victorian cohort identified as obese was not available, which would  
4  
5  
6 71 be important if it was considerably lower than the Whānau Pakari participants.

7  
8 72 • There were no adjustments for multiple comparisons in our statistical analyses; due to the  
9  
10  
11 73 inflated likelihood of Type I errors, our findings (particularly from exploratory analyses) need to  
12  
13 74 be interpreted accordingly.

14  
15 75

## 17 76 INTRODUCTION

18  
19  
20 77

21  
22 78 Obesity in childhood and adolescence is known to be associated with weight-related  
23  
24 79 comorbidities.<sup>1</sup> Indigenous populations often have higher rates of obesity compared with non-  
25  
26  
27 80 indigenous counterparts where this information has been collated.<sup>2,3</sup> In New Zealand,  
28  
29 81 approximately 11% of New Zealand children aged two to fourteen years are classed as obese,  
30  
31 82 with Māori (New Zealand's indigenous population) being 1.6 times more likely to be in the  
32  
33  
34 83 obese range compared with non-Māori counterparts.<sup>3</sup> In addition, children living in households  
35  
36 84 in the most socioeconomically deprived quintile for New Zealand are five times more likely to  
37  
38 85 be in the obese range than children living in the least deprived areas.<sup>3</sup> In the United States,  
39  
40 86 whilst rates of children with obesity are not readily available for American Indian populations,  
41  
42  
43 87 rates of Type 2 diabetes mellitus (a known weight-related comorbidity) are higher.<sup>2</sup>

44  
45  
46 88

47  
48 89 Globally, indigenous populations that have experienced historical trauma secondary to  
49  
50 90 colonisation, are over-represented in socioeconomic household deprivation, and both experience  
51  
52  
53 91 the resultant health disparities.<sup>2</sup> The social determinants of health, such as poverty, limited  
54  
55 92 educational attainment, and critically the loss of a traditional diet all contribute to the impact on  
56  
57  
58  
59  
60

1  
2  
3 93 these population groups in terms of health and well-being.<sup>2</sup> Overweight and obesity in  
4  
5 94 adolescence have been shown to be strongly associated with medical complications, including an  
6  
7  
8 95 increase in cardiovascular mortality in adulthood.<sup>4</sup> Emerging evidence suggests that obesity also  
9  
10 96 affects the emotional health and well-being of children and adolescents, commonly referred to as  
11  
12 97 health-related quality of life (HRQOL).<sup>5</sup> However, little is known about the HRQOL of  
13  
14 98 indigenous children and adolescents, especially as it pertains to weight. Previous research has  
15  
16 99 found that Sami (the indigenous people of Sweden) children experience lower HRQOL in some  
17  
18 100 domains compared with Swedish children in general.<sup>6</sup> In relation to HRQOL as it pertains to  
19  
20 101 weight, and the impact of ethnicity, it is acknowledged that information about the relationship  
21  
22 102 between HRQOL and weight may not have transferability from one cultural context to another,  
23  
24 103 given differing perceptions of body image cross-culturally.<sup>7,8</sup>  
25  
26  
27  
28  
29  
30

31 104  
32 105 Quality of life is a broad construct that encompasses various aspects pertaining to health and  
33  
34 106 well-being.<sup>9</sup> The assessment of HRQOL is increasingly recognised as a necessary component of  
35  
36 107 health and well-being evaluation, assessing physical, emotional, and social health dimensions.<sup>10,</sup>  
37  
38 108 <sup>11</sup> Measurement of HRQOL has been shown to have utility in paediatric healthcare settings  
39  
40 109 encompassing numerous chronic health conditions<sup>12-14</sup> and in the assessment of health in young  
41  
42 110 adults.<sup>9</sup>  
43  
44  
45

46 111  
47  
48 112 Obesity during childhood is associated with impaired HRQOL. In one United States (US) study,  
49  
50 113 106 children and adolescents with severe obesity attending an obesity clinic reported  
51  
52 114 significantly lower HRQOL than 401 healthy weight comparison children recruited through  
53  
54 115 private practice paediatrician offices and health clinics, and similar HRQOL to 106 children and  
55  
56  
57  
58  
59  
60

1  
2  
3 116 adolescents undergoing chemotherapy for cancer.<sup>15</sup> The HRQOL of 9 to 12-year-old children  
4  
5 117 enrolled in an Australian community-based longitudinal study was significantly lower among  
6  
7  
8 118 those with obesity versus those without obesity, with the differences not as marked as in the US  
9  
10 119 study, but more likely to represent those of children with obesity not being seen in a specialised  
11  
12 120 clinic setting.<sup>16</sup> Pooled results from 22 cross-sectional and population-based studies report that  
13  
14 121 children and adolescents with obesity have reduced overall HRQOL compared with normal  
15  
16 122 weight counterparts, with 12 of these studies demonstrating an inverse relationship between  
17  
18 123 overall HRQOL and weight status.<sup>5</sup> Potential factors contributing to HRQOL in child and  
19  
20 124 adolescent populations with obesity include treatment seeking versus community counterparts,  
21  
22 125 gender, age, and weight-related comorbidities.<sup>5</sup>  
23  
24  
25  
26  
27 126

28  
29 127 Alongside, and likely to be contributing to lower HRQOL, children and adolescents with obesity  
30  
31 128 are at increased risk of behavioural and emotional difficulties. In addition to differences in  
32  
33 129 HRQOL, studies have found concerning levels of internalising (anxiety/depression, social  
34  
35 130 withdrawal, and somatic complaints) and externalising behaviours (delinquency and rule-  
36  
37 131 breaking behaviours) in children and adolescents with obesity.<sup>17,18</sup> Others have identified higher  
38  
39 132 rates of depression, behavioural problems, and low self-esteem in adolescents with obesity  
40  
41 133 attending obesity clinics compared to affected counterparts in the community.<sup>19</sup> Children who  
42  
43 134 are overweight and obese have also been shown to be at risk for psychosocial difficulties such as  
44  
45 135 body image concerns, and emotional, social, and school difficulties.<sup>20</sup>  
46  
47  
48  
49  
50  
51 136

52  
53 137 Currently there are no published data on the HRQOL of children and adolescents with obesity in  
54  
55 138 New Zealand. To our knowledge, there has only been quality of life data published on oral  
56  
57  
58  
59  
60



1  
2  
3 139 quality of life as it relates to dental caries,<sup>21</sup> and Type 1 diabetes in New Zealand.<sup>14</sup> In addition,  
4  
5 140 there is an absence of cross-cultural evaluation of obesity and HRQOL. In this study, we aimed  
6  
7  
8 141 to describe the HRQOL (parent and child reports) and behavioural and emotional problems of  
9  
10 142 children and adolescents with obesity at enrolment in a multi-disciplinary obesity intervention  
11  
12 143 programme. In addition, we compared this cohort to other populations or to normative data, and  
13  
14 144 also examined potential ethnic differences between indigenous and non-indigenous children and  
15  
16 145 adolescents. It was hypothesised that obesity is associated with lower HRQOL in New Zealand  
17  
18 146 children and adolescents with obesity.  
19

20 147

21  
22  
23  
24 148 **METHODS**25  
26  
27 149

28  
29 150 Children and adolescents were recruited into “Whānau Pakari”, a community-based, unblinded  
30  
31 151 randomised controlled trial of a multi-disciplinary obesity intervention programme,<sup>22</sup> based in  
32  
33 152 Taranaki (New Zealand). This region has a population of 23,139 children aged 0-15 years, of  
34  
35 153 whom 81% identify as New Zealand European, 28% as Māori, and 1% as other ethnicity.<sup>23</sup>  
36  
37 154 Eligibility was defined by residence in Taranaki, being aged 4.8 to 16.8 years, and either in obese  
38  
39 155 [body mass index (BMI)  $\geq 98^{\text{th}}$  centile], or overweight (BMI  $> 91^{\text{st}}$  centile) categories with  
40  
41 156 weight-related comorbidities.<sup>24</sup> However, only obese participants were included in the study  
42  
43 157 reported here. Referrals were received between January 2012 and August 2014 from a wide  
44  
45 158 range of health professionals (including paediatricians, primary care providers, and public health  
46  
47 159 nurses), Māori health workers, school counsellors and self-referrals. This study examines  
48  
49 160 elements of the baseline demographic data.  
50  
51  
52

53  
54  
55 161  
56  
57  
58  
59  
60

1  
2  
3 162 Ethics approval for the programme was granted by the New Zealand Health and Disability Ethics  
4  
5 163 Committee (CEN/11/09/054). Written and verbal informed consents were obtained from all  
6  
7  
8 164 participants or their guardians. The trial was registered with the Australian New Zealand Clinical  
9  
10 165 Trials Registry (ANZCTR: 12611000862943).

11  
12 166  
13  
14 167 **Assessments**

15  
16 168 Participants underwent a baseline assessment at home, which included taking anthropometric  
17  
18 169 measurements, a medical history and weight-related physical examination, dietary history,  
19  
20 170 physical activity questionnaire, and completion of psychometric questionnaires. Questions  
21  
22 171 pertaining to family structure, developmental history, presence/absence of headaches, difficulty  
23  
24 172 getting to sleep, and presence/absence of breathing pauses were all included in the weight-related  
25  
26 173 medical history. Randomisation into 6 monthly assessments and advice or the intervention arm  
27  
28 174 occurred if the participants indicated willingness to make healthy lifestyle change.<sup>22</sup> The  
29  
30 175 intervention consisted of weekly sessions delivered by a multi-disciplinary team for 12 months  
31  
32 176 including physical activity, dietary advice, and psychology sessions (for example, self-esteem,  
33  
34 177 the importance of sleep, how to make and persist with healthy lifestyle change).

35  
36 178  
37  
38 179 **Measures**

39  
40 180 BMI percentile and standard deviation score (SDS) were calculated using UK Cole normative  
41  
42 181 data<sup>25</sup> with the KIGS auxology software (Pfizer Endocrine Care TM). Socioeconomic  
43  
44 182 deprivation was measured at the household level using the New Zealand Deprivation Index 2006.  
45  
46 183 <sup>26</sup> This area level deprivation index is a well-validated measure of socioeconomic deprivation in  
47  
48 184 New Zealand, which is derived from national census data on nine socioeconomic characteristics.

49  
50  
51  
52  
53  
54  
55  
56  
57  
58  
59  
60

1  
2  
3 186 Quality of life was measured using the Pediatric Quality of Life Inventory (PedsQL)<sup>TM</sup>, which  
4  
5 187 has been specifically designed to evaluate HRQOL in children and adolescents. The PedsQL  
6  
7  
8 188 questionnaire has both parent-proxy and child self-report versions, which take approximately 5  
9  
10 189 minutes to administer. It consists of a 23-item Generic Core Scale that assesses problems over  
11  
12 190 the preceding month related to Physical, Emotional, Social and School functioning.<sup>11, 13</sup> The  
13  
14 191 reliability of this instrument has been demonstrated in ages 2-16 years as excellent ( $\alpha = 0.89$   
15  
16 192 child; 0.92 parent report) with acceptable construct validity, in a large population survey in the  
17  
18 193 US (n=10,241), with white, Hispanic/Latino, black/African American, Asian/Pacific Islander,  
19  
20 194 American Indian and Native Alaskan participants.<sup>27</sup> A meaningful cut-off to identify those at  
21  
22 195 risk of impaired HRQOL has been proposed as one SD below the population mean.<sup>27</sup> Individual  
23  
24 196 questions for each area are reverse scored and linearly transformed into a 0-100 scale, where  
25  
26 197 higher scores indicate better HRQOL.  
27  
28  
29  
30  
31  
32  
33

34 199 The existence of behavioural difficulties was assessed using the Achenbach Child Behaviour  
35  
36 200 Checklist (CBCL) ages 1.5-5 and ages 6-18 (parent report) and Youth Self Report (YSR) for  
37  
38 201 ages 11-18.<sup>28</sup> The CBCL/YSR generate ratings of behavioural, emotional, and social problems.  
39  
40 202 The CBCL can be completed by parents, caregivers, or others who see children in family  
41  
42 203 contexts, or by the young person themselves in the case of the youth self-report (YSR). When the  
43  
44 204 young person completed the YSR, no parent CBCL report was obtained in order to reduce the  
45  
46 205 burden of assessment on the family. Subscale scores for the YSR and the CBCL are calculated  
47  
48 206 for a number of behavioural and psychological problems such as aggressive behaviour, and  
49  
50 207 somatic complaints. Subscales are then combined to obtain overall *T*-scores for *internalising* and  
51  
52 208 *externalising* problems. Aggregate scores that represent *normal*, *borderline*, or *clinical* behaviour  
53  
54  
55  
56  
57  
58  
59  
60

1  
2  
3 209 are based on quartiles from a normative sample.<sup>28</sup> The normative data for the CBCL/YSR has  
4  
5 210 been derived from the 1999 National Survey of Children, Youth and Adults, a US population  
6  
7 211 survey of 2,029 children and adolescents of four ethnic groups (60% Latino white, 20% African  
8  
9 212 American, 12% Mixed other, and 9% Latino), of mixed socioeconomic status (33% “upper”,  
10  
11 213 16% “lower”), equal gender split, and ranging in age from 6-18 years.<sup>29</sup>  
12  
13  
14  
15  
16  
17

### 18 **Data analyses**

19  
20 216 PedsQL scores from the children and adolescents enrolled in this study were compared to three  
21  
22 217 populations using 2-sample t-tests. These comparison populations were:  
23

24 218 1) A predominantly normal weight cohort of children from the Taranaki region (n=42) with a  
25  
26 219 long-term chronic condition (Type 1 diabetes), with a mean age of 11.5 years (range 2-17 years),  
27  
28 220 who were predominantly of New Zealand European [71%] or Māori [19%] ethnicity, and with  
29  
30 221 representation from all levels of household deprivation.<sup>14</sup> This cohort was utilised as they were  
31  
32 222 resident in the same region as Whānau Pakari participants, and the only group of New Zealand  
33  
34 223 children for which published HRQOL data using PedsQL exists. Recruitment period was May-  
35  
36 224 July 2013.

37  
38  
39 225 2) A cohort of Australian children (n=63) from the Health of Young Victorians Study (follow-up  
40  
41 226 data collected in 2000), who were identified as having obesity (from the total cohort of n=1456).  
42  
43  
44 227 <sup>16</sup> We utilised Australian data due to the lack of New Zealand data available.  
45  
46  
47

48 228 3) A cohort of Australian children from the above study (follow-up data collected in 2000),  
49  
50 229 identified as having normal weight (n=1099, from the total cohort of n=1456). The children in  
51  
52 230 the entire Health of Young Victorians cohort were aged 10.4 years (range 9-12 years), with  
53  
54  
55 231 representation from all quintiles of socioeconomic disadvantage, but ethnicity of participants was  
56  
57  
58  
59  
60

1  
2  
3 232 not reported.<sup>16</sup> Given that developmental stage may be a contributing factor to HRQOL scores,<sup>5,</sup>  
4  
5 233 <sup>30</sup> the Whānau Pakari cohort comparison was limited to 9-12 years (n=91).  
6  
7  
8 234  
9  
10 235 Exploratory analyses of the PedsQL data examined potential associations between a number of  
11  
12 236 sociodemographic and clinical parameters with parental and child's generic scaled scores  
13  
14  
15 237 separately, using simple linear regressions and one-way ANOVA. Further, multivariable models  
16  
17 238 were used to examine possible associations between either parental or child's generic scaled  
18  
19  
20 239 score and important confounding factors, namely age, sex, ethnicity, and socioeconomic  
21  
22 240 deprivation.  
23  
24  
25 241  
26  
27 242 CBCL and YSR T-scores were utilised. One-tailed one-sample proportion tests were used to  
28  
29 243 compare the rates of participants classified as borderline clinical or clinical in each CBCL/YSR  
30  
31 244 subscale to the normative data (i.e. expected to be  $\leq 7\%$  of the population). Exploratory analyses  
32  
33 245 using generalized linear regression models also examined the likelihood of displaying  
34  
35 246 behavioural and emotional problems (i.e. having CBCL/YSR scores in the borderline or clinical  
36  
37 247 ranges) in association with certain demographic parameters, adjusting only for source of test  
38  
39 248 scores (i.e. parent or youth). A similarly constructed multivariable model was also run adjusting  
40  
41 249 for age, sex, ethnicity, and socioeconomic deprivation. These results are provided as relative  
42  
43 250 risks (RR) and respective 95% confidence intervals (CI). Data were analysed in Minitab v.16  
44  
45  
46 251 (Pennsylvania State University, State College, PA, USA) and SAS v.9.4 (SAS Institute, Cary,  
47  
48 252 NC, USA). All statistical tests (except one-sample proportion tests) were two-tailed. Significance  
49  
50  
51 253 level was maintained at  $p < 0.05$ , with no adjustments for multiple comparisons.  
52  
53  
54  
55 254  
56  
57  
58  
59  
60

## 255 RESULTS

256

257 After exclusion of 6 participants who were in the overweight category, enrolled participants  
258 (n=233) had a mean age of 10.6 years (range 4.8-16.8 years), 52% were females, and the sample  
259 were predominantly either of Māori (45%) or New Zealand European (45%) ethnicity. Nearly a  
260 third (30%) resided in households among the most deprived quintile (compared with 15%  
261 amongst the population of Taranaki).<sup>26, 31, 32</sup> Forty-two percent of Māori participants were from  
262 the most deprived quintile of household deprivation, compared with 20% of New Zealand  
263 European participants (p<0.001). BMI SDS at enrolment was 3.12 (SD=0.57, range 2.01-5.34  
264 SDS). Demographics of family and medical history have been previously reported for the total  
265 cohort.<sup>33</sup> In brief, among our 233 participants, living arrangements included a two-parent  
266 household for half of the participants (n=119, 52%), one-parent household (mother) for 38%  
267 (n=87), one-parent household (father) for 4% (n=10), and other arrangement for 6% (n=14).  
268 Headaches were prevalent in 32% (n=75), 32% of participants had difficulties getting to sleep  
269 (n=75), 20% had breathing pauses (n=47), and 9% had developmental concerns (n=20).

### 271 *Quality of life*

272 The PedsQL scores of our study's participants and those of another study population in Taranaki  
273 are shown in Table 1. There was a moderately positive correlation between overall quality of life  
274 scores derived from child compared with parental reports (r=0.55; p<0.001). However, for all  
275 three PedsQL measures, parents scored their children's HRQOL as being lower than that reported  
276 by the participants themselves (Table 1).

277

278 **Table 1.** Unadjusted PedsQL total generic scaled scores, as well as psychosocial and physical  
 279 scaled scores (out of 100) for Whānau Pakari participants compared to other Taranaki children  
 280 with Type 1 diabetes (predominantly normal weight).<sup>14</sup> Whānau Pakari data are mean ± SD  
 281 (95% confidence interval of the mean), while other data are mean ± SD.

|                  |                            | Whānau Pakari               | Type 1 diabetes       |
|------------------|----------------------------|-----------------------------|-----------------------|
| <b>Location</b>  |                            | Taranaki, New Zealand       | Taranaki, New Zealand |
| <b>Source</b>    |                            | This study                  | Mills et al. 2015     |
| <b>n</b>         |                            | 233                         | 42                    |
| <b>Age range</b> |                            | 4.8-16.8 years              | 2-17 years            |
| <b>Child</b>     | Total generic scaled score | 72.2 ± 16.2 (70.1, 74.3)††† | 74.6 ± 15.3           |
|                  | Psychosocial scaled score  | 69.4 ± 18.6 (67.0, 71.8)††† | 71.2 ± 17.1           |
|                  | Physical scaled score      | 76.9 ± 16.7 (74.8, 79.1)††† | 80.8 ± 15.3           |
| <b>Parent</b>    | Total generic scaled score | 65.1 ± 16.0 (63.0, 67.1)    | 75.9 ± 13.4***        |
|                  | Psychosocial scaled score  | 64.1 ± 17.3 (61.9, 66.3)    | 73.7 ± 13.1***        |
|                  | Physical scaled score      | 66.3 ± 20.3 (63.6, 68.9)    | 79.9 ± 17.9***        |

282 \*\*\*p<0.001 for comparison with Whānau Pakari; †††p<0.001 for a difference between child and parental scores

283  
 284 The Whānau Pakari participants reported similar HRQOL scores to Taranaki youth who were  
 285 predominantly normal weight but with a chronic condition<sup>14</sup> (Table 1). However, youth with  
 286 obesity in Whānau Pakari had consistently lower HRQOL scores than normal-weight Australian  
 287 children (p<0.001; Table 2), and a community sample with obesity.<sup>16</sup> Whānau Pakari parents  
 288 reported that their children had lower HRQOL than those reported by the parents of all three of  
 289 the comparison groups (p<0.001; Tables 1 and 2).

290  
 291 **Table 2.** Unadjusted PedsQL total generic scaled scores, as well as psychosocial and physical  
 292 scaled scores (out of 100) for Whānau Pakari participants aged 9 to 12 years, compared to  
 293 children and adolescents of two reference populations with a matching age range.<sup>14, 16</sup> Whānau  
 294 Pakari data are mean ± SD (95% confidence interval of the mean), while other data are mean ±  
 295 SD.

|                 | Whānau Pakari         | Normal weight       | Obese               |
|-----------------|-----------------------|---------------------|---------------------|
| <b>Location</b> | Taranaki, New Zealand | Victoria, Australia | Victoria, Australia |



| Source                     | This study                  | Williams et al. 2005 | Williams et al. 2005 |
|----------------------------|-----------------------------|----------------------|----------------------|
| <b>n</b>                   | 91                          | 1099                 | 63                   |
| <b>Age range</b>           | 9-12 years                  | 9-12 years           | 9-12 years           |
| <b>Child</b>               |                             |                      |                      |
| Total generic scaled score | 69.0 ± 15.9 (65.7, 72.3)††† | 80.5 ± 12.2***       | 74.0 ± 14.2*         |
| Psychosocial scaled score  | 65.8 ± 18.4 (61.9, 69.6)†   | 77.7 ± 14.1***       | 72.1 ± 14.1*         |
| Physical scaled score      | 74.9 ± 15.7 (71.6, 78.2)††† | 85.7 ± 12.4***       | 77.5 ± 17.9          |
| <b>Parent</b>              |                             |                      |                      |
| Total generic scaled score | 63.4 ± 14.0 (60.5, 66.3)    | 83.1 ± 12.5***       | 75.0 ± 14.5***       |
| Psychosocial scaled score  | 61.5 ± 15.1 (58.4, 64.7)    | 77.6 ± 14.5***       | 73.9 ± 15.3***       |
| Physical scaled score      | 66.7 ± 17.7 (63.0, 70.3)    | 87.8 ± 14.3***       | 76.3 ± 17.6**        |

\*p<0.05, \*\*p<0.01, and \*\*\*p<0.001 for comparison with Whānau Pakari; †p<0.05 and †††p<0.001 for a difference between child and parental scores

Exploratory analyses showed consistent associations between child and parent total generic scaled scores, and certain sociodemographic and clinical parameters, indicating worse overall quality of life with participants who had breathing pauses (p=0.0439 child and p<0.001 parent respectively), reported difficulty getting to sleep (p=0.019 and p<0.001), history of headaches (p=0.023 and p=0.022), developmental problems (p<0.001 and p<0.001), and a father being identified as the sole/primary caregiver as opposed to children living in two-parent families (p=0.010 and p=0.031). In multivariable models, there was evidence that child and parental generic scaled scores decreased in older children ( $\beta$ =-0.70 and p=0.031,  $\beta$ =-0.64 and p=0.047, respectively), but there were no apparent associations with sex, ethnicity, or household deprivation within our cohort.

### Child Behaviour Checklist

Of the total cohort for this study, 232 participants/parents completed the CBCL/YSR. The median CBCL/YSR total score was 58 (interquartile range =15.0). The distribution of participants' scores is shown in Figure 1.



1  
2  
3 315 **Figure 1.** The frequency distribution of participants according to the Child Behaviour Checklist  
4  
5 316 (CBCL) and Youth Self Report (YSR) total scores.  
6  
7  
8 317

9  
10 318 Just over half of the participants had CBCL/YSR total scores in the normal range (56.5%), while  
11  
12 319 the remaining 43.5% had scores in the borderline clinical (15.5%) and clinical (28.0%) ranges  
13  
14 320 (Figure 1; Table 3). From US normative data previously described, the overall proportion of  
15  
16 321 population falling into the borderline clinical or clinical range is  $\leq 7\%$ .<sup>29</sup> This means that  
17  
18 322 children in our study had a prevalence of emotional and behavioural problems that was more  
19  
20 323 than 6 times higher ( $p < 0.001$ ) than normative populations.  
21  
22 324

23  
24 325 The classification of participants according to individual CBCL/YSR subscales (both parent  
25  
26 326 report and youth report) are shown in Table 3. Missing data on subscales for parent report are  
27  
28 327 due to the absence of these subscales in the questionnaire for 1.5-5-year-olds. Based on  
29  
30 328 CBCL/YSR findings, children and adolescents in our cohort were significantly more likely to  
31  
32 329 display emotional and behavioural difficulties than those in the general population. Compared to  
33  
34 330 normative data, the proportion of participants in borderline clinical or clinical ranges was  
35  
36 331 considerably greater for all subscales (Table 3).  
37  
38 332  
39  
40  
41  
42  
43  
44

45 333 **Table 3.** Proportion of participants with T-scores from Child Behavior Checklist (CBCL)/Youth  
46  
47 334 Self Report (YSR) falling into normal, borderline clinical, and clinical ranges at baseline, as per  
48  
49 335 parental and youth assessments. Data are n (%).

| Assessment | CBCL/YSR subscale  | n   | Normal <sup>a</sup> | Borderline clinical <sup>b</sup> | Clinical <sup>c</sup> |
|------------|--------------------|-----|---------------------|----------------------------------|-----------------------|
| Parent     | Anxious            | 128 | 110 (85.9%)*        | 8 (6.3%)                         | 10 (7.8%)             |
|            | Withdrawn          | 128 | 92 (71.9%)*         | 26 (20.3%)                       | 10 (7.8%)             |
|            | Somatic complaints | 128 | 98 (76.6%)*         | 20 (15.6%)                       | 10 (7.8%)             |

|              |                        |     |              |            |            |
|--------------|------------------------|-----|--------------|------------|------------|
|              | Social difficulties    | 100 | 70 (7.0%)*   | 20 (20.0%) | 10 (10.0%) |
|              | Thought problems       | 100 | 80 (80.0%)*  | 7 (7.0%)   | 13 (13.0%) |
|              | Attention difficulties | 128 | 110 (85.9%)* | 9 (7.0%)   | 9 (7.0%)   |
|              | Rule breaking          | 100 | 76 (76.0%)*  | 16 (16.0%) | 8 (8.0%)   |
|              | Aggressive             | 128 | 102 (79.7%)* | 18 (14.1%) | 8 (6.3%)   |
|              | Internalising          | 128 | 68 (53.1%)*  | 22 (17.2%) | 38 (29.7%) |
|              | Externalising          | 128 | 72 (56.3%)*  | 24 (18.8%) | 32 (25.0%) |
|              | Total                  | 128 | 71 (55.5%)*  | 19 (14.8%) | 38 (29.7%) |
| <b>Youth</b> | Anxious                | 104 | 88 (84.6%)*  | 12 (11.5%) | 4 (3.9%)   |
|              | Withdrawn              | 104 | 79 (76.0%)*  | 16 (15.4%) | 9 (8.7%)   |
|              | Somatic complaints     | 104 | 79 (76.0%)*  | 15 (14.4%) | 10 (9.7%)  |
|              | Social difficulties    | 104 | 84 (80.8%)*  | 11 (10.6%) | 9 (8.7%)   |
|              | Thought problems       | 104 | 93 (89.4%)*  | 8 (7.7%)   | 3 (2.9%)   |
|              | Attention difficulties | 104 | 81 (77.9%)*  | 15 (14.4%) | 8 (7.7%)   |
|              | Rule breaking          | 104 | 86 (82.7%)*  | 16 (15.4%) | 2 (1.9%)   |
|              | Aggressive             | 104 | 91 (87.5%)*  | 7 (6.7%)   | 6 (5.8%)   |
|              | Internalising          | 104 | 62 (59.6%)*  | 15 (14.4%) | 27 (26.0%) |
|              | Externalising          | 104 | 76 (73.1%)*  | 10 (9.6%)  | 18 (17.3%) |
|              | Total                  | 104 | 60 (57.7%)*  | 17 (16.4%) | 27 (26.0%) |

*Note.* <sup>a</sup>< 65 which is below 93<sup>rd</sup> centile

<sup>b</sup>65-70 which is 93-98<sup>th</sup> centile (apart from internalising/externalising/total 60-63)

<sup>c</sup>>70 which is 98<sup>th</sup> centile (apart from internalising/externalising/total >63)

\*\*\*p<0.001 for comparison with normative data (i.e. expected ≤7% of participants in borderline clinical or clinical ranges combined)

Exploratory analyses showed a higher probability of behavioural and emotional problems (as per CBCL/YSR total scores) in those who experienced breathing pauses (RR 1.52 [95% CI 1.13–

1  
2  
3 344 2.04]) or displayed developmental problems (RR 1.59 [95% CI 1.11–2.27]). Multivariable  
4  
5 345 analyses showed that older age at assessment was associated with higher CBCL/YSR total scores  
6  
7 346 (i.e. worse scores) ( $\beta=0.89$ ;  $p=0.011$ ), while males were more likely to display behavioural and  
8  
9 347 emotional problems than females (RR 1.43 [95% CI 1.06–1.94]).  
10  
11  
12  
13 348

### 14 15 349 **Ethnic comparisons**

16  
17 350 There were no differences between Māori and New Zealand European participants with obesity  
18  
19 351 with respect to the child's reported overall PedsQL scores ( $p=0.09$ ) or PedsQL psychosocial  
20  
21 352 ( $p=0.14$ ) scores, but Māori children reported higher PedsQL physical scores (80.1 versus 74.7,  
22  
23 353 respectively,  $p=0.019$ ). With respect to parental report, there were no ethnic differences in total  
24  
25 354 quality of life ( $p=0.81$ ), psychosocial ( $p=0.76$ ), or physical ( $p=0.53$ ) scores. There were no  
26  
27 355 differences between Māori and New Zealand European participants on CBCL/YSR total  
28  
29 356 ( $p=0.25$ ), internalising ( $p=0.12$ ), or externalising ( $p=0.71$ ) scores.  
30  
31  
32  
33

### 34 357 35 36 358 **DISCUSSION**

37  
38 359  
39  
40  
41 360 The main findings of this study were that children and adolescents with obesity in this region of  
42  
43 361 New Zealand had lower HRQOL on parent report measures when compared with those with a  
44  
45 362 chronic condition (i.e. diabetes that requires daily testing and treatment), and other samples with  
46  
47 363 and without obesity. In addition, a large proportion (43.5%) obtained CBCL/YSR scores in the  
48  
49 364 clinical and borderline range for experiencing psychological problems. The parent report quality  
50  
51 365 of life scores were not dissimilar to those described in children with obesity attending a specialist  
52  
53 366 clinic, and were similar to children and adolescents diagnosed with cancer.<sup>15</sup> The degree to  
54  
55  
56  
57  
58  
59  
60

1  
2  
3 367 which HRQOL appeared to be affected in our cohort was not surprising, given that treatment-  
4  
5 368 seeking parents of children with obesity are more likely to perceive their child as having a poorer  
6  
7  
8 369 HRQOL and more psychological difficulties when compared with parents of children with  
9  
10 370 obesity in the community not seeking treatment.<sup>5,34</sup> Our cohort consisted of participants referred  
11  
12 371 to an obesity intervention programme, so were not a true community-based sample. Nor were  
13  
14 372 they directly comparable to a hospital outpatient clinic population given that Whānau Pakari was  
15  
16 373 specifically designed to address barriers to access which exist for hospital-based outpatient  
17  
18 374 clinical care, particularly for indigenous children.<sup>22</sup> Allowing for this not being a complete non-  
19  
20 375 referred sample, the difference in HRQOL scores in our cohort compared with a large population  
21  
22 376 based study (n=10,241) of predominantly normal weight children aged 2-16 years (mean score  
23  
24 377 65.4 vs. 81.3) is considerable.<sup>35</sup>  
25  
26  
27 378  
28  
29 379 Differences between parent-proxy and child self-report on PedsQL questionnaires have been  
30  
31 380 previously reported. A systematic review of the relationship between parents and children's  
32  
33 381 HRQOL scores found better agreement among parents and chronically sick children than  
34  
35 382 between parents and their healthy children.<sup>36</sup> It was argued that both parent and child reports  
36  
37 383 should be obtained as they provide different perspectives. A further review noted differences in  
38  
39 384 parent-child agreement in HRQOL across four different instruments.<sup>37</sup> The authors suggested  
40  
41 385 that the disagreement was a consequence of varying individual beliefs about the child's health  
42  
43 386 and well-being, rather than parent or child reports being wrong or right.<sup>37</sup> A Norwegian study  
44  
45 387 reviewed this in relation to children and adolescents seeking treatment for obesity versus a  
46  
47 388 community sample of children of any BMI.<sup>34</sup> Parents reported the quality of life of the children  
48  
49 389 with obesity seeking treatment as lower than those in the community, which was not seen with  
50  
51  
52  
53  
54  
55  
56  
57  
58  
59  
60

1  
2  
3 390 the child self-report.<sup>34</sup> Pooled analyses however showed that paediatric HRQOL can be  
4  
5  
6 391 accurately predicted from parent proxy reports with moderate to strong linear relationships  
7  
8 392 between the two methods of report.<sup>5</sup>  
9

10 393  
11  
12 394 We observed that psychological difficulties were prevalent in our cohort. Our participants aged  
13  
14  
15 395 11 to 18 years reported a mean total YSR score of 55.9 (SD=10.6), which is similar to a small  
16  
17 396 non-clinical group of adolescents with obesity from Turkey (n=30) with a total problem score of  
18  
19 397 58.2 (SD=7.7).<sup>19</sup> We have no national data for comparison with CBCL/YSR, but there is nothing  
20  
21 398 to suggest that scores in the Taranaki region would be higher than those nationally, and there is  
22  
23 399 no known biological or environmental reason for this cohort to have higher rates of mental health  
24  
25 400 problems outside of their obesity. The absence of Paediatric psychology services are a notable  
26  
27 401 issue in the region (child and adolescent mental health services are available), and it is unclear if  
28  
29 402 this may contribute to these findings. The randomised clinical trial we are undertaking will be  
30  
31 403 able to assess if the intervention can address the relationships between these variables over time.  
32  
33 404

34  
35  
36 405 Obesity in childhood is a major health concern in New Zealand, with the third highest prevalence  
37  
38 406 of overweight and obesity in the OECD (Organisation for Economic Co-operation and  
39  
40 407 Development).<sup>38</sup> Recent studies in this cohort of children and adolescents with obesity have  
41  
42 408 found suboptimal eating behaviour,<sup>39</sup> suboptimal physical activity,<sup>40</sup> and a high prevalence of  
43  
44 409 weight-related comorbidities, including hypertension and obstructive sleep apnoea.<sup>33</sup> We were  
45  
46 410 not surprised that breathing pauses were associated with poorer HRQOL and higher total scores  
47  
48 411 on the CBCL/YSR. Breathing pauses in children and adolescents with obesity are associated  
49  
50 412 with obstructive sleep apnoea,<sup>41</sup> and children and adolescents with obesity with this condition  
51  
52  
53  
54  
55  
56  
57  
58  
59  
60

1  
2  
3 413 have reported lower HRQOL total scores than peers with obesity without the condition.<sup>15</sup>  
4  
5 414 Moderate to severe obstructive sleep apnoea is associated with increased rates of aggressive  
6  
7  
8 415 behaviour, attention problems, and internalising problems on the CBCL.<sup>42</sup> These observations  
9  
10 416 are important, given the considerable prevalence of breathing pauses reported in this cohort with  
11  
12 417 obesity,<sup>33</sup> and the wider impact of obstructive sleep apnoea on a child's health, cognitive and  
13  
14 418 behavioural functioning.<sup>43</sup>  
15  
16

17 419  
18  
19  
20 420 Strengths of this study are that it is the first to report HRQOL in children and adolescents with  
21  
22 421 obesity in the New Zealand population. Due to the high participation rate from Māori, we were  
23  
24 422 also able to undertake evaluation of the impact of ethnicity. What was interesting and important  
25  
26 423 about our findings in terms of ethnicity was the lack of disparity in HRQOL scores. This was  
27  
28 424 despite a larger proportion of Māori participants being from the most deprived quintile of  
29  
30 425 households. It therefore appears that obesity itself rather than factors such as deprivation is the  
31  
32 426 main identified factor in our participants contributing to lower HRQOL scores. This finding is in  
33  
34 427 contrast to previous research in Fiji and Kuwait, where there was no meaningful negative  
35  
36 428 association between increased weight and HRQOL in children aged 12-18 in Fiji, irrespective of  
37  
38 429 ethnicity, or Kuwaiti nationals, aged 10-14 years old.<sup>7,8</sup> The discrepancies in results may be  
39  
40 430 explained by this study reviewing a treatment-seeking group, rather than population-based  
41  
42 431 sample, and the different cultural values assigned to body size in Fiji and Kuwait compared with  
43  
44 432 New Zealand (a westernised society).  
45  
46  
47  
48  
49

50 433  
51  
52  
53 434 A limitation of this study, as with all HRQOL assessments, is the use of an assessment tool to  
54  
55 435 extrapolate one's psychological health and well-being. Comparisons of our study have been  
56  
57  
58  
59  
60

1  
2  
3 436 made with population groups of varying age ranges, which may have affected results. Another  
4  
5  
6 437 limitation of this study is that this was a referred cohort, which means our findings are not  
7  
8 438 necessarily representative of the general population, and therefore generalisability of findings to  
9  
10 439 wider population groups is reduced. We compared our data with the Health of Young Victorians  
11  
12 440 cohort from Australia, as this was the most comparable group we had access to. However, the  
13  
14 441 data were collected in 2000, and the differences noted may have been impacted by the difference  
15  
16 442 in dates of data collection. Mean BMI SDS for the Victorian cohort with obesity was not  
17  
18 443 available, which would be important if it was considerably lower than the Whānau Pakari  
19  
20 444 participants. Lastly, we made no adjustments for multiple comparisons in our statistical analyses,  
21  
22 445 so that the findings (particularly from exploratory analyses) need to be interpreted accordingly.  
23  
24  
25  
26  
27  
28

29 447 In conclusion, this study highlights a lower HRQOL and a higher prevalence of psychological  
30  
31 448 difficulties for this referred community-based group of children and adolescents with obesity  
32  
33 449 compared with normative population data. No differences were found between Māori and New  
34  
35 450 Zealand Europeans. This is despite Māori being represented in greater numbers in the more  
36  
37 451 deprived households of the region compared with their non-Māori counterparts, suggesting that  
38  
39 452 obesity itself rather than deprivation is the main contributor to lower HRQOL scores. This study  
40  
41 453 highlights the importance of psychologist involvement and screening in the child and adolescent  
42  
43 454 population with obesity as part of any multi-disciplinary team. Improvement in HRQOL should  
44  
45 455 be considered a goal of all child and adolescent obesity intervention and management. Further  
46  
47 456 research is required to ascertain how to maximise improvements in what is now recognised as an  
48  
49 457 important health outcome.  
50  
51  
52  
53  
54

55 458  
56  
57  
58  
59  
60

1  
2  
3 459 **Acknowledgements**  
4

5  
6 460 The authors would like to acknowledge Dr John Doran (Taranaki District Health Board), Diana  
7  
8 461 O'Neill, and Dr Pat Tuohy (Ministry of Health) for their support of the trial; Taranaki District  
9  
10 462 Health Board and Sport Taranaki for funding of the clinical service, and Gerard Dolan and Dr  
11  
12 463 Rebecca Storey for their assistance with initial methodology surrounding psychology  
13  
14  
15 464 questionnaires. The Quality of Life study described in this paper was carried out using the  
16  
17 465 PedsQL™, developed by Dr James W. Varni.  
18  
19

20 466

21  
22 467 **Funding statement**  
23

24 468 This work has been funded by grants from the Health Research Council of New Zealand, Royal  
25  
26  
27 469 Australasian College of Physicians, the Maurice and Phyllis Paykel Trust, Taranaki Medical  
28  
29 470 Foundation, and Lotteries Health Research.  
30  
31

32 471

33  
34 472 **Competing interests**  
35

36 473 All authors have completed the ICMJE uniform disclosure at [www.icmje.org/coi\\_disclosure.pdf](http://www.icmje.org/coi_disclosure.pdf)  
37  
38 474 and declare: financial support for the submitted work from the Health Research Council of New  
39  
40  
41 475 Zealand, Royal Australasian College of Physicians, the Maurice and Phyllis Paykel Trust,  
42  
43 476 Taranaki Medical Foundation, and Lotteries Health Research; YCA and PLH have been  
44  
45  
46 477 recipients of these grants to undertake clinical research in relation to Whānau Pakari, YCA has  
47  
48 478 been paid in a fellowship capacity from the Health Research Council of New Zealand, TLC has  
49  
50  
51 479 been paid as a research assistant, JGBD has been paid for data analysis.  
52

53 480

54  
55 481 **Contributorship statement**  
56  
57  
58  
59  
60



1  
2  
3 482 YCA designed the study, was involved with data interpretation, and drafted this manuscript.  
4  
5  
6 483 LEW recruited participants, and undertook assessments and data entry. KFT provided  
7  
8 484 psychologist oversight and analysis of patient data. CCG is secondary supervisor for the research  
9  
10 485 team, and assisted with the interpretation of the study. JMS was involved in study design. TLC  
11  
12 486 assisted with data entry and analysis. TAW was involved in interpretation of data. JGBD  
13  
14 487 analysed the data and drafted the manuscript. WSC contributed to study design. PLH contributed  
15  
16 488 to study design and supervises the research team. All authors critically revised the manuscript,  
17  
18 489 gave final approval for the version to be published, and are accountable for all aspects of the  
19  
20 490 work.  
21  
22  
23  
24  
25

491

#### 492 **Data sharing statement**

26  
27  
28  
29 493 Data cannot be made available in a public repository due to the strict conditions of the ethics  
30  
31 494 approval of this study. Nonetheless, anonymised and de-identified data will be made available to  
32  
33 495 other investigators upon request. Interested readers should contact the senior author Prof Paul  
34  
35 496 Hofman (p.hofman@auckland.ac.nz) to obtain the data.  
36  
37  
38  
39  
40  
41

497

#### 498 **References**

- 42  
43  
44  
45  
46 499 1. Lakshman R, Elks CE, Ong KK. Childhood obesity. *Circulation* 2012;126(14):1770-9.  
47  
48  
49 500 2. Smylie J, Adomako P. *Indigenous children's health report: Health assessment in action*.  
50  
51 Toronto: The Centre for Research on Inner City Health; 2009 [accessed 16 Nov 2014]. Available  
52  
53 501 from: [http://www.stmichaelshospital.com/crich/wp-content/uploads/ichr\\_report-web.pdf](http://www.stmichaelshospital.com/crich/wp-content/uploads/ichr_report-web.pdf)  
54  
55 502  
56  
57  
58  
59  
60

- 1  
2  
3 503 3. Ministry of Health, New Zealand. *Annual Update of Key Results 2014/2015: New Zealand*  
4  
5 504 *Health Survey*. Wellington, New Zealand: Ministry of Health, 2015 [accessed 12 Apr 2016].  
6  
7 505 Available from: <http://www.health.govt.nz/system/files/documents/publications/annual-update->  
8  
9 506 [key-results-2014-15-nzhs-dec15-1.pdf](http://www.health.govt.nz/system/files/documents/publications/annual-update-key-results-2014-15-nzhs-dec15-1.pdf)  
10  
11  
12  
13  
14 507 4. Twig G, Yaniv G, Levine H, *et al*. Body-mass index in 2.3 million adolescents and  
15  
16 508 cardiovascular death in adulthood. *N Engl J Med* 2016;374:2430-40.  
17  
18  
19  
20 509 5. Tsiros MD, Olds T, Buckley JD, *et al*. Health-related quality of life in obese children and  
21  
22 510 adolescents. *Int J Obes (Lond)* 2009;33(4):387-400.  
23  
24  
25  
26 511 6. Omma L, Petersen S. Health-related quality of life in indigenous Sami schoolchildren in  
27  
28 512 Sweden. *Acta Paediatr* 2015;104(1):75-83.  
29  
30  
31  
32 513 7. Petersen S, Moodie M, Mavoja H, *et al*. Relationship between overweight and health-related  
33  
34 514 quality of life in secondary school children in Fiji: Results from a cross-sectional population-  
35  
36 515 based study. *Int J Obes (Lond)* 2014;38(4):539-46.  
37  
38  
39  
40 516 8. Boodai SA, Reilly JJ. Health related quality of life of obese adolescents in Kuwait. *BMC*  
41  
42 517 *Pediatr* 2013;13:105.  
43  
44  
45  
46 518 9. Varni JW, Limbers CA. The PedsQL™ 4.0 generic core scales young adult version:  
47  
48 519 Feasibility, reliability and validity in a university student population. *J Health Psychol*  
49  
50 520 2009;14(4):611-22.  
51  
52  
53  
54  
55  
56  
57  
58  
59  
60

- 1  
2  
3 521 10. Varni JW, Seid M, Kurtin PS. PedsQL 4.0: Reliability and validity of the pediatric quality of  
4  
5 522 life inventory version 4.0 generic core scales in healthy and patient populations. *Med Care*  
6  
7 523 2001;39(8):800-12.
- 10  
11 524 11. Varni JW, Seid M, Rode CA. The PedsQL: Measurement model for the pediatric quality of  
12  
13 525 life inventory. *Med Care* 1999;37(2):126-39.
- 16  
17 526 12. Chan KS, Mangione-Smith R, Burwinkle TM, *et al.* The PedsQL: Reliability and validity of  
18  
19 527 the short-form generic core scales and asthma module. *Med Care* 2005;43(3):256-65.
- 22  
23 528 13. Varni JW, Seid M, Knight TS, *et al.* The PedsQL™ 4.0 generic core scales: Sensitivity,  
24  
25 529 responsiveness, and impact on clinical decision-making. *J Behav Med* 2002;25(2):175-93.
- 28  
29 530 14. Mills SA, Hofman PL, Jiang Y, *et al.* Health-related quality of life of Taranaki children with  
30  
31 531 type 1 diabetes. *NZ Med J* 2015;128(1427):25-32.
- 34  
35 532 15. Schwimmer JB, Burwinkle TM, Varni JW. Health-related quality of life of severely obese  
36  
37 533 children and adolescents. *JAMA* 2003;289(14):1813-9.
- 40  
41 534 16. Williams J, Wake M, Hesketh K, *et al.* Health-related quality of life of overweight and obese  
42  
43 535 children. *JAMA* 2005;293(1):70-6.
- 46  
47 536 17. Giel KE, Zipfel S, Schweizer R, *et al.* Eating disorder pathology in adolescents participating  
48  
49 537 in a lifestyle intervention for obesity: Associations with weight change, general psychopathology  
50  
51 538 and health-related quality of life. *Obes Facts* 2013;6(4):307-16.
- 53  
54  
55  
56  
57  
58  
59  
60

- 1  
2  
3 539 18. Pervanidou P, Bastaki D, Chouliaras G, *et al.* Internalizing and externalizing problems in  
4  
5 540 obese children and adolescents: Associations with daily salivary cortisol concentrations.  
6  
7 541 *Hormones* 2015;14(4):623-31.  
8  
9  
10  
11 542 19. Erermis S, Cetin N, Tamar M, *et al.* Is obesity a risk factor for psychopathology among  
12  
13 543 adolescents? *Pediatr Int* 2004;46(3):296-301.  
14  
15  
16  
17 544 20. Lim CS, Espil FM, Viana AG, *et al.* Associations between anxiety symptoms and child and  
18  
19 545 family factors in pediatric obesity. *J Dev Behav Pediatr* 2015;36(9):664-72.  
20  
21  
22  
23 546 21. Foster Page LA, Thomson WM. Caries prevalence, severity, and 3-year increment, and their  
24  
25 547 impact upon New Zealand adolescents' oral-health-related quality of life. *J Public Health Dent*  
26  
27 548 2012;72(4):287-94.  
28  
29  
30  
31 549 22. Anderson YC, Wynter LE, Moller KR, *et al.* The effect of a multi-disciplinary obesity  
32  
33 550 intervention compared to usual practice in those ready to make lifestyle changes: Design and  
34  
35 551 rationale of Whanau Pakari. *BMC Obesity* 2015;2(41). doi: 10.1186/s40608-015-0068-y  
36  
37  
38  
39 552 23. Statistics New Zealand. Census 2013: Ethnic group by age group and sex [Internet].  
40  
41 553 Wellington: Statistics New Zealand [accessed 18 November 2014]. Available from:  
42  
43 554 <http://nzdotstat.stats.govt.nz/wbos/Index.aspx?DataSetCode=TABLECODE8021#>.  
44  
45  
46  
47  
48 555 24. Cole TJ. A chart to link child centiles of body mass index, weight and height. *Eur J Clin Nutr*  
49  
50 556 2002;56(12):1194-9.  
51  
52  
53  
54 557 25. Freeman JV, Cole TJ, Chinn S, *et al.* Cross sectional stature and weight reference curves for  
55  
56 558 the UK, 1990. *Arch Dis Child* 1995;73(1):17-24.  
57  
58  
59  
60

- 1  
2  
3 559 26. University of Otago - School of Medicine and Health Science, New Zealand. NZ Deprivation  
4  
5 560 Index 2006 [Internet] [accessed 03 Nov 2014]. Available from:  
6  
7  
8 561 <https://koordinates.com/layer/1066-nz-deprivation-index-2006/>.  
9  
10  
11 562 27. Varni JW, Burwinkle TM, Seid M, *et al*. The PedsQL 4.0 as a pediatric population health  
12  
13 563 measure: Feasibility, reliability, and validity. *Ambul Pediatr* 2003;3(6):329-41.  
14  
15  
16  
17 564 28. Achenbach TM, Ruffle TM. The child behavior checklist and related forms for assessing  
18  
19 565 behavioral/emotional problems and competencies. *Pediatr Rev* 2000;21(8):265-71.  
20  
21  
22  
23 566 29. Achenbach TM, Rescorla LA. Manual for the ASEBA school-aged forms and profiles.  
24  
25 567 Research Centre for Children, Youth & Families. Burlington: University of Vermont, 2001.  
26  
27  
28  
29 568 30. Jansen PW, Mensah FK, Clifford S, *et al*. Bidirectional associations between overweight and  
30  
31 569 health-related quality of life from 4-11 years: Longitudinal study of Australian children. *Int J*  
32  
33 570 *Obes (Lond)* 2013;37(10):1307-13.  
34  
35  
36  
37 571 31. Ministry of Health, New Zealand. Population of Taranaki DHB [Internet]. Wellington, New  
38  
39 572 Zealand; 2015 [accessed 26 Jan 2015]. Available from: [http://www.health.govt.nz/new-zealand-](http://www.health.govt.nz/new-zealand-health-system/my-dhb/taranaki-dhb/population-taranaki-dhb)  
40  
41 573 [health-system/my-dhb/taranaki-dhb/population-taranaki-dhb](http://www.health.govt.nz/new-zealand-health-system/my-dhb/taranaki-dhb/population-taranaki-dhb).  
42  
43  
44  
45  
46 574 32. Atkinson J, Salmond C, Crampton C. NZDep2013 Index of Deprivation [Internet].  
47  
48 575 Wellington, New Zealand; University of Otago 2014 [accessed 03 Apr 2016]. Available from:  
49  
50 576 <http://www.otago.ac.nz/wellington/otago069936.pdf>.  
51  
52  
53  
54  
55  
56  
57  
58  
59  
60

- 1  
2  
3 577 33. Anderson YC, Wynter LE, Treves KF, *et al.* Prevalence of comorbidities in obese New  
4  
5 578 Zealand children and adolescents at enrolment in a community-based obesity programme. *J*  
6  
7 579 *Paediatr Child Health* 2016;52(12):1099-105. doi:10.1111/jpc.13315  
8  
9  
10  
11 580 34. Steinsbekk S, Jozefiak T, Odegard R, *et al.* Impaired parent-reported quality of life in  
12  
13 581 treatment-seeking children with obesity is mediated by high levels of psychopathology. *Qual*  
14  
15 582 *Life Res* 2009;18(9):1159-67.  
16  
17  
18  
19  
20 583 35. Seid M, Varni JW, Cummings L, *et al.* The impact of realized access to care on health-  
21  
22 584 related quality of life: A two-year prospective cohort study of children in the California state  
23  
24 585 children's health insurance program. *J Pediatr* 2006 9;149(3):354-61.  
25  
26  
27  
28 586 36. Eiser C, Morse R. Can parents rate their child's health-related quality of life? Results of a  
29  
30 587 systematic review. *Qual Life Res* 2001;10(4):347-57.  
31  
32  
33  
34 588 37. Upton P, Lawford J, Eiser C. Parent-child agreement across child health-related quality of  
35  
36 589 life instruments: A review of the literature. *Qual Life Res* 2008;17(6):895-913.  
37  
38  
39  
40 590 38. Organisation for Economic Co-operation and Development (OECD). Obesity update 2014.  
41  
42 591 France: Secretary-General of the OECD 2014 [accessed 21 Feb 2015]. Available from:  
43  
44 592 <http://www.oecd.org/els/health-systems/Obesity-Update-2014.pdf>  
45  
46  
47  
48 593 39. Anderson YC, Wynter LE, Butler M, *et al.* Dietary intake and eating behaviours of obese  
49  
50 594 New Zealand children and adolescents enrolled in a community-based intervention programme.  
51  
52 595 *PLoS ONE* 2016;11(11). doi:10.1371/journal.pone.0166996  
53  
54  
55  
56  
57  
58  
59  
60

1  
2  
3 596 40. Anderson YC, Wynter LE, Butler M, *et al.* Physical activity is low in obese New Zealand  
4  
5 597 children and adolescents. *Sci Rep* 2017;7(41822).

6  
7  
8  
9 598 41. Section on Pediatric Pulmonology, Subcommittee on Obstructive Sleep Apnea Syndrome.  
10  
11 599 American Academy of Pediatrics. Clinical practice guideline: Diagnosis and management of  
12  
13 600 childhood obstructive sleep apnea syndrome. *Pediatrics* 2002;109(4):704-12.

14  
15  
16  
17 601 42. Bourke RS, Anderson V, Yang JSC, *et al.* Neurobehavioral function is impaired in children  
18  
19 602 with all severities of sleep disordered breathing. *Sleep Med* 2011;12(3):222-9.

20  
21  
22  
23 603 43. Schechter MS, Section on Pediatric Pulmonology, Subcommittee on Obstructive Sleep  
24  
25 604 Apnea Syndrome. Technical report: Diagnosis and management of childhood obstructive sleep  
26  
27 605 apnea syndrome. *Pediatrics* 2002;109(4):e69.

28  
29  
30  
31  
32 606

33  
34  
35 607  
36  
37  
38  
39  
40  
41  
42  
43  
44  
45  
46  
47  
48  
49  
50  
51  
52  
53  
54  
55  
56  
57  
58  
59  
60



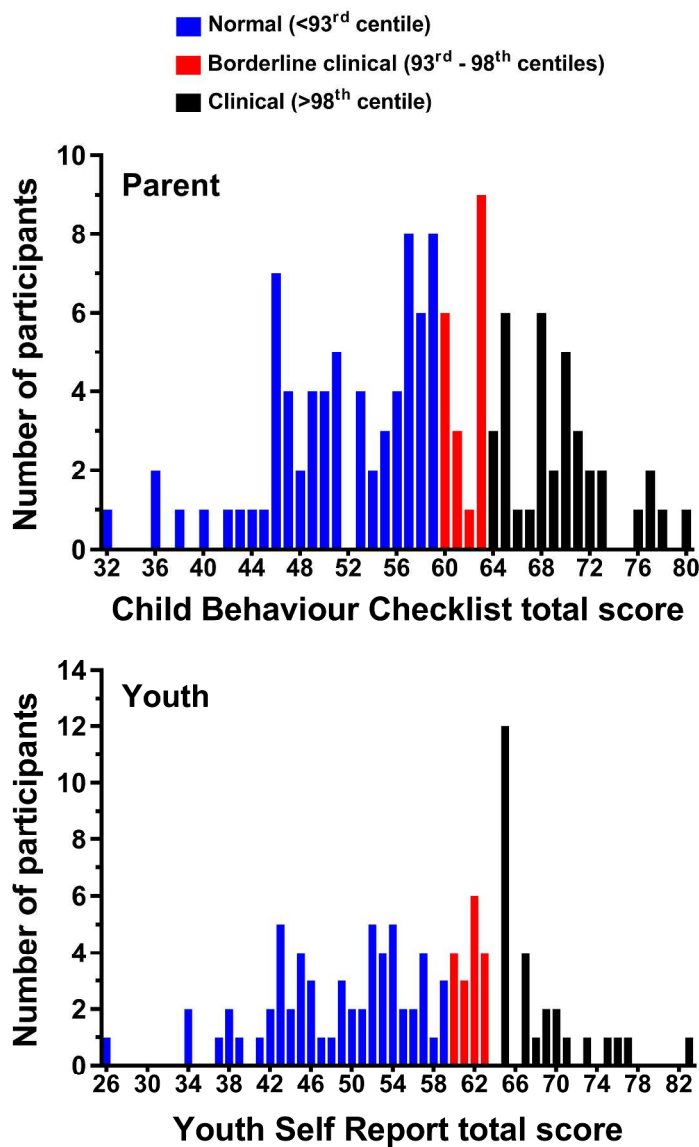

Figure 1. The frequency distribution of participants according to the Child Behaviour Checklist (CBCL) and Youth Self Report (YSR) total scores.

268x387mm (300 x 300 DPI)

## STROBE Statement—checklist of items that should be included in reports of observational studies

|                           | Item No                                                                                                                                                                                                                                                                                                   | Recommendation                                                                                                                                                                                                                                                                                                                                                                                                                                                         | Complete?                                                                              |
|---------------------------|-----------------------------------------------------------------------------------------------------------------------------------------------------------------------------------------------------------------------------------------------------------------------------------------------------------|------------------------------------------------------------------------------------------------------------------------------------------------------------------------------------------------------------------------------------------------------------------------------------------------------------------------------------------------------------------------------------------------------------------------------------------------------------------------|----------------------------------------------------------------------------------------|
| <b>Title and abstract</b> | 1                                                                                                                                                                                                                                                                                                         | (a) Indicate the study's design with a commonly used term in the title or the abstract                                                                                                                                                                                                                                                                                                                                                                                 | ✓(1-2) 'enrolment' indicates baseline measures                                         |
|                           |                                                                                                                                                                                                                                                                                                           | (b) Provide in the abstract an informative and balanced summary of what was done and what was found                                                                                                                                                                                                                                                                                                                                                                    | ✓(2-3)                                                                                 |
| <b>Introduction</b>       |                                                                                                                                                                                                                                                                                                           |                                                                                                                                                                                                                                                                                                                                                                                                                                                                        |                                                                                        |
| Background/rationale      | 2                                                                                                                                                                                                                                                                                                         | Explain the scientific background and rationale for the investigation being reported                                                                                                                                                                                                                                                                                                                                                                                   | ✓(4-7)                                                                                 |
| Objectives                | 3                                                                                                                                                                                                                                                                                                         | State specific objectives, including any prespecified hypotheses                                                                                                                                                                                                                                                                                                                                                                                                       | ✓(6-7)                                                                                 |
| <b>Methods</b>            |                                                                                                                                                                                                                                                                                                           |                                                                                                                                                                                                                                                                                                                                                                                                                                                                        |                                                                                        |
| Study design              | 4                                                                                                                                                                                                                                                                                                         | Present key elements of study design early in the paper                                                                                                                                                                                                                                                                                                                                                                                                                | ✓(7)                                                                                   |
| Setting                   | 5                                                                                                                                                                                                                                                                                                         | Describe the setting, locations, and relevant dates, including periods of recruitment, exposure, follow-up, and data collection                                                                                                                                                                                                                                                                                                                                        | ✓(7)                                                                                   |
| Participants              | 6                                                                                                                                                                                                                                                                                                         | (a) <i>Cohort study</i> —Give the eligibility criteria, and the sources and methods of selection of participants. Describe methods of follow-up<br><i>Case-control study</i> —Give the eligibility criteria, and the sources and methods of case ascertainment and control selection. Give the rationale for the choice of cases and controls<br><i>Cross-sectional study</i> —Give the eligibility criteria, and the sources and methods of selection of participants | ✓(7)                                                                                   |
|                           |                                                                                                                                                                                                                                                                                                           | (b) <i>Cohort study</i> —For matched studies, give matching criteria and number of exposed and unexposed<br><i>Case-control study</i> —For matched studies, give matching criteria and the number of controls per case                                                                                                                                                                                                                                                 | N/A descriptive baseline results of an RCT                                             |
| Variables                 | 7                                                                                                                                                                                                                                                                                                         | Clearly define all outcomes, exposures, predictors, potential confounders, and effect modifiers. Give diagnostic criteria, if applicable                                                                                                                                                                                                                                                                                                                               | ✓(7-11)                                                                                |
| Data sources/measurement  | 8*                                                                                                                                                                                                                                                                                                        | For each variable of interest, give sources of data and details of methods of assessment (measurement). Describe comparability of assessment methods if there is more than one group                                                                                                                                                                                                                                                                                   | ✓(7-10)                                                                                |
| Bias                      | 9                                                                                                                                                                                                                                                                                                         | Describe any efforts to address potential sources of bias                                                                                                                                                                                                                                                                                                                                                                                                              | ✓(10-11)                                                                               |
| Study size                | 10                                                                                                                                                                                                                                                                                                        | Explain how the study size was arrived at                                                                                                                                                                                                                                                                                                                                                                                                                              | Information provided in the published protocol (Anderson et al. BMC Obesity 2015;2:41) |
| Quantitative variables    | 11                                                                                                                                                                                                                                                                                                        | Explain how quantitative variables were handled in the analyses. If applicable, describe which groupings were chosen and why                                                                                                                                                                                                                                                                                                                                           | ✓(10-11)                                                                               |
| Statistical methods       | 12                                                                                                                                                                                                                                                                                                        | (a) Describe all statistical methods, including those used to control for confounding                                                                                                                                                                                                                                                                                                                                                                                  | ✓(10-11)                                                                               |
|                           |                                                                                                                                                                                                                                                                                                           | (b) Describe any methods used to examine subgroups and interactions                                                                                                                                                                                                                                                                                                                                                                                                    | ✓(10-11)                                                                               |
|                           | (c) Explain how missing data were addressed                                                                                                                                                                                                                                                               | N/A                                                                                                                                                                                                                                                                                                                                                                                                                                                                    |                                                                                        |
|                           | (d) <i>Cohort study</i> —If applicable, explain how loss to follow-up was addressed<br><i>Case-control study</i> —If applicable, explain how matching of cases and controls was addressed<br><i>Cross-sectional study</i> —If applicable, describe analytical methods taking account of sampling strategy | N/A descriptive baseline results of an RCT                                                                                                                                                                                                                                                                                                                                                                                                                             |                                                                                        |
|                           | (e) Describe any sensitivity analyses                                                                                                                                                                                                                                                                     | N/A                                                                                                                                                                                                                                                                                                                                                                                                                                                                    |                                                                                        |

| <b>Results</b>           |     |                                                                                                                                                                                                              |           |
|--------------------------|-----|--------------------------------------------------------------------------------------------------------------------------------------------------------------------------------------------------------------|-----------|
| Participants             | 13* | (a) Report numbers of individuals at each stage of study—eg numbers potentially eligible, examined for eligibility, confirmed eligible, included in the study, completing follow-up, and analysed            | ✓ (12)    |
|                          |     | (b) Give reasons for non-participation at each stage                                                                                                                                                         | N/A       |
|                          |     | (c) Consider use of a flow diagram                                                                                                                                                                           | N/A       |
| Descriptive data         | 14* | (a) Give characteristics of study participants (eg demographic, clinical, social) and information on exposures and potential confounders                                                                     | ✓ (12)    |
|                          |     | (b) Indicate number of participants with missing data for each variable of interest                                                                                                                          | ✓ (15)    |
|                          |     | (c) <i>Cohort study</i> —Summarise follow-up time (eg, average and total amount)                                                                                                                             | N/A       |
| Outcome data             | 15* | <i>Cohort study</i> —Report numbers of outcome events or summary measures over time                                                                                                                          | N/A       |
|                          |     | <i>Case-control study</i> —Report numbers in each exposure category, or summary measures of exposure                                                                                                         | N/A       |
|                          |     | <i>Cross-sectional study</i> —Report numbers of outcome events or summary measures                                                                                                                           | N/A       |
| Main results             | 16  | (a) Give unadjusted estimates and, if applicable, confounder-adjusted estimates and their precision (eg, 95% confidence interval). Make clear which confounders were adjusted for and why they were included | ✓ (12–16) |
|                          |     | (b) Report category boundaries when continuous variables were categorized                                                                                                                                    | ✓ (12–16) |
|                          |     | (c) If relevant, consider translating estimates of relative risk into absolute risk for a meaningful time period                                                                                             | N/A       |
| Other analyses           | 17  | Report other analyses done—eg analyses of subgroups and interactions, and sensitivity analyses                                                                                                               | ✓ (12–16) |
| <b>Discussion</b>        |     |                                                                                                                                                                                                              |           |
| Key results              | 18  | Summarise key results with reference to study objectives                                                                                                                                                     | ✓ (17–18) |
| Limitations              | 19  | Discuss limitations of the study, taking into account sources of potential bias or imprecision. Discuss both direction and magnitude of any potential bias                                                   | ✓ (20–21) |
| Interpretation           | 20  | Give a cautious overall interpretation of results considering objectives, limitations, multiplicity of analyses, results from similar studies, and other relevant evidence                                   | ✓ (21)    |
| Generalisability         | 21  | Discuss the generalisability (external validity) of the study results                                                                                                                                        | ✓ (21)    |
| <b>Other information</b> |     |                                                                                                                                                                                                              |           |
| Funding                  | 22  | Give the source of funding and the role of the funders for the present study and, if applicable, for the original study on which the present article is based                                                | ✓ (22)    |

\*Give information separately for cases and controls in case-control studies and, if applicable, for exposed and unexposed groups in cohort and cross-sectional studies.

**Note:** An Explanation and Elaboration article discusses each checklist item and gives methodological background and published examples of transparent reporting. The STROBE checklist is best used in conjunction with this article (freely available on the Web sites of PLoS Medicine at <http://www.plosmedicine.org/>, Annals of Internal Medicine at <http://www.annals.org/>, and Epidemiology at <http://www.epidem.com/>). Information on the STROBE Initiative is available at [www.strobe-statement.org](http://www.strobe-statement.org).
